# Supplementary material for: From encounter to memory: molecular dynamics of heterospecifc recognition in cleaner wrasse
Source: Research Square preprint supplement (doi:10.21203/rs.3.rs-8312257/v1), 2026-01-09
Supplement: Supplementary file 1 [file 04e83ecbf384ea6c9051a9a1.docx]

**From Encounters to Memory: Molecular Mechanisms of Interspecific Individual Recognition in *L. dimidiatus***

Daniele Romeo1; Celia Schunter1,2

*1Swire Institute of Marine Science, School of Biological Sciences, The University of Hong Kong, Pokfulam Rd, Hong Kong SAR*

*2State Key Laboratory of Marine Pollution, City University of Hong Kong, Hong Kong, Hong Kong SAR, China*

**Supplementary Figures**


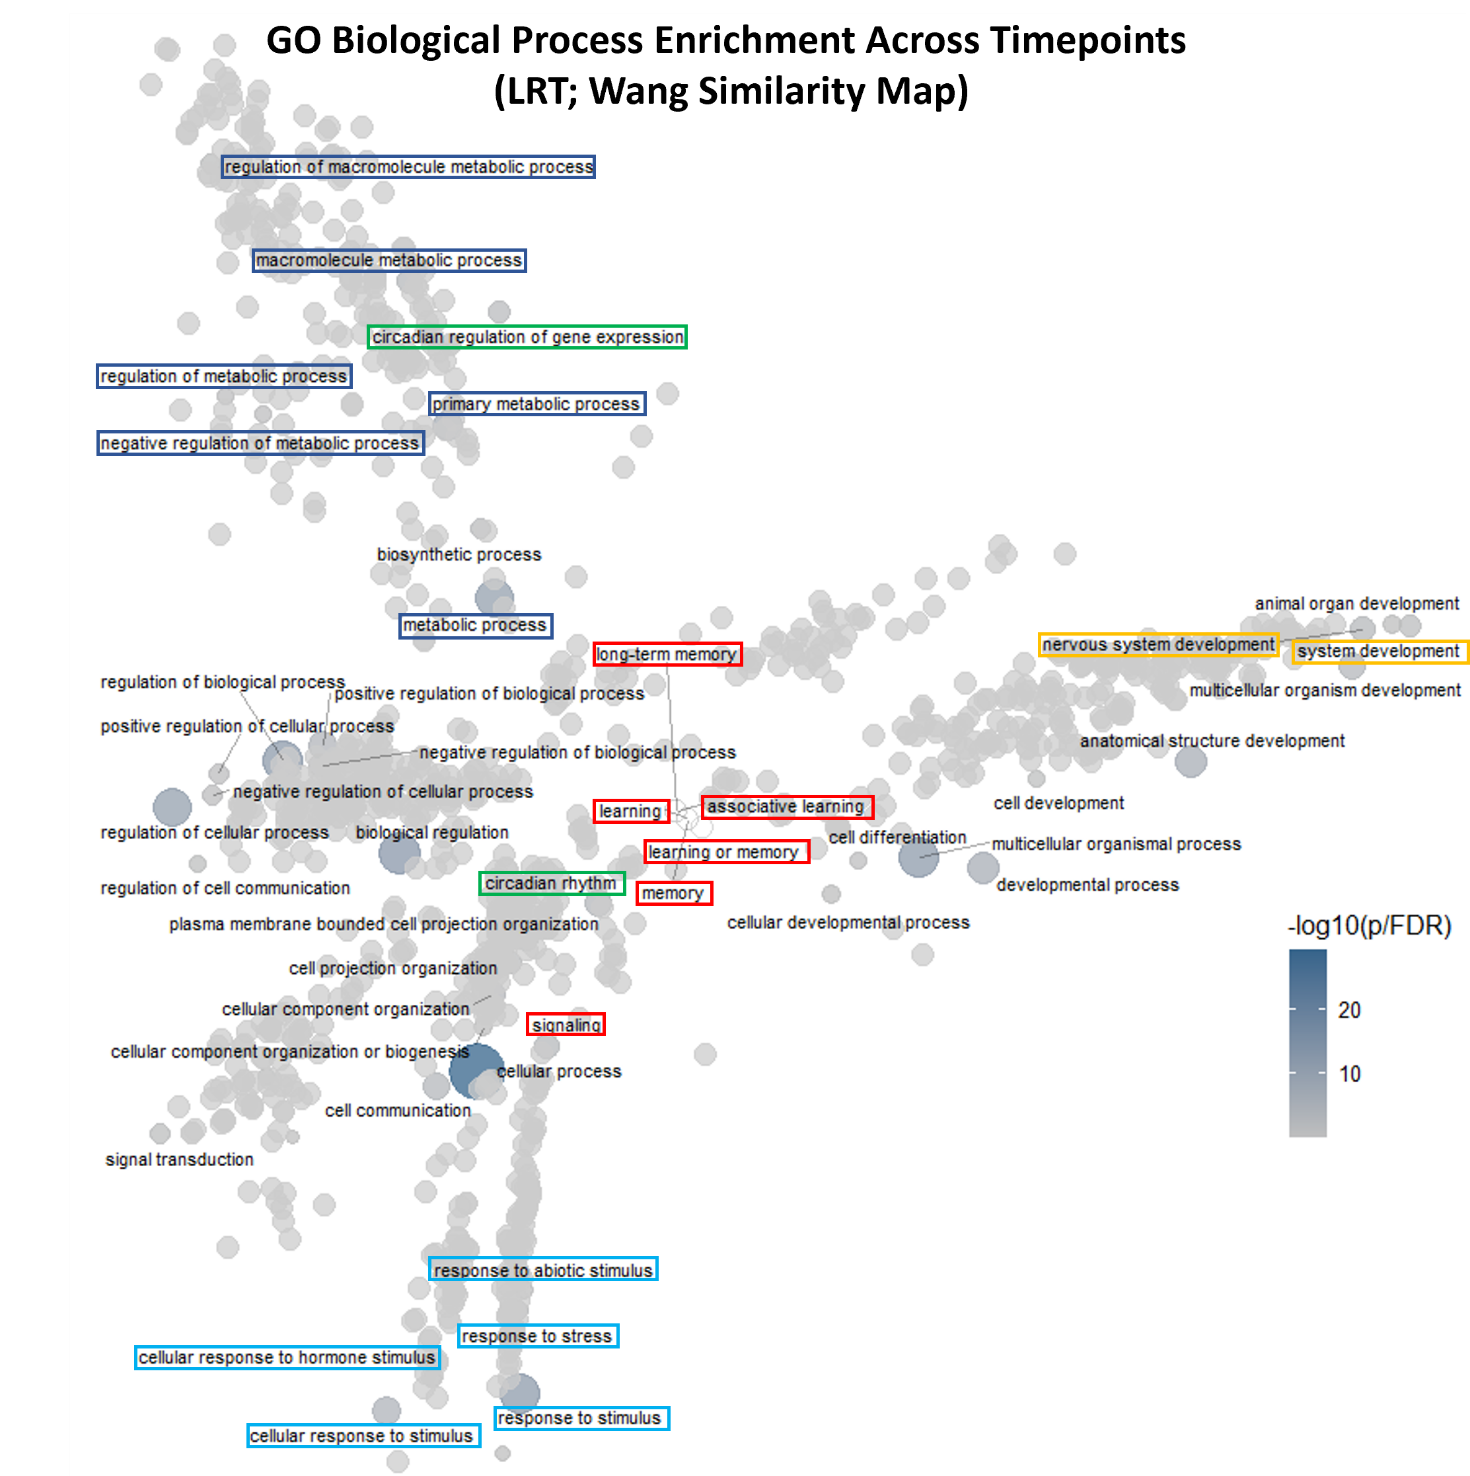


*Supp. figure 1) Semantic map of GO Biological Process enrichment across timepoints (LRT). Pairwise GO term similarity was computed with the Wang measure and embedded in 2D using classical MDS (multidimensional scaling); thus, points that are closer are more semantically similar, while the axes have no inherent meaning (only relative distances matter). Point size reflects term size (Count), color scale shows −log10(p/FDR). Colored label boxes mark thematic groups: red = learning & memory, green = circadian rhythm, dark blue = metabolism, light blue = responses to stimulus/stress, and yellow = nervous system development.*
