# Supplementary material for: From encounter to memory: molecular dynamics of heterospecifc recognition in cleaner wrasse
Source: Research Square preprint supplement (doi:10.21203/rs.3.rs-8312257/v1), 2026-01-09
Supplement: Supplementary file 2 [file 808513a2793dfc1d7e03e45b.xlsx]

## Sheet: Supp. Table 1
Supplementary Table 1. Summary of two-choice behaviour in the social-preference assay. For each condition, paired comparisons report mean ± SD time (s) spent near each client (and, for the “Total Time” rows, the corresponding percentages of total assay time), with two-sided Wilcoxon signed-rank P values. In Familiar trials, cleaners spent less time near the familiar client than the unfamiliar one…
Condition	Metric	Group1	Mean1	SD1	Group2	Mean2	SD2	P_value	Time Test
Familiar	Time (s)	Familiar	82.91	64.66	Unfamiliar	138.22	82.79	0.04	Total Time
Control	Time (s)	Randomized client A	99.78	89.15	Randomized client B	122.2	82.07	0.4	Total Time
Familiar	Percentage	Familiar	26.27	21.04	Unfamiliar	41.98	23.66	0.05	Total Time
Control	Percentage	Randomized client A	30.13	25.73	Randomized client B	38.5	25.01	0.34	Total Time
Control	Time (s)	Right	99.7	81.03	Left	122.28	90.07	0.49	Total Time
Familiar	Time (s)	Right	109.07	67.24	Left	112.05	89.94	0.9	Total Time
Familiar	Time (s)	Familiar	23.99	33.23	Unfamiliar	46.06	39.99	0.036	First Time Bin
Control	Time (s)	Randomized client A	34.3	36.4	Randomized client B	50.58	75.74	0.707	First Time Bin
Familiar	Time (s)	Familiar	29.6	30.37	Unfamiliar	62.24	36.33	0.007	Second Time Bin
Control	Time (s)	Randomized client A	49.19	37.36	Randomized client B	36.84	32.23	0.289	Second Time Bin

## Sheet: Supp. Table 2
Supplementary Table 2. Differential gene expression immediately after the assay (TP0). Each row is a gene. baseMean is the average normalized expression across samples in this comparison. log2FoldChange is the estimated effect size (Familiar − Control, log₂ units; positive = higher in Familiar; negative = higher in Control) and lfcSE is its standard error. log2FC_shr and lfcSE_shr are shrinkage-a…
GeneID	baseMean	log2FoldChange	lfcSE	log2FC_shr	lfcSE_shr	stat	pvalue	padj	Symbol
Ldim_g10729	2.04198	15.869	3.13672	3.77556e-07	0.00144269	5.05912	4.21205e-07	0.000365509	LOC121649117
Ldim_g11448	5.6596	19.7006	4.38618	1.20361e-07	0.0014427	4.49153	7.07134e-06	0.00431199	SUSD5
Ldim_g11979	1.74123	16.4557	2.99299	5.75315e-07	0.0014427	5.49807	3.83969e-08	5.77541e-05	HAO1
Ldim_g1202	4.26399	-24.9353	5.52408	-2.16452e-09	0.0014427	-4.51392	6.36388e-06	0.004223	-
Ldim_g12388	374.063	-29.8451	5.02797	-2.47293e-07	0.0014427	-5.93582	2.92382e-09	4.71195e-06	Lire1
Ldim_g12418	1.31354	-29.9847	2.99615	-3.36389e-07	0.0014427	-10.0077	1.40942e-23	1.58996e-19	ICAM1
Ldim_g1254	8.99515	-28.1654	4.54371	-1.22351e-07	0.0014427	-6.19877	5.69047e-10	1.0699e-06	col21a1
Ldim_g1278	115.018	0.765328	0.144327	0.704197	0.150872	5.30275	1.14071e-07	0.000107372	HIPK2
Ldim_g13169	2259.61	-30	5.50082	-8.75417e-08	0.0014427	-5.45374	4.93221e-08	6.76431e-05	glis2
Ldim_g13199	40.6062	-29.9861	2.89826	-3.59935e-07	0.0014427	-10.3463	4.35194e-25	9.81885e-21	gsg1l
Ldim_g13436	5.23048	-29.9117	5.57621	-4.67419e-08	0.0014427	-5.36416	8.13273e-08	8.34049e-05	LOC110016737
Ldim_g14039	1217.29	0.424983	0.097837	0.371352	0.105512	4.34379	1.40047e-05	0.0081019	NHLRC1
Ldim_g14381	0.962774	-29.9069	5.53118	-8.8282e-08	0.0014427	-5.40697	6.40992e-08	6.8867e-05	GRINA
Ldim_g15033	1.471	-23.0668	5.53708	-2.28747e-07	0.0014427	-4.16588	3.1016e-05	0.0155507	LSM14B
Ldim_g15686	3.84544	-25.803	2.59906	-4.50337e-07	0.0014427	-9.92783	3.15046e-23	2.36936e-19	rpl10
Ldim_g15984	3.6158	-29.9896	5.51708	-1.83672e-07	0.0014427	-5.43577	5.45607e-08	6.76431e-05	Tbc1d25
Ldim_g17143	3.3011	14.4516	3.00614	3.63742e-07	0.00144269	4.80738	1.52924e-06	0.00115009	-
Ldim_g17192	6674.23	0.293858	0.0706517	0.254646	0.0766904	4.15925	3.19295e-05	0.0156336	Pim2
Ldim_g1844	8.50536	-29.9607	4.1152	-1.6406e-07	0.0014427	-7.28048	3.32624e-13	1.07209e-09	LOC120547632
Ldim_g18833	0.488883	-22.549	5.57648	-1.04906e-07	0.0014427	-4.04359	5.26399e-05	0.0228396	-
Ldim_g20807	33.1413	-29.7909	5.50124	-9.71362e-08	0.0014427	-5.4153	6.11874e-08	6.8867e-05	DNASE2B
Ldim_g21347	0.585551	-26.6052	3.29577	-2.41818e-07	0.0014427	-8.07251	6.88682e-16	3.88451e-12	RABGAP1
Ldim_g22259	9.7971	-29.9965	5.50715	-5.30583e-08	0.0014427	-5.44683	5.12764e-08	6.76431e-05	-
Ldim_g22578	3.44959	23.6496	5.57221	9.47379e-08	0.0014427	4.2442	2.19375e-05	0.012072	LOC117552018
Ldim_g22806	28.7634	-3.24514	0.828157	-3.16217e-06	0.0014427	-3.91851	8.9098e-05	0.0372265	phka2
Ldim_g243	2.59569	-25.3223	3.24323	-2.09075e-07	0.00144269	-7.80775	5.82174e-15	2.627e-11	wscd1
Ldim_g3089	229.914	0.979156	0.229891	0.857668	0.247091	4.25922	2.0514e-05	0.0115709	EDNRB
Ldim_g3530	131.482	6.22701	1.52034	5.18443	1.85035	4.09581	4.20696e-05	0.0192653	Homez
Ldim_g3603	0.309433	21.1937	4.7185	1.24228e-07	0.0014427	4.49163	7.06813e-06	0.00431199	Fabp6
Ldim_g4554	2.25022	-29.9201	5.51209	-9.19203e-08	0.0014427	-5.42808	5.69639e-08	6.76431e-05	-
Ldim_g4681	8.19136	29.082	5.49772	1.6151e-07	0.0014427	5.28983	1.22433e-07	0.000110493	Mfn1
Ldim_g470	3.20771	-23.0744	5.51904	-9.22835e-08	0.0014427	-4.18087	2.90398e-05	0.0148908	UBASH3B
Ldim_g471	18.3883	-4.06513	1.01023	-2.65479e-06	0.0014427	-4.02398	5.72217e-05	0.0243592	BCO2
Ldim_g4759	4.16956	16.1107	3.37749	3.29833e-07	0.0014427	4.77003	1.84202e-06	0.00134063	LIPT1
Ldim_g4903	3.26605	23.0638	5.55766	7.44897e-08	0.0014427	4.14991	3.32601e-05	0.0156336	MPP4
Ldim_g4946	2.30776	-27.5646	5.53233	-9.35826e-08	0.0014427	-4.98245	6.2785e-07	0.000505912	-
Ldim_g504	4.96183	-26.0213	5.50234	-9.83882e-08	0.0014427	-4.72913	2.25481e-06	0.00154161	NEU3
Ldim_g5265	10.3179	-22.5748	5.39615	-9.53107e-08	0.0014427	-4.1835	2.87056e-05	0.0148908	ABCC4
Ldim_g5849	0.777842	17.7884	2.54104	5.3906e-07	0.0014427	7.00047	2.55113e-12	6.39541e-09	rnf169
Ldim_g5908	85.9821	-29.9254	4.10528	-1.70213e-07	0.0014427	-7.28948	3.11157e-13	1.07209e-09	snap25
Ldim_g6333	0.73012	-29.958	4.80345	-7.91428e-08	0.0014427	-6.23676	4.46722e-10	9.16267e-07	PRSS16
Ldim_g6378	1.42367	21.2066	4.48321	-7.20511e-07	0.0014427	4.73022	2.24275e-06	0.00154161	FBXO46
Ldim_g6485	2.58357	-22.6129	5.52801	-9.14589e-08	0.0014427	-4.0906	4.30251e-05	0.0192653	CCNB2
Ldim_g6620	38.9604	-1.10251	0.261654	-1.68111e-05	0.00144272	-4.21362	2.51313e-05	0.0135003	-
Ldim_g7287	1.75289	-24.6349	5.5249	-9.17834e-08	0.0014427	-4.45889	8.2384e-06	0.00489144	bmp2
Ldim_g7551	0.43348	-17.325	3.85306	-1.76501e-07	0.0014427	-4.49641	6.91104e-06	0.00431199	RAD51AP2
Ldim_g8110	1.65741	-29.3397	5.53317	-9.05739e-08	0.0014427	-5.30252	1.14215e-07	0.000107372	TAAR1
Ldim_g8201	14.4066	-27.9736	4.60303	-3.47648e-07	0.0014427	-6.07721	1.22293e-09	2.12245e-06	Taar7f
Ldim_g834	0.766919	22.1777	3.20048	2.01959e-07	0.00144269	6.9295	4.22327e-12	9.52853e-09	KCNJ6
Ldim_g8371	0.940132	19.0149	4.57742	9.72671e-08	0.0014427	4.15406	3.26624e-05	0.0156336	lrrc3
Ldim_g902	2.82428	-27.8591	5.53046	-9.26791e-08	0.0014427	-5.03739	4.71921e-07	0.000394351	-
Ldim_g9075	20.4602	2.07758	0.508239	1.81944	0.570258	4.0878	4.35481e-05	0.0192653	B3gnt6
Ldim_g9079	0.393503	-27.1808	5.5274	-8.63443e-08	0.0014427	-4.91747	8.76711e-07	0.000682081	-
Ldim_g9221	3.93556	-29.9385	4.19195	6.62125e-08	0.0014427	-7.14189	9.2053e-13	2.59612e-09	Tmprss9

## Sheet: Supp. Table 3
Supplementary Table 3. Differential gene expression 30 minutes after the assay. Columns are as above (baseMean, raw and shrinkage-adjusted log₂ fold changes with SEs, stat, pvalue, padj, Symbol; positive log2FC = higher in Familiar). TP30 emphasizes stronger GABA braking in forebrain neurons (slc12a5), synaptic/plasticity processes including AMPAR trafficking and activity-dependent tuning (agap3,…
GeneID	baseMean	log2FoldChange	lfcSE	log2FC_shr	lfcSE_shr	stat	pvalue	padj	Symbol
Ldim_g10075	160.236	-0.592515	0.125113	-0.531203	0.133058	-4.73583	2.18157e-06	0.00164069	CDH7
Ldim_g10670	3.29017	17.5829	1.96897	0.000446758	0.0226235	8.93	4.26027e-19	1.9224e-15	SLC12A5
Ldim_g10729	2.04198	16.6109	2.69797	0.000257835	0.0226191	6.15682	7.42199e-10	8.81342e-07	LOC121649117
Ldim_g1204	7.31049	-29.9572	4.4987	-7.28193e-05	0.0226174	-6.65909	2.75528e-11	4.78189e-08	-
Ldim_g12053	29.7655	1.98642	0.509803	1.6845	0.567621	3.89644	9.76165e-05	0.0431848	-
Ldim_g12171	13.4666	-10.8412	2.75126	-0.000211318	0.0226186	-3.94044	8.1333e-05	0.0367007	Rbbp6
Ldim_g1253	2.95043	-21.5459	4.71915	-6.80026e-05	0.0226173	-4.56563	4.97986e-06	0.00362438	-
Ldim_g1254	8.99515	-29.143	3.86405	-0.000103773	0.0226175	-7.54207	4.62559e-14	1.30453e-10	col21a1
Ldim_g13196	39.2318	-2.92852	0.687216	-0.00244851	0.0228103	-4.26143	2.03127e-05	0.0111779	U2AF2
Ldim_g13377	37.86	-4.8733	1.08343	-0.00120738	0.0226645	-4.49804	6.85834e-06	0.00458593	-
Ldim_g14062	7.01731	24.2061	4.76852	3.62191e-05	0.0226171	5.07624	3.84976e-07	0.000310208	Atxn1
Ldim_g14939	0.346188	20.3289	4.78509	4.8834e-05	0.0226171	4.24838	2.15324e-05	0.0114441	sdf4
Ldim_g15504	964.531	0.37277	0.0917662	0.319352	0.100243	4.06217	4.86185e-05	0.0238463	LARP4
Ldim_g15508	0.26641	17.7702	4.18567	5.56193e-05	0.0226172	4.2455	2.18108e-05	0.0114441	PPARD
Ldim_g15611	5.93743	25.1232	2.80158	0.000204007	0.0226184	8.9675	3.03322e-19	1.71089e-15	TNFRSF1A
Ldim_g15984	3.6158	-29.9267	4.78017	-5.71801e-05	0.0226172	-6.26058	3.83539e-10	5.09024e-07	Tbc1d25
Ldim_g16227	691.511	-0.324524	0.0838854	-0.274494	0.0925806	-3.86866	0.000109437	0.0474831	-
Ldim_g16488	13.6547	-21.2091	4.78496	-5.8079e-05	0.0226172	-4.43244	9.31724e-06	0.00583932	MIPOL1
Ldim_g18250	49.2493	-2.90411	0.645871	-0.00281065	0.022873	-4.49642	6.9108e-06	0.00458593	AGAP2
Ldim_g1877	1.1161	-26.4817	4.76228	-6.40649e-05	0.0226173	-5.56072	2.6867e-08	2.52572e-05	Lrrc27
Ldim_g18833	0.488883	24.3879	4.78509	5.84327e-05	0.0226172	5.09664	3.45735e-07	0.000288906	-
Ldim_g20276	6.60378	26.8212	3.62212	0.000118816	0.0226176	7.40483	1.31316e-13	3.29196e-10	LOC118326973
Ldim_g20504	3.34394	-29.979	4.28727	-8.25186e-05	0.0226174	-6.99256	2.69924e-12	5.07503e-09	NR5A2
Ldim_g20761	0.366319	19.2194	3.967	7.35754e-05	0.0226172	4.84482	1.26724e-06	0.000985915	ZCCHC9
Ldim_g20807	33.1413	20.5513	4.71254	9.1725e-05	0.0226174	4.36098	1.2948e-05	0.00730329	DNASE2B
Ldim_g21295	22.4875	-1.66193	0.376765	-0.00598053	0.0237822	-4.41104	1.02877e-05	0.00610819	CKMT2
Ldim_g21347	0.585551	14.8941	2.86111	0.000148643	0.0226176	5.20572	1.93246e-07	0.000167693	RABGAP1
Ldim_g21616	0.437813	-29.9785	3.86536	-8.37115e-05	0.0226173	-7.75566	8.78842e-15	2.83263e-11	atad1b
Ldim_g22761	7.7844	-29.9887	4.71262	-6.85626e-05	0.0226173	-6.36348	1.97235e-10	3.17858e-07	Dtwd1
Ldim_g22983	1.59272	18.7309	4.74678	0.000113948	0.0226176	3.94602	7.94605e-05	0.0365875	sbf2
Ldim_g3518	1377.18	0.234422	0.0559625	0.204708	0.0604162	4.18891	2.80294e-05	0.0140533	ZNF658
Ldim_g361	6.75634	-29.4546	1.97237	-0.00044285	0.0226235	-14.9336	1.99232e-50	4.49507e-46	B3GNT3
Ldim_g3860	14.1636	20.3382	4.5098	7.42234e-05	0.0226173	4.50978	6.48958e-06	0.00457556	rps15
Ldim_g4172	14.9461	18.234	2.57807	0.000233761	0.0226189	7.07275	1.51898e-12	3.11557e-09	AGAP3
Ldim_g436	2.9288	-28.6434	2.41751	-0.000246835	0.0226189	-11.8483	2.19556e-32	2.47681e-28	Trpc2
Ldim_g4681	8.19136	29.5128	4.72648	0.000106559	0.0226175	6.24415	4.26104e-10	5.34098e-07	Mfn1
Ldim_g4869	2.30798	14.2654	2.47496	0.000156705	0.0226175	5.76389	8.21961e-09	8.42958e-06	-
Ldim_g4946	2.30776	-29.9856	4.73447	-6.03212e-05	0.0226173	-6.33347	2.39709e-10	3.60554e-07	-
Ldim_g5455	107.315	0.871788	0.199282	0.764745	0.215251	4.37464	1.21635e-05	0.00703672	-
Ldim_g5606	1977.27	0.269126	0.0672321	0.230632	0.0734824	4.00294	6.25595e-05	0.0294056	-
Ldim_g6197	0.326925	-29.9357	4.09559	-5.65932e-05	0.0226172	-7.30926	2.68618e-13	6.06055e-10	Dhrs13
Ldim_g6422	288.315	0.452613	0.102496	0.400383	0.109584	4.4159	1.00592e-05	0.00610819	-
Ldim_g6485	2.58357	28.8081	4.73096	9.01932e-05	0.0226174	6.08926	1.13434e-09	1.27965e-06	CCNB2
Ldim_g6690	0.617108	-29.9855	4.78028	-6.20884e-05	0.0226173	-6.27275	3.54724e-10	5.00205e-07	si:dkey-1h6.8
Ldim_g7287	1.75289	26.8459	4.74979	6.93078e-05	0.0226173	5.65202	1.58575e-08	1.55555e-05	bmp2
Ldim_g8018	1.25443	16.3135	1.65411	0.000549637	0.0226261	9.86241	6.05758e-23	4.5557e-19	LOC117819828
Ldim_g8110	1.65741	27.9498	4.75001	6.42525e-05	0.0226172	5.88415	4.00102e-09	4.29862e-06	TAAR1
Ldim_g8201	14.4066	-16.9115	4.01487	-8.56865e-05	0.0226173	-4.21222	2.52868e-05	0.0129664	Taar7f
Ldim_g8324	453.705	0.60137	0.134011	0.532211	0.143478	4.48746	7.20761e-06	0.00464623	LATS2
Ldim_g8371	0.940132	-29.9835	3.86328	-0.000100666	0.0226175	-7.76115	8.416e-15	2.83263e-11	lrrc3
Ldim_g9221	3.93556	19.471	3.59349	0.00013806	0.0226178	5.4184	6.01357e-08	5.42712e-05	Tmprss9
Ldim_g988	106.86	0.555689	0.138441	0.476869	0.152125	4.01389	5.9726e-05	0.028671	Rbmx2

## Sheet: Supp. Table 4
Supplementary Table 4. Differential gene expression two hours after the assay (TP120). Columns are as in TP0/TP30 (mean expression; raw and shrinkage-adjusted effects with SEs; Wald statistic; nominal and FDR-adjusted P; gene symbol; positive log2FC = higher in Familiar). TP120 is consistent with consolidation: adhesion/synapse stabilization (adgrl1), spine reorganization (cdc42ep1), initiation o…
GeneID	baseMean	log2FoldChange	lfcSE	log2FC_shr	lfcSE_shr	stat	pvalue	padj	Symbol
Ldim_g10477	633.056	-0.409115	0.103209	-0.347756	0.113945	-3.96396	7.37163e-05	0.0386788	Bmp7
Ldim_g10574	1.45766	-17.6566	3.07963	-9.00423e-05	0.0285947	-5.73336	9.84601e-09	1.70881e-05	GJD4
Ldim_g1077	5.75377	-29.9294	4.547	-9.83574e-05	0.0285952	-6.58223	4.6343e-11	1.04559e-07	-
Ldim_g11432	1635.94	0.416893	0.10739	0.352916	0.117919	3.88206	0.000103576	0.0486851	Nobox
Ldim_g11979	1.74123	16.0412	2.85159	0.000349726	0.0285976	5.62537	1.85113e-08	2.98322e-05	HAO1
Ldim_g1201	0.700305	18.4693	2.89551	0.000302744	0.0285967	6.37862	1.78688e-10	3.35964e-07	-
Ldim_g12463	148.128	4.30042	0.823805	3.97497	0.84009	5.22019	1.78739e-07	0.000201635	Adgrl1
Ldim_g1254	2.95043	28.4518	5.30935	9.3463e-05	0.0285947	5.35882	8.37689e-08	9.94733e-05	col21a1
Ldim_g13360	0.891315	-29.8444	4.63595	-9.84668e-05	0.0285951	-6.43761	1.21366e-10	2.48933e-07	Tmod4
Ldim_g13436	5.23048	-29.6153	5.34916	-6.39618e-05	0.028595	-5.53645	3.08671e-08	4.35264e-05	LOC110016737
Ldim_g1500	972.827	0.533156	0.134848	0.454665	0.147532	3.95375	7.69359e-05	0.039037	-
Ldim_g15508	0.26641	-22.0551	4.70077	-7.16582e-05	0.0285949	-4.69181	2.70804e-06	0.00210686	PPARD
Ldim_g15984	3.6158	25.0341	5.35522	0.000110282	0.028595	4.67471	2.94373e-06	0.00221388	Tbc1d25
Ldim_g16207	3061.44	0.2521	0.0644653	0.215117	0.070225	3.91063	9.20545e-05	0.0451507	-
Ldim_g16488	13.6547	-22.2041	5.37179	-6.73952e-05	0.028595	-4.13347	3.57325e-05	0.0212157	MIPOL1
Ldim_g17143	3.3011	-28.2743	2.82335	-0.00028294	0.028597	-10.0144	1.31699e-23	9.90467e-20	-
Ldim_g18368	19.7789	-2.15741	0.554069	-0.00509103	0.0292509	-3.89377	9.86997e-05	0.0473801	Slc6a17
Ldim_g1877	1.1161	-25.4325	5.36154	-6.42733e-05	0.028595	-4.7435	2.10057e-06	0.00174764	Lrrc27
Ldim_g12873	0.488883	-26.8525	5.32136	0.00133633	0.0284682	-5.04616	4.50775e-07	0.00046229	-
Ldim_g19133	66.3523	-0.934127	0.214901	-0.820708	0.230163	-4.34678	1.3815e-05	0.00890552	-
Ldim_g19369	0.252813	-26.3437	5.36816	-5.59221e-05	0.0285949	-4.90741	9.22877e-07	0.000867581	Atad5
Ldim_g19657	0.577961	-17.8319	2.56533	-0.000272124	0.0285962	-6.95112	3.62399e-12	1.02205e-08	G3BP2
Ldim_g20063	9.68267	-7.13114	1.74389	-0.000970752	0.0286193	-4.08921	4.32838e-05	0.0244142	-
Ldim_g20276	6.60378	-29.3784	4.09788	-0.000117643	0.0285952	-7.16916	7.54581e-13	2.43212e-09	LOC118326973
Ldim_g21858	0.859787	15.6844	2.16551	0.000466672	0.028599	7.24284	4.39397e-13	1.65228e-09	UNK
Ldim_g22152	593.39	0.310623	0.076932	0.266739	0.0836332	4.03763	5.39941e-05	0.0297126	Cdc42ep1
Ldim_g22259	9.7971	-25.4638	5.3755	-5.71778e-06	0.0285948	-4.73702	2.16887e-06	0.00174764	-
Ldim_g22737	2265.13	0.410927	0.0909495	0.366943	0.0963477	4.51819	6.23708e-06	0.00439753	tle3b
Ldim_g2550	7244.74	0.430637	0.103176	0.375221	0.110748	4.17381	2.99553e-05	0.0182662	eif4e1a
Ldim_g3324	3.18097	-18.6575	1.76437	-0.000806101	0.0286103	-10.5746	3.90931e-26	4.41009e-22	spdl1
Ldim_g4304	0.419528	-27.2336	5.05377	-7.04663e-05	0.028595	-5.38877	7.0943e-08	8.89231e-05	BEST4
Ldim_g4645	3.10988	-24.5858	5.36584	-6.52154e-05	0.028595	-4.58191	4.60754e-06	0.0033534	-
Ldim_g4649	5.7771	7.26761	1.76883	6.71724	2.11144	4.1087	3.97886e-05	0.0230182	-
Ldim_g4903	3.26605	-29.9445	5.36931	-6.18082e-05	0.0285949	-5.57697	2.44739e-08	3.6812e-05	MPP4
Ldim_g4946	2.30776	-29.2286	5.36103	-7.05041e-05	0.028595	-5.45204	4.97959e-08	6.60879e-05	-
Ldim_g5215	104.832	1.5694	0.359196	1.38527	0.385738	4.3692	1.247e-05	0.00827495	AAMP
Ldim_g5293	5.91481	-22.5516	5.31625	-7.34075e-05	0.0285951	-4.24202	2.21519e-05	0.0138831	-
Ldim_g6378	1.42367	-19.2887	4.33961	-0.000110167	0.0285952	-4.44479	8.79791e-06	0.0060151	FBXO46
Ldim_g7128	3.71208	-29.9585	3.90942	-0.00013056	0.0285953	-7.66316	1.81416e-14	8.18622e-11	EVA1C
Ldim_g7130	4242.45	0.359775	0.0903745	0.307936	0.0984945	3.98094	6.86436e-05	0.0368747	Mycn
Ldim_g7287	1.75289	-25.6941	5.36476	-6.80552e-05	0.028595	-4.78942	1.67263e-06	0.00145146	bmp2
Ldim_g7551	0.43348	-29.6898	3.74188	-0.000118415	0.028595	-7.93445	2.11438e-15	1.19261e-11	RAD51AP2
Ldim_g8201	14.4066	29.988	4.39669	0.000210038	0.028596	6.82059	9.06657e-12	2.27289e-08	Taar7f
Ldim_g8308	0.333919	-27.8322	5.35675	-6.7751e-05	0.028595	-5.19572	2.03926e-07	0.000219094	MAN1A2
Ldim_g8371	0.940132	-22.1381	4.40661	-8.52357e-05	0.028595	-5.02383	5.0651e-07	0.000496864	lrrc3
Ldim_g8486	4.45522	-19.4406	1.80648	-0.00064972	0.0286041	-10.7616	5.22639e-27	1.17918e-22	GPR183
Ldim_g8757	4.75128	-26.1635	5.35503	-6.95557e-05	0.028595	-4.88577	1.03024e-06	0.000929768	foxc1a
Ldim_g9649	2851.83	0.441052	0.111634	0.376194	0.121857	3.95089	7.78595e-05	0.039037	LPP

## Sheet: Supp. Table 5
Supplementary Table 5. DEGs from timepoint LRT showing across-time dynamics in the Familiar treatment. baseMean summarizes normalized expression. log2FoldChange (with lfcSE) reports the direction and magnitude for the relevant comparison shown in Fig. 3C; where shrinkage was applied, log2FC_shr/lfcSE_shr are provided. stat is the model test statistic (Wald or LRT, as applicable), with pvalue and …
GeneID	baseMean	log2FoldChange	lfcSE	stat	pvalue	padj	Symbol
Ldim_g10075	160.236	-0.358061	0.204165	30.9701	3.10472e-06	0.000444002	CDH7
Ldim_g10134	2089.39	0.118379	0.0897712	19.1004	0.000751045	0.0238911	si:ch211-37e10.2
Ldim_g10141	4168.82	0.298043	0.162275	23.3182	0.000109374	0.00642414	mastl
Ldim_g10179	938.247	-0.0835069	0.203943	38.4841	8.90308e-08	2.4817e-05	sox17a
Ldim_g10284	400.297	-0.172031	0.911334	17.5922	0.00148238	0.0370217	Gars1
Ldim_g10295	332	-0.21291	0.363282	36.1781	2.65952e-07	6.16036e-05	LOC117829331
Ldim_g10315	721.06	0.0295261	0.129307	30.8968	3.21336e-06	0.000455577	-
Ldim_g10424	528.872	0.146388	0.237776	21.9806	0.000202206	0.0102953	C1QL2
Ldim_g10435	1369.65	-0.880268	0.591742	36.8538	1.93065e-07	4.66933e-05	CNTNAP2
Ldim_g10477	633.056	-0.490296	0.148075	28.7503	8.78541e-06	0.000963232	Bmp7
Ldim_g10489	165.793	0.447088	0.449734	19.3816	0.000661221	0.0222168	LOC110003656
Ldim_g10527	328.028	0.492608	0.16713	19.2794	0.000692555	0.022871	NTNG1
Ldim_g1054	96.2756	1.40814	1.75506	24.0217	7.90805e-05	0.00506053	-
Ldim_g10765	1048.34	0.144774	0.19467	18.8329	0.000847636	0.0258152	Lhx2
Ldim_g10777	1063.26	0.281481	0.16654	30.3191	4.21423e-06	0.000545727	LOC111191400
Ldim_g10798	1241.27	0.424034	0.184883	17.6604	0.00143766	0.0362515	LOC110970170
Ldim_g10803	2987.76	-0.079429	0.139656	20.2621	0.00044328	0.0169523	LOC117814104
Ldim_g10824	10799.1	0.155886	0.164089	16.7462	0.00216519	0.0481198	LOC119907217
Ldim_g10888	3584.83	0.290899	0.198538	18.1228	0.00116774	0.0321687	gag-pol
Ldim_g10892	292.886	0.0299108	0.434742	31.4877	2.43442e-06	0.000363967	chs-1
Ldim_g10904	2017	0.0592427	0.108084	21.2536	0.000282034	0.0125022	G2E3
Ldim_g10935	3862.31	0.652688	0.227832	23.6491	9.39087e-05	0.00576277	-
Ldim_g10942	357.95	0.327521	0.274166	37.7367	1.26982e-07	3.36831e-05	gsg1l
Ldim_g10956	207.327	-0.259781	0.207929	44.6569	4.68566e-09	2.08271e-06	anp32e
Ldim_g11024	3291.26	0.0134076	0.108953	22.7865	0.000139688	0.00776118	med10
Ldim_g11047	4364.2	-0.112099	0.0865111	21.6344	0.000236956	0.0112305	PHF14
Ldim_g11079	817.323	0.238566	0.212889	17.1832	0.00178073	0.0421593	ginm1
Ldim_g11123	2946.51	0.200926	0.116049	18.5674	0.000955612	0.0281145	-
Ldim_g11138	5708.98	0.298936	0.162473	17.2137	0.00175661	0.0419293	-
Ldim_g11167	10873.5	0.0678656	0.0989019	20.697	0.00036361	0.0149444	-
Ldim_g11183	1973.99	-0.0840456	0.146984	20.3349	0.000428832	0.0166334	tbxta
Ldim_g11185	5074.21	-0.0278118	0.142167	21.1739	0.000292492	0.0127506	-
Ldim_g11187	37.9443	-0.207976	0.667171	17.395	0.00161954	0.0392846	Pla2r1
Ldim_g11189	182.103	-1.04112	0.832961	19.9302	0.000515488	0.0187146	LOC117817889
Ldim_g11191	591.861	0.138585	0.106255	16.8126	0.00210192	0.0472757	LOC113746852
Ldim_g11284	2129.62	0.389234	0.175862	27.0327	1.9579e-05	0.00177898	Gjb4
Ldim_g11294	582.796	-0.0324656	0.11608	18.2077	0.00112392	0.0315427	-
Ldim_g1134	1031.01	-0.156785	0.159767	38.2123	1.01304e-07	2.77673e-05	irf2bp2a
Ldim_g11341	666.998	-0.28837	0.153791	18.6218	0.000932455	0.0276309	CCDC126
Ldim_g1135	513.624	0.0316606	0.20159	20.373	0.000421457	0.016386	-
Ldim_g11371	1322.59	0.286563	0.140929	23.7365	9.01997e-05	0.00557678	ANKRD28
Ldim_g1141	67.1513	-0.129421	0.32931	24.0305	7.87565e-05	0.00505949	b3galnt2
Ldim_g11424	2557.15	0.0589854	0.102819	20.242	0.000447362	0.0169523	GPR12
Ldim_g11425	607.371	-0.194978	0.329434	28.0957	1.19279e-05	0.00119613	WASF2
Ldim_g11455	1396.14	-0.220749	0.0961658	17.9018	0.00128984	0.0342141	KCNQ4
Ldim_g11476	874.135	-0.273771	0.16416	19.9132	0.000519493	0.0187771	tshz1
Ldim_g11494	1224	0.129261	0.100253	18.2253	0.00111503	0.0313466	klhl38
Ldim_g11536	398.931	0.0279878	0.360192	84.6125	1.83311e-17	5.02455e-14	HEY1
Ldim_g11550	1263.36	0.349758	0.278746	22.8337	0.000136687	0.00764611	dtnbp1b
Ldim_g1156	884.293	-0.228679	0.253264	22.9607	0.000128937	0.00736282	C1qtnf3
Ldim_g11581	175.882	-0.192777	0.210216	24.1205	7.55519e-05	0.00495031	LINGO1
Ldim_g11588	1362.37	-0.101574	0.165408	19.0628	0.000763937	0.024161	Scrt2
Ldim_g11602	44.6688	1.53981	0.61149	16.7234	0.00218733	0.0483343	-
Ldim_g1164	1020.39	-0.014503	0.121453	17.8393	0.00132663	0.0348704	KLHDC3
Ldim_g1166	1532.07	0.0374697	0.239743	17.6719	0.00143028	0.0361882	mymx
Ldim_g11689	532.005	0.282891	0.269759	21.0635	0.000307624	0.013175	Tmem268
Ldim_g11693	2477.28	-0.230434	0.136008	31.1609	2.83851e-06	0.000410868	ZBTB12
Ldim_g11706	91.2944	-0.479777	0.259807	18.5413	0.000966942	0.028397	-
Ldim_g11781	379.432	-0.198235	0.219052	18.6595	0.000916719	0.0273618	apoeb
Ldim_g1179	778.645	0.461405	0.12045	31.1538	2.84805e-06	0.000410868	-
Ldim_g11861	75.4462	-0.416372	0.382105	19.7282	0.000565033	0.0201137	CLEC4E
Ldim_g11866	2873.6	-0.197868	0.131432	25.7494	3.55477e-05	0.00281066	Lypla2
Ldim_g11954	2559.99	0.300205	0.150154	34.2198	6.71694e-07	0.00012845	SSTR2
Ldim_g120	2976.41	-0.171927	0.159179	21.02	0.000313789	0.0132559	spns2
Ldim_g12018	7949.03	0.182333	0.113684	21.5409	0.000247317	0.0115449	-
Ldim_g12111	384.276	0.00804176	0.213569	20.4735	0.000402609	0.0158784	-
Ldim_g12114	478.486	0.31687	0.453865	16.9544	0.00197281	0.0451877	PDGFB
Ldim_g12132	495.679	-0.05095	0.285797	17.2437	0.00173312	0.041489	-
Ldim_g12136	457.296	0.598638	0.343733	18.3698	0.00104474	0.0300906	-
Ldim_g12193	166.521	-0.446998	0.35373	19.1804	0.000724321	0.0234492	Ints1
Ldim_g12225	330.679	0.0434332	0.230332	17.8663	0.0013106	0.0345972	-
Ldim_g12335	720.88	-0.3445	0.21943	22.1133	0.000190275	0.00982768	gfap
Ldim_g12352	3090.33	0.194553	0.125441	31.7421	2.15991e-06	0.000332855	Rusf1
Ldim_g12394	757.115	-0.00785355	0.131871	18.1792	0.00113843	0.031772	SNRNP25
Ldim_g12400	471.382	0.324714	0.189655	20.4037	0.00041561	0.016197	Unkl
Ldim_g12416	782.408	0.164041	0.619145	28.2687	1.10027e-05	0.00113805	cdc37
Ldim_g12435	364.706	-0.165848	0.178163	19.119	0.000744744	0.0237826	NR5A2
Ldim_g12463	148.128	3.43967	1.20419	51.2488	1.98039e-10	1.20628e-07	Adgrl1
Ldim_g12465	56.2446	0.293766	0.485357	49.7452	4.08145e-10	2.39727e-07	-
Ldim_g12475	314.373	-0.0171188	0.127947	23.2347	0.000113662	0.00660524	TRIM35
Ldim_g1249	485.526	-0.245753	0.189924	60.7653	2.00292e-12	1.83e-09	ZNF451
Ldim_g12492	262.65	-0.149794	0.235023	20.6861	0.000365422	0.0149444	TRIM39
Ldim_g12499	59.431	0.797121	0.355162	85.9773	9.41054e-18	3.86914e-14	znf750
Ldim_g12516	1738.42	0.297831	0.1447	19.4927	0.000628752	0.0216781	chmp6
Ldim_g12525	141.629	0.252353	0.281614	16.7591	0.0021527	0.0480369	FBXW9
Ldim_g12537	298.833	0.419839	0.319172	18.169	0.00114368	0.031772	MFSD11
Ldim_g12581	228.977	0.682352	0.344983	57.6649	8.97233e-12	7.02661e-09	GIMAP5
Ldim_g12584	1572.96	-0.101327	0.192307	21.4388	0.000259131	0.0119041	Prss36
Ldim_g12610	106.368	0.436232	0.393508	21.2248	0.000285767	0.0125998	-
Ldim_g12658	7082.79	0.212278	0.115707	28.4182	1.02607e-05	0.00107483	IFI44L
Ldim_g12690	645.91	0.154119	0.134673	30.6572	3.596e-06	0.000491639	PRRG4
Ldim_g12706	21.5481	0.22183	0.566377	19.5092	0.000624047	0.0216521	znf207
Ldim_g12731	3467.04	0.0416592	0.0998257	21.1161	0.000300312	0.0129972	OCM1
Ldim_g12748	6216.69	0.122594	0.124997	17.3717	0.00163652	0.0395235	Gid4
Ldim_g1278	115.018	-0.521678	0.204051	25.5724	3.85896e-05	0.00297818	HIPK2
Ldim_g1283	395.661	0.029146	0.160495	21.4101	0.000262563	0.0119947	ADK
Ldim_g12852	270.005	0.770746	0.462047	18.0744	0.00119347	0.0325688	-
Ldim_g1287	212.357	0.344797	0.358859	19.4496	0.000641161	0.0218934	chuk
Ldim_g12877	4822	0.289199	0.102424	21.3707	0.000267337	0.0120514	Gimap4
Ldim_g12881	17.5361	2.38423	1.41073	20.9299	0.000326967	0.013648	NDUFA6
Ldim_g12886	785.606	0.325909	0.133818	25.4777	4.03207e-05	0.00305583	WBP2
Ldim_g12895	2366.21	0.0710766	0.186939	73.3993	4.34384e-15	7.14388e-12	EMP2
Ldim_g12897	195.152	0.60777	1.38352	18.3304	0.00106344	0.0303634	Cd9
Ldim_g12926	9247.08	-0.00197854	0.062963	21.1696	0.000293064	0.0127506	mcm5
Ldim_g12933	561.342	-0.172716	0.130304	18.2904	0.0010828	0.0305564	S1pr1
Ldim_g12979	1510.65	-0.0337939	0.1824	23.3496	0.000107806	0.00635478	-
Ldim_g12986	911.81	-0.0729921	0.084552	18.0926	0.00118371	0.0325539	RBFOX3
Ldim_g13011	4097.76	0.174754	0.11885	32.8607	1.27557e-06	0.000218521	hoatz
Ldim_g13016	1061.93	0.214429	0.264556	34.0605	7.24211e-07	0.000133824	Alg1
Ldim_g13047	9461.6	0.115461	0.0971988	20.4562	0.000405786	0.0159212	kank2
Ldim_g13064	3520.64	-0.448517	0.33101	33.8633	7.94861e-07	0.000143651	ilf3
Ldim_g13108	3519.6	0.1527	0.105255	19.3807	0.000661488	0.0222168	ZNF208
Ldim_g13126	4139.28	0.00963314	0.19453	23.8744	8.46393e-05	0.00529269	hoxb13a
Ldim_g13141	912.132	0.484446	0.208427	17.1214	0.00183075	0.0427072	NFE2L1
Ldim_g13147	114.91	-0.248918	0.315879	21.96	0.000204128	0.0102953	-
Ldim_g13156	2997.89	0.274422	0.199768	39.5325	5.40738e-08	1.71019e-05	PRKAR1B
Ldim_g1317	484.922	0.11673	0.248503	45.5237	3.09416e-09	1.4539e-06	PROKR1
Ldim_g13184	59.474	0.298428	0.486188	17.2876	0.00169937	0.0408594	-
Ldim_g132	146.625	0.923174	0.476415	21.9192	0.000207983	0.0103966	LOC115533546
Ldim_g13216	1502.49	0.0995296	0.106414	17.9757	0.00124767	0.0334188	sez6
Ldim_g13266	2369.61	-0.137182	0.0877509	25.5215	3.95106e-05	0.00301803	Dus1l
Ldim_g13268	775.91	-0.20458	0.110071	20.5428	0.000390089	0.0155697	CSNK1D
Ldim_g13291	19.8221	0.861235	0.692918	19.2479	0.000702512	0.023107	Snrnp48
Ldim_g13297	21396.2	-0.00633463	0.120292	16.928	0.00199623	0.0453552	TY3B-G
Ldim_g1336	220.06	0.0408046	0.242831	26.3479	2.69231e-05	0.00225907	ZCCHC24
Ldim_g13447	414.923	0.113427	0.226484	17.28	0.00170521	0.0409401	-
Ldim_g13465	1543.68	0.161016	0.0795599	18.1257	0.00116618	0.0321687	Hjv
Ldim_g1350	16125.9	0.201663	0.142107	21.175	0.000292344	0.0127506	cuedc2
Ldim_g13523	3863.56	-0.201372	0.24139	19.1359	0.000739061	0.0236688	-
Ldim_g13557	293.301	0.600092	0.334716	16.7199	0.00219075	0.0483343	CD33
Ldim_g13578	3020.37	-0.103111	0.210308	26.7578	2.2251e-05	0.0019888	Nlrp1b
Ldim_g13722	7152.21	0.0909625	0.13932	21.2886	0.000277557	0.0124041	Map3k5
Ldim_g13724	28.9966	0.734869	0.4423	18.1496	0.00115374	0.0319434	Thrap3
Ldim_g13745	3010.63	0.0115189	0.0642856	17.1635	0.00179655	0.0423903	maneal
Ldim_g13747	5032.77	0.211402	0.111302	22.1737	0.000185075	0.00963211	mecr
Ldim_g13758	1605.72	-0.125597	0.142782	17.6981	0.00141353	0.0359302	LOC115021605
Ldim_g13868	100.613	0.0577153	0.268682	17.8334	0.0013301	0.0348704	-
Ldim_g13950	1073.87	0.124594	0.17914	32.8141	1.30387e-06	0.000221066	Epn1
Ldim_g13989	439.209	0.131406	0.128362	17.5871	0.00148579	0.0370231	Lmtk3
Ldim_g1402	1095.31	-0.129328	0.106361	27.0375	1.95353e-05	0.00177898	-
Ldim_g14031	3729	0.00780208	0.202779	26.4922	2.5176e-05	0.00214672	GSDME
Ldim_g14039	1217.29	-0.622106	0.137163	39.1302	6.54816e-08	1.99428e-05	NHLRC1
Ldim_g14054	294.125	-0.102552	0.162783	17.4256	0.00159744	0.0389208	-
Ldim_g14071	2385.19	0.100635	0.0613587	17.9995	0.00123438	0.0332797	-
Ldim_g14153	405.364	-0.0315458	0.138276	18.6331	0.0009277	0.0275906	SHC1
Ldim_g14178	2800.85	-0.0695469	0.0974195	16.722	0.00218874	0.0483343	RUSC1
Ldim_g14258	72.0344	0.103738	0.481752	17.765	0.00137166	0.0353179	KLHL32
Ldim_g14264	2715.73	0.157998	0.138958	19.413	0.000651881	0.0220593	FAXC
Ldim_g14275	28.3429	1.96493	0.82957	26.6919	2.29437e-05	0.00200887	DOP1A
Ldim_g14295	171.999	0.425821	0.18301	17.5015	0.00154394	0.0381828	PLEC
Ldim_g14319	1120.38	0.150743	0.088165	17.0309	0.00190638	0.044096	ZADH2
Ldim_g14331	37.933	0.222576	0.65366	25.2752	4.42884e-05	0.00325164	MRPL32
Ldim_g14463	581.121	-0.201314	0.162708	38.5955	8.44372e-08	2.39423e-05	hdac9b
Ldim_g1447	935.396	0.00308037	0.137071	30.7028	3.51989e-06	0.000486455	ZDHHC13
Ldim_g14479	33.1447	0.52769	0.593605	19.3289	0.00067722	0.0225001	Obscn
Ldim_g1448	6072.68	0.47379	0.152334	22.0577	0.000195193	0.0100317	WDFY4
Ldim_g14493	13424.2	0.293834	0.11814	21.9472	0.00020533	0.0102953	hcst
Ldim_g14572	2371.85	0.0174038	0.129633	18.6795	0.00090846	0.0272638	LOC112163327
Ldim_g1458	12478.6	0.347607	0.124958	23.2863	0.000110993	0.00649607	CXCL10
Ldim_g14683	2752.05	-0.163124	0.393693	48.1064	8.96805e-10	4.91629e-07	LOC107373506
Ldim_g14701	906.296	0.523113	0.174585	64.3039	3.60649e-13	3.95415e-10	LOC117462529
Ldim_g14760	2518.56	-0.0052648	0.159341	17.9833	0.00124342	0.0333594	-
Ldim_g14780	62.7697	1.04222	0.337391	17.8383	0.00132719	0.0348704	Phf20
Ldim_g1479	494.12	0.389979	0.192508	17.5977	0.00147872	0.0370152	EPHX1
Ldim_g14793	4591.82	-0.169572	0.176763	18.3045	0.00107592	0.0305564	PGBD2
Ldim_g14802	2108.83	-0.0313515	0.150858	25.8014	3.47006e-05	0.00277318	KCND1
Ldim_g1484	1122.68	-0.594489	0.202474	24.2331	7.17252e-05	0.00475642	MGME1
Ldim_g14842	15.9407	2.5719	1.31789	24.2819	7.01269e-05	0.00470738	-
Ldim_g14847	7914.1	0.0622303	0.185156	21.0505	0.000309447	0.0132186	GRM8
Ldim_g14916	1608.54	-0.48717	0.237333	77.792	5.11229e-16	9.34187e-13	AGMAT
Ldim_g1493	1270.53	0.274756	0.137713	20.2902	0.000437649	0.0168562	TMEM63B
Ldim_g14949	6274.93	0.0534172	0.120845	18.3037	0.00107632	0.0305564	Sowahb
Ldim_g150	957.65	-0.185617	0.185617	31.8687	2.035e-06	0.000318738	ripply1
Ldim_g1500	972.827	0.480915	0.194809	21.6954	0.000230432	0.0111032	-
Ldim_g15043	215.76	0.329096	0.282507	20.6407	0.000373072	0.0150406	DUSP7
Ldim_g15112	839.449	7.44751	2.43006	20.8632	0.000337075	0.0140343	krt8
Ldim_g15156	840.215	0.204367	0.201733	20.3262	0.000430538	0.0166336	Opn5
Ldim_g15228	4903.27	-0.242847	0.0876574	23.3838	0.000106123	0.0063007	RND1
Ldim_g15230	3057.44	0.113471	0.0915328	17.1482	0.0018089	0.0424381	Cacnb3
Ldim_g15244	394.478	0.29346	0.227134	19.4486	0.000641443	0.0218934	DLGAP4
Ldim_g1532	674.393	-0.190013	0.448651	17.4662	0.00156859	0.0386478	pcdh15a
Ldim_g15362	22456.2	0.190786	0.162538	19.8721	0.000529276	0.0190054	Apeh
Ldim_g15385	7359.95	0.244347	0.200343	18.7336	0.000886541	0.0268016	ntf7
Ldim_g15411	159.589	-0.420632	0.281149	22.2413	0.000179424	0.00946009	Fkbpl
Ldim_g15420	832.522	0.209948	0.184901	19.2107	0.000714456	0.0233822	hoxc1a
Ldim_g15425	1058.28	0.104699	0.279938	17.6294	0.00145784	0.036604	hoxc9
Ldim_g15446	2614.13	0.185555	0.100129	19.7462	0.000560436	0.0199934	wnt10b
Ldim_g1545	50.9768	0.818407	0.390376	16.9305	0.00199394	0.0453552	itprip
Ldim_g15485	2264.56	-0.127292	0.163755	29.2196	7.05412e-06	0.000814915	CERK
Ldim_g155	1091.02	-0.203282	0.23618	38.0211	1.10941e-07	2.99104e-05	AKT2
Ldim_g15500	15798.7	-0.180593	0.0696659	18.9639	0.000798899	0.02479	Scn8a
Ldim_g15504	964.531	0.178941	0.148136	18.629	0.000929416	0.0275906	LARP4
Ldim_g15510	130.713	0.641533	0.328515	22.3333	0.000172009	0.0092145	FANCE
Ldim_g15536	4557.82	0.100867	0.137394	20.6542	0.00037078	0.0150193	Nfya
Ldim_g15573	510.233	-0.819586	0.268511	17.5301	0.00152424	0.0378094	tmem201
Ldim_g15612	61.6641	3.86622	1.92918	24.3717	6.72757e-05	0.00453703	ZNF362
Ldim_g15653	5778.25	-0.0684629	0.140717	17.6553	0.00144093	0.0362515	Hes5
Ldim_g15701	16.705	0.27436	1.43722	18.6702	0.000912284	0.027292	Snrpg
Ldim_g15703	99.3574	0.308115	1.08428	20.1963	0.000456753	0.0171894	TBC1D22B
Ldim_g15715	52.0181	-0.922758	0.452934	24.0897	7.66347e-05	0.00500133	gata5-b
Ldim_g15774	8902.14	0.163091	0.113059	30.6058	3.68383e-06	0.000492555	RNF223
Ldim_g15786	72.3784	0.113598	0.338544	18.4046	0.00102847	0.0298836	-
Ldim_g15812	3810.73	0.426348	0.291683	24.076	7.71211e-05	0.00501318	ZBTB17
Ldim_g15813	23.0425	0.685001	0.777735	24.2495	7.11849e-05	0.00475113	HSPB7
Ldim_g15853	2703.14	0.577134	0.363375	64.6967	2.98095e-13	3.62645e-10	Arfgef2
Ldim_g15874	1121.1	0.933791	0.425543	20.4552	0.000405981	0.0159212	Apeh
Ldim_g15895	1051.52	-0.097796	0.0829567	21.206	0.000288232	0.0126745	Cep104
Ldim_g1594	459.265	-0.134219	0.206661	17.1528	0.00180519	0.0424172	Agt
Ldim_g15962	2671.79	0.223158	0.130892	17.091	0.00185583	0.0431696	-
Ldim_g16000	6117.67	-0.0815018	0.11812	17.3683	0.001639	0.0395235	LACTBL1
Ldim_g16035	4743.32	0.182256	0.0740064	17.7571	0.00137655	0.0353179	LOC111221583
Ldim_g16044	2460.4	0.159808	0.16798	21.4871	0.000253475	0.0117147	-
Ldim_g16062	1186.78	0.0881698	0.265431	19.3205	0.000679776	0.0225395	GRIN3A
Ldim_g16071	3165.86	-0.243638	0.29265	28.2034	1.13432e-05	0.0011587	-
Ldim_g16073	255.694	-0.438101	0.230114	20.0459	0.000489081	0.0178743	PTBP1
Ldim_g16101	904.489	-1.23462	0.687582	44.3292	5.48092e-09	2.37208e-06	ELAVL1
Ldim_g16102	71.8493	-0.130588	0.499317	35.5513	3.57864e-07	7.74399e-05	-
Ldim_g16103	4391.02	-0.095052	0.0922704	18.6692	0.000912721	0.027292	SLC1A7
Ldim_g1611	279.359	-0.168881	0.195954	17.7597	0.0013749	0.0353179	RGS7
Ldim_g16135	2075.95	-0.377176	0.339526	17.1825	0.00178136	0.0421593	NRDC
Ldim_g16138	2828.32	-0.0827881	0.240493	64.6246	3.0871e-13	3.62645e-10	RABGAP1L
Ldim_g16140	2793.43	0.348364	0.244784	16.9896	0.00194199	0.044731	Odf3l2
Ldim_g16188	511.314	0.0523138	0.218957	16.9677	0.00196109	0.044982	-
Ldim_g16207	3061.44	0.210968	0.0933645	22.8588	0.000135123	0.00758444	-
Ldim_g16227	691.511	-0.0176894	0.137395	20.6621	0.000369446	0.0150193	-
Ldim_g1627	217.2	0.44228	0.287019	19.1686	0.000728207	0.0234825	SPARC
Ldim_g16292	2450.33	-0.012791	0.0954208	19.1421	0.000736989	0.0236688	dcaf10
Ldim_g16314	175.392	0.393825	0.195844	22.1121	0.000190383	0.00982768	MDGA2
Ldim_g16331	62.0034	0.826163	0.324618	19.6588	0.000583097	0.0205345	foxg1
Ldim_g16347	3608.99	0.0922085	0.138108	21.9601	0.000204118	0.0102953	NIN
Ldim_g1639	845.614	-0.11542	0.218022	79.7469	1.97074e-16	4.05135e-13	Il22ra2
Ldim_g16414	289.962	0.15264	0.338895	60.4352	2.34997e-12	2.03408e-09	PAPLN
Ldim_g16433	281.005	-0.271872	0.142891	19.112	0.000747093	0.0238114	Pak2
Ldim_g16452	1158.94	0.0816615	0.318585	17.1244	0.00182824	0.0427072	GHSR
Ldim_g16509	744.311	-0.252547	0.119826	17.694	0.00141612	0.0359406	NKX2-1
Ldim_g16545	973.221	-0.264745	0.196338	20.4518	0.000406598	0.0159212	Vsnl1
Ldim_g16548	1565.44	0.210457	0.14737	24.3705	6.73133e-05	0.00453703	ADGRF3
Ldim_g16549	492.781	-0.279556	0.156448	19.9367	0.000513963	0.0187005	cenpo
Ldim_g16569	66.1475	-2.99295	0.979976	21.7618	0.000223534	0.0109412	Fut9
Ldim_g16603	2160.4	-0.0606331	0.131657	17.5905	0.00148348	0.0370217	-
Ldim_g16630	543.101	0.193418	0.342075	72.3743	7.1535e-15	1.06951e-11	Prlhr
Ldim_g16635	18.7936	1.1749	0.972872	17.8119	0.00134305	0.0349489	RPAP1
Ldim_g16643	2038.04	0.082894	0.732194	30.5673	3.75093e-06	0.000493502	ADAM17
Ldim_g16671	938.755	0.0218195	0.229824	31.2838	2.67923e-06	0.00039696	L1TD1
Ldim_g16672	989.459	-0.408586	0.23673	30.6447	3.61719e-06	0.000491639	colec11
Ldim_g16707	764.192	-0.0766482	0.25343	45.8935	2.59179e-09	1.25366e-06	WARS1
Ldim_g1671	1071.34	0.0486137	0.158521	20.6862	0.00036541	0.0149444	SRBD1
Ldim_g16781	971.488	-0.334435	0.302923	20.1362	0.000469412	0.0173873	tmem179
Ldim_g16785	589.442	0.0265172	0.126629	19.5146	0.000622531	0.0216451	Kif26a
Ldim_g16786	1150.73	0.185311	0.115016	29.2197	7.05379e-06	0.000814915	ASPG
Ldim_g1680	5039.51	0.137923	0.482628	23.8943	8.3866e-05	0.00526435	-
Ldim_g16832	139.192	-6.20883	1.86022	17.4277	0.00159594	0.0389208	Gpatch2l
Ldim_g16847	58.2859	-1.43826	0.541207	18.6104	0.000937239	0.0277227	FCF1
Ldim_g16857	1257.87	0.0175057	0.141852	20.9563	0.000323053	0.0135189	DLL4
Ldim_g16907	258.767	-0.151833	0.219945	44.7937	4.38859e-09	2.00485e-06	ANKRD63
Ldim_g1705	1728.41	0.0718415	0.0891234	17.4555	0.00157617	0.0386891	WDPCP
Ldim_g17078	228.821	1.03552	0.578857	19.2811	0.000692038	0.022871	NLRC3
Ldim_g17085	1609.93	0.202927	0.13338	20.1496	0.000466559	0.0173279	-
Ldim_g17093	3380.63	-0.105862	0.0986858	18.46	0.00100309	0.0292498	KCNK5
Ldim_g17103	1839.62	0.399694	0.212552	115.853	4.10312e-24	3.37399e-20	rtn4ip1
Ldim_g17118	124.379	-0.235201	0.304076	27.7086	1.4289e-05	0.00140717	Gphn
Ldim_g1712	265.544	0.446132	0.363696	63.352	5.72159e-13	5.88108e-10	actr2
Ldim_g17123	231.592	0.189445	0.164956	18.9648	0.000798566	0.02479	Dglucy
Ldim_g17146	343.481	0.444131	0.142424	17.1298	0.00182389	0.0426681	GTF2IRD2B
Ldim_g1715	45.9381	0.806942	0.622679	21.038	0.000311226	0.0132259	MEIS1
Ldim_g17154	1149.39	0.144321	0.144281	20.9994	0.000316751	0.013323	-
Ldim_g17192	6674.23	-0.259909	0.0985863	24.6265	5.98009e-05	0.00413854	Pim2
Ldim_g17207	817.684	-0.156421	0.210664	19.5043	0.000625457	0.0216553	metap1
Ldim_g17240	1663.3	-0.271099	0.127713	17.1821	0.00178163	0.0421593	bag
Ldim_g17274	712.796	0.474172	0.191493	17.9447	0.00126522	0.0337788	-
Ldim_g1731	348.884	-0.317337	0.435168	21.8195	0.000217697	0.0107193	Thumpd2
Ldim_g17347	1007.1	-0.264998	0.200562	18.0516	0.00120576	0.0327225	L1td1
Ldim_g17348	443.251	0.11107	0.153298	34.1807	6.8422e-07	0.00012912	-
Ldim_g17410	1892.73	0.115205	0.449883	19.184	0.000723154	0.0234492	Klhdc7a
Ldim_g17419	160.629	0.638252	0.225864	16.6593	0.00225083	0.0492445	-
Ldim_g17460	49.8236	-0.436278	0.382697	21.6468	0.000235613	0.0112305	ATP6AP1L
Ldim_g17461	679.856	-0.1542	0.134526	23.5695	9.74165e-05	0.00591185	PDE12
Ldim_g1748	8814.72	0.0156914	0.13727	21.6843	0.000231607	0.011105	MTX2
Ldim_g17480	438.884	0.176766	0.29459	24.5764	6.1202e-05	0.00421141	ippk
Ldim_g17543	2134.83	0.0138721	0.136282	16.839	0.00207727	0.0469197	alas1
Ldim_g17554	353.63	0.123163	0.28035	21.5366	0.000247801	0.0115449	slc32a1
Ldim_g17606	813.061	0.295575	0.231822	41.0516	2.62257e-08	9.14856e-06	CFDP2
Ldim_g17610	1514.66	0.415702	0.254262	21.8891	0.00021087	0.0104772	-
Ldim_g17728	47.8685	-1.08778	0.429799	22.7396	0.000142735	0.00782474	-
Ldim_g17747	2040.63	0.262805	0.152307	60.0312	2.85743e-12	2.34966e-09	GOLT1A
Ldim_g17751	1989.54	0.480528	0.165076	19.6727	0.00057944	0.0204935	P2RY1
Ldim_g1776	1098.61	0.0192966	0.306671	18.5135	0.000979151	0.0286532	PDXK
Ldim_g17776	446.558	-0.125565	0.180828	23.6362	9.44667e-05	0.00577546	-
Ldim_g1782	281.518	0.0824988	0.160767	21.0968	0.000302975	0.013078	CBR1
Ldim_g17820	1411.17	0.161524	0.0822048	17.7786	0.0013633	0.0353179	MIIP
Ldim_g17866	216.483	0.0421772	0.315787	41.208	2.434e-08	8.88063e-06	ddi2
Ldim_g17896	1367.82	0.0384198	0.178564	20.4972	0.000398275	0.0157453	rdh10a
Ldim_g17901	68.315	-0.882852	0.325695	23.4614	0.000102394	0.00612972	LOC115359506
Ldim_g17966	1156.58	-0.349404	0.186322	29.3756	6.55745e-06	0.000787182	-
Ldim_g17987	3615.48	-0.0300699	0.0874546	22.2761	0.000176589	0.00942915	rae1
Ldim_g18017	810.486	-0.0223063	0.152367	16.761	0.00215086	0.0480369	Cldn19
Ldim_g18041	734.854	0.244231	0.22702	24.058	7.77662e-05	0.00502306	TAFA1
Ldim_g18095	1856.56	0.0431594	0.248234	39.3819	5.80906e-08	1.80256e-05	-
Ldim_g18112	21.3592	3.1134	2.51158	21.5653	0.000244569	0.0114919	TACC1
Ldim_g1812	25119	0.174704	0.0895198	41.1655	2.48394e-08	8.88063e-06	SPTBN1
Ldim_g18136	5330.67	0.0846997	0.125303	39.0844	6.69226e-08	2.00111e-05	TGM2
Ldim_g1815	1818.16	-0.224321	0.201844	17.2279	0.00174549	0.0417244	-
Ldim_g18171	1340.62	-0.0872199	0.131848	25.1605	4.67061e-05	0.0033988	CPNE5
Ldim_g18175	2990.9	0.00892041	0.0811253	21.9489	0.000205166	0.0102953	ZSCAN22
Ldim_g18179	1807.43	0.411977	0.123481	26.6966	2.28935e-05	0.00200887	Nek4
Ldim_g18180	77.5421	0.682372	0.353083	17.8232	0.00133622	0.0348704	Camk1d
Ldim_g18195	6775.1	0.0853752	0.181166	17.6543	0.0014416	0.0362515	FAM72A
Ldim_g18225	7348.96	-0.0198574	0.0907419	20.5782	0.000383856	0.0154182	ANKRD52
Ldim_g18240	471.65	-0.12533	0.344748	20.243	0.000447141	0.0169523	PMEL
Ldim_g1826	2557.83	-0.679538	0.473526	34.4454	6.03797e-07	0.000118215	dl
Ldim_g18262	356.686	-0.848844	0.417208	26.8429	2.13871e-05	0.00192203	Pfkfb4
Ldim_g18276	8250.4	-0.139243	0.0903589	21.2634	0.00028077	0.0125022	Vhl
Ldim_g1828	4782.87	0.825875	0.325847	48.6399	6.94126e-10	3.93641e-07	ppp1r3cb
Ldim_g18294	203.04	-0.292194	0.378243	24.451	6.48563e-05	0.00440755	tac3b
Ldim_g18300	1140.46	-0.521688	0.379288	31.975	1.93571e-06	0.000309075	Neurod4
Ldim_g18307	124.554	0.827783	0.414575	18.2896	0.00108321	0.0305564	ESPL1
Ldim_g18317	230.997	0.89461	0.38737	21.8722	0.000212509	0.0105269	Bhlhe40
Ldim_g1835	1095.33	-0.110096	0.118999	17.4612	0.00157214	0.0386478	CHT1
Ldim_g1839	6338.49	0.139323	0.117352	17.9901	0.00123959	0.0333219	Kif20b
Ldim_g18510	23298.1	-0.135222	0.161589	37.3878	1.49853e-07	3.91188e-05	LOC119025631
Ldim_g1862	6809.25	0.570595	0.222053	18.0731	0.00119415	0.0325688	Pim1
Ldim_g18639	1140.47	0.0271752	0.0928157	17.1908	0.00177473	0.0421593	-
Ldim_g18693	130.519	0.21683	0.363149	16.6708	0.00223932	0.0491046	-
Ldim_g18704	5163.53	0.0815279	0.0830265	21.2591	0.00028132	0.0125022	Gimap9
Ldim_g18720	956.244	0.172331	0.090041	18.3728	0.00104331	0.0300906	SNRPB
Ldim_g18736	601.95	0.137028	0.209434	18.5709	0.000954121	0.0281145	wnt4a
Ldim_g18742	1370.51	0.213381	0.111645	17.0372	0.00190101	0.0440338	RNF123
Ldim_g18745	1913.37	-0.813676	0.450381	20.109	0.000475261	0.017525	Rnf123
Ldim_g1875	96.3911	-0.107773	0.369156	19.7234	0.000566268	0.0201141	INPP5A
Ldim_g18759	3634.94	0.0174803	0.120395	17.7649	0.00137175	0.0353179	-
Ldim_g18781	444.674	-0.486204	0.338827	25.5633	3.87529e-05	0.00297818	or131-2
Ldim_g18825	1064.64	-0.056029	0.221933	20.4121	0.000414026	0.0161736	G2E3
Ldim_g18836	960.037	0.225092	0.136977	29.8216	5.32123e-06	0.000668037	pol
Ldim_g18840	2998.15	0.186065	0.121343	36.6464	2.13017e-07	5.00469e-05	LOC115359266
Ldim_g18869	35.4045	0.334626	0.404239	17.4328	0.0015923	0.0389208	-
Ldim_g18891	209.723	0.620927	0.211651	22.807	0.000138376	0.00771435	Trim16
Ldim_g18974	234.185	1.08272	0.30336	17.7596	0.00137497	0.0353179	VPS54
Ldim_g19016	37.2402	0.375531	0.816146	21.6729	0.000232813	0.0111304	si:dkey-9i23.16
Ldim_g19043	493.112	0.43871	0.149733	31.5144	2.40399e-06	0.000362716	-
Ldim_g19133	66.3523	-0.875045	0.314108	33.6556	8.76762e-07	0.000153396	-
Ldim_g19173	1771.82	0.243422	0.132278	23.7613	8.91749e-05	0.00555519	L1TD1
Ldim_g19241	46.6615	0.829016	0.895935	24.2442	7.13565e-05	0.00475113	P4HB
Ldim_g1927	377.907	-0.429177	0.29032	41.0139	2.67014e-08	9.14856e-06	-
Ldim_g19285	9406.67	0.129968	0.108288	19.0168	0.000779994	0.0244805	Zfp184
Ldim_g19304	390.984	-0.341443	0.334043	29.2976	6.80114e-06	0.000804688	hist2h3c//si:dkey-261m9.8//si:ch73-36p18.2//zgc:162611//si:dkey-108k21.25
Ldim_g19309	328.029	0.202295	0.192146	28.4959	9.89473e-06	0.00105668	Ddx5
Ldim_g1932	754.041	0.352246	0.288106	17.5023	0.00154339	0.0381828	PCGF6
Ldim_g19339	174.359	-0.949382	0.479997	24.0547	7.7884e-05	0.00502306	MRC1
Ldim_g19410	6057.76	0.222986	0.144465	34.6846	5.39257e-07	0.000106851	Triobp
Ldim_g19417	224.117	0.061403	0.205413	16.7554	0.00215632	0.0480526	-
Ldim_g1947	502.073	0.339708	0.180021	19.1339	0.00073974	0.0236688	-
Ldim_g19471	608.05	-0.0789726	0.147422	21.3772	0.000266538	0.0120514	Fbxo10
Ldim_g19524	3859.61	0.110313	0.140837	16.8362	0.0020798	0.0469197	AIP
Ldim_g19536	7420.79	0.0187222	0.0942823	23.3562	0.000107476	0.00635478	NDST4
Ldim_g19565	858.632	-0.669148	0.576792	25.7992	3.47364e-05	0.00277318	smu1
Ldim_g19584	685.451	0.570433	0.13908	24.867	5.35036e-05	0.00380918	SYNPO2
Ldim_g19618	12625.5	-0.26081	0.157267	22.1093	0.000190626	0.00982768	cxxc4
Ldim_g19619	709.405	-0.247803	0.165334	21.6124	0.000239353	0.0113115	-
Ldim_g19630	717.953	0.990226	0.438157	51.5116	1.74506e-10	1.10382e-07	DKK2
Ldim_g19645	114.837	1.11294	0.525774	16.8101	0.00210421	0.0472757	Bnc2
Ldim_g19689	852.927	-0.222925	0.263058	21.7546	0.000224272	0.0109447	ARHGAP10
Ldim_g19724	127.854	0.0659565	0.211428	16.7256	0.00218516	0.0483343	tll1
Ldim_g1979	923.765	-0.0879539	0.0793358	16.9295	0.00199488	0.0453552	EDARADD
Ldim_g19812	6325.19	0.18622	0.143469	20.1983	0.000456346	0.0171894	REXO5
Ldim_g19848	1242.95	0.118733	0.0961964	24.6827	5.82676e-05	0.00407774	MEFV
Ldim_g19853	375.736	-0.056361	0.166457	19.3822	0.000661044	0.0222168	MICALL2
Ldim_g19871	1530.74	-0.34237	0.229451	24.6943	5.79561e-05	0.00407327	DNHD1
Ldim_g19900	612.184	0.00366131	0.146217	23.1603	0.000117623	0.00681135	Gtpbp1
Ldim_g19949	351.729	0.387088	0.206709	26.0575	3.08112e-05	0.00257219	cxcl12
Ldim_g1997	19.3361	3.24562	1.34858	16.7181	0.00219247	0.0483343	TRPA1
Ldim_g20001	14.4776	1.6755	1.61035	19.2699	0.000695549	0.0229238	RASD2
Ldim_g20030	256.138	1.02202	0.347375	85.153	1.40771e-17	4.63025e-14	zgc:136864
Ldim_g20086	254.519	0.294585	0.282984	24.668	5.86638e-05	0.00408807	Calhm1
Ldim_g20152	547.258	1.25572	0.366943	20.5752	0.000384376	0.0154182	Ddx17
Ldim_g20169	1962.11	0.100814	0.110667	26.6838	2.30297e-05	0.00200887	NOMO1
Ldim_g20195	77.6564	0.301404	0.614785	36.0766	2.7906e-07	6.37421e-05	CD22
Ldim_g20209	801.708	0.243309	0.127565	22.9171	0.000131546	0.00746001	-
Ldim_g2025	7113.22	-0.152699	0.106795	18.1624	0.00114711	0.0318134	eif3a
Ldim_g203	793.331	-0.174802	0.178722	18.1951	0.00113032	0.0316681	Sytl2
Ldim_g20320	4697.91	-0.122073	0.0952501	20.3245	0.000430858	0.0166336	-
Ldim_g20353	81.8404	1.1646	0.610732	24.5415	6.2198e-05	0.00426212	LOC115567168
Ldim_g20379	2760.41	-0.0547535	0.120383	16.9973	0.00193525	0.0446384	LOC121813534
Ldim_g204	390.581	-0.599661	0.329051	17.8274	0.00133369	0.0348704	-
Ldim_g20404	1766.45	0.00702056	0.123719	17.7819	0.00136131	0.0353179	SYK
Ldim_g20405	1568.76	-0.104626	0.135613	20.1508	0.000466307	0.0173279	-
Ldim_g20408	282.566	-0.106149	0.269313	25.7677	3.5248e-05	0.00280043	-
Ldim_g2041	1073.07	0.0314155	0.140146	35.3037	4.02366e-07	8.48373e-05	Acss1
Ldim_g20410	930.168	-0.245973	0.211529	19.6816	0.000577115	0.0204552	AUH
Ldim_g20434	208.391	0.858597	0.328512	21.5836	0.000242529	0.0114287	URM1
Ldim_g20466	455.029	0.122594	0.145036	18.3742	0.00104266	0.0300906	sh2d3ca
Ldim_g20493	620.068	0.0969533	0.299667	29.21	7.08578e-06	0.000814915	SLC27A4
Ldim_g20519	894.909	0.354465	0.341129	25.8786	3.34793e-05	0.00273931	-
Ldim_g20552	768.433	0.357059	0.283266	25.4486	4.08684e-05	0.00306905	PALM2
Ldim_g20612	5574.55	0.143066	0.0955396	29.3045	6.77927e-06	0.000804688	htr1a-B
Ldim_g20617	1315.53	0.207407	0.23465	19.6374	0.000588813	0.0206915	Gadd45g
Ldim_g20619	1772.75	0.0390583	0.128787	18.0475	0.00120799	0.0327293	Gadd45g
Ldim_g20694	7129.54	0.118408	0.143106	17.0877	0.00185859	0.0431728	-
Ldim_g20778	31760.5	0.0231886	0.145758	19.3523	0.000670066	0.0223075	LOC117808790
Ldim_g20785	1717.18	0.991568	0.490816	52.2959	1.19628e-10	7.86958e-08	GFRA2
Ldim_g20808	349.074	-0.511523	0.234555	16.6295	0.00228094	0.049751	hsdl2
Ldim_g20816	3366.35	0.487402	0.210692	22.2408	0.000179469	0.00946009	ATP6V1G1
Ldim_g2085	2256.41	0.395096	0.141239	21.0423	0.000310605	0.0132259	PRKG2
Ldim_g20984	1863.3	0.2161	0.0892134	34.7161	5.31286e-07	0.000106851	Zbtb7c
Ldim_g21012	277.856	-0.300862	0.216697	19.2042	0.000716565	0.0233822	setd1b
Ldim_g21036	28.5801	-5.08799	1.73015	23.9327	8.23961e-05	0.00521187	sdad1
Ldim_g21198	4523.79	0.184677	0.188744	28.1175	1.18076e-05	0.00119613	NPFFR2
Ldim_g21214	6986.97	0.457597	0.226308	30.7466	3.44819e-06	0.000480584	-
Ldim_g21236	132.649	-0.3749	0.563397	29.3945	6.4997e-06	0.000785985	GNAQ
Ldim_g21270	912.576	0.00700058	0.138757	35.4122	3.82233e-07	8.1639e-05	-
Ldim_g21277	172.972	0.695478	0.277742	21.7281	0.000227007	0.0109804	Dusp26
Ldim_g21349	14.3889	0.187465	0.677105	30.1484	4.56552e-06	0.000582051	-
Ldim_g21357	361.642	0.266331	0.310327	17.5685	0.00149825	0.0372772	rbm18
Ldim_g21359	1661.63	-0.00147162	0.160616	17.4465	0.00158253	0.0387873	morn5
Ldim_g21363	2244.82	0.25174	0.289956	56.3501	1.6933e-11	1.26582e-08	-
Ldim_g21379	52.2147	0.408287	0.364556	32.4808	1.5256e-06	0.0002509	LEAP2
Ldim_g21495	4099	0.636581	0.349219	26.4172	2.60698e-05	0.00219869	-
Ldim_g21499	1960.79	0.23703	0.0988215	21.4862	0.000253583	0.0117147	-
Ldim_g21517	102.528	0.966048	0.592073	20.7131	0.000360963	0.0149156	-
Ldim_g21523	31505.1	0.0914441	0.0953871	20.2496	0.000445803	0.0169523	-
Ldim_g21525	34507.3	-0.00191396	0.0706737	33.9098	7.77615e-07	0.000142096	-
Ldim_g21539	280.434	0.100952	0.148312	20.251	0.00044553	0.0169523	g6pc1
Ldim_g21556	85.9436	0.447555	0.335495	21.3259	0.000272863	0.0122275	DYDC1
Ldim_g21567	6061.45	-0.0876001	0.0843776	23.0509	0.000123694	0.00711281	htra1b
Ldim_g21576	7001.7	0.25314	0.255156	53.6702	6.16954e-11	4.22768e-08	Grid1
Ldim_g21589	94.027	0.379895	0.472961	17.464	0.00157016	0.0386478	-
Ldim_g21590	14.4024	1.70932	0.562767	18.9778	0.00079388	0.0247406	tbpl2
Ldim_g21593	7572.99	-0.321404	0.197727	18.3605	0.00104914	0.0301647	ANKFN1
Ldim_g21647	103.146	-0.00165281	0.257369	27.2	1.81109e-05	0.00167332	SLC16A3
Ldim_g21661	870.629	0.00812206	0.23253	21.8365	0.000216013	0.0106683	-
Ldim_g21718	4401.3	-0.170036	0.293139	20.5167	0.000394765	0.0156441	RPL38
Ldim_g21753	1329.12	0.195231	0.221506	25.5942	3.82011e-05	0.0029692	Cntd1
Ldim_g21765	554.571	0.149781	0.175771	21.9489	0.000205168	0.0102953	Nploc4
Ldim_g21783	520.609	-0.253826	0.11462	16.7224	0.00218827	0.0483343	HID1
Ldim_g21926	296.843	-0.782675	0.216131	26.9868	2.00012e-05	0.00180736	harbi1
Ldim_g21927	1902.56	-0.0572759	0.0698026	17.7625	0.00137321	0.0353179	PIGP
Ldim_g21951	9022.47	0.306501	0.161602	24.1423	7.47955e-05	0.00493264	NTN3
Ldim_g21965	62.4697	0.358317	0.300104	17.1593	0.0017999	0.0424086	-
Ldim_g22004	2109.21	0.0991293	0.16137	24.8179	5.47343e-05	0.00388	Gjb2
Ldim_g22020	3500.74	0.0173986	0.128823	46.1618	2.2791e-09	1.13582e-06	csf3a
Ldim_g22021	1510.98	-0.0592198	0.172916	17.8847	0.00129978	0.0343669	LRRC3B
Ldim_g22043	2995.74	-0.192977	0.138964	21.1275	0.000298762	0.0129642	aarsd1
Ldim_g22089	2194.14	0.0507705	0.0989587	17.1859	0.00177858	0.0421593	Foxl1
Ldim_g22152	593.39	0.384949	0.111528	16.9703	0.00195883	0.044982	Cdc42ep1
Ldim_g22215	3173.59	-0.229512	0.10212	20.5292	0.00039251	0.0155923	Chst15
Ldim_g22228	950.285	0.101338	0.227322	20.1249	0.000471837	0.0174378	chat
Ldim_g22232	4175.61	0.0661701	0.119349	22.7538	0.000141802	0.00782474	lrit2
Ldim_g2225	11118.2	0.0309422	0.11873	18.4676	0.000999644	0.029201	CXCL14
Ldim_g22261	7892.41	0.215398	0.119654	21.417	0.000261739	0.0119904	-
Ldim_g22279	749.091	0.0665166	0.167088	18.3565	0.00105104	0.0301665	dusp29
Ldim_g2228	783.396	0.0570014	0.226536	19.3713	0.000664319	0.0222168	-
Ldim_g22282	4822.02	-0.012626	0.0856021	34.7067	5.33644e-07	0.000106851	-
Ldim_g22317	2815.44	-0.0669989	0.153909	17.9462	0.00126432	0.0337788	Nt5c3b
Ldim_g22323	75.7906	0.0965776	0.339218	18.8358	0.000846529	0.0258152	Trim58
Ldim_g22331	3049.18	0.259244	0.180444	23.5912	9.64483e-05	0.00587478	Afap1l2
Ldim_g22366	439.338	1.38777	0.509274	70.4421	1.83088e-14	2.50922e-11	MPP3
Ldim_g22371	1598.9	-0.0628181	0.168802	18.9135	0.000817304	0.0252147	slc4a1
Ldim_g22438	287.964	0.0191846	0.24074	28.8684	8.31352e-06	0.000923812	rnps1-a
Ldim_g22452	3021.36	0.041088	0.236184	27.582	1.51582e-05	0.00146908	-
Ldim_g22496	874.127	0.185332	0.13992	27.3143	1.7172e-05	0.00161377	BMS1
Ldim_g22513	1225.79	-0.119945	0.17996	19.5746	0.000605829	0.0212441	CHRM3
Ldim_g22541	780.44	0.184612	0.215852	20.6579	0.000370162	0.0150193	-
Ldim_g22557	6935.36	0.109387	0.172346	25.716	3.61037e-05	0.00284096	-
Ldim_g22607	4656.43	0.178616	0.0965735	27.5655	1.5275e-05	0.00146908	CD81
Ldim_g22651	1803.69	0.211232	0.0993335	16.9337	0.00199115	0.0453552	CERS2
Ldim_g22675	586.182	0.220087	0.129269	41.3763	2.24638e-08	8.39636e-06	MTCH2
Ldim_g22687	3111.85	0.0357239	0.0968767	18.7641	0.000874393	0.026483	-
Ldim_g22709	3153.49	0.219395	0.089293	30.3325	4.18783e-06	0.000545727	TNNT3
Ldim_g22723	23965	0.117891	0.080022	28.3999	1.03488e-05	0.00107719	SOCS4
Ldim_g22737	2265.13	0.427398	0.131572	18.9263	0.000812594	0.0251202	tle3b
Ldim_g22745	34.5276	-0.140054	0.560929	20.5377	0.000390993	0.0155697	-
Ldim_g22785	6316.22	0.178959	0.0990649	31.574	2.33753e-06	0.000355953	LOC117810491
Ldim_g22821	3790.48	-0.244802	0.0793538	25.351	4.27608e-05	0.00315356	Gpa33
Ldim_g22845	1475.42	0.196635	0.167536	27.2402	1.7775e-05	0.00166095	GPALPP1
Ldim_g22861	1021.03	0.296086	0.160306	22.8763	0.00013404	0.00754937	PCDH17
Ldim_g22924	2496.31	-0.0820314	0.290116	27.5694	1.52473e-05	0.00146908	bdnf
Ldim_g22943	7896.69	0.0489131	0.0816033	28.5456	9.66757e-06	0.00104601	FAM189A1
Ldim_g22972	790.059	0.144314	0.158279	20.2559	0.000444535	0.0169523	Ric3
Ldim_g23022	1112.59	0.229647	0.0901475	29.5849	5.94531e-06	0.00072941	RNF111
Ldim_g23054	2498.85	0.0360331	0.176807	28.4976	9.88709e-06	0.00105668	slc38a8
Ldim_g23057	2784.49	-0.00525167	0.113448	22.7448	0.00014239	0.00782474	Got2
Ldim_g2374	2816.59	0.0557343	0.0981765	28.2437	1.1132e-05	0.00114423	NIPSNAP3A
Ldim_g2385	119.086	-0.0690512	0.415382	22.7553	0.000141704	0.00782474	Cox18
Ldim_g2432	379.941	-0.459892	0.20963	27.1009	1.89665e-05	0.00174259	NIPA2
Ldim_g2528	3412.44	0.199341	0.122652	35.8211	3.14959e-07	7.08085e-05	-
Ldim_g2550	7244.74	0.469366	0.149249	30.585	3.71997e-06	0.000493376	eif4e1a
Ldim_g2580	6057.93	0.217387	0.132015	22.6929	0.000145825	0.00796757	Sytl4
Ldim_g2593	4972.08	0.000718473	0.0925196	20.8148	0.000344589	0.0143109	TAF7
Ldim_g2599	267.782	-0.117055	0.183393	27.4324	1.62527e-05	0.00154504	-
Ldim_g2647	5623.56	0.0246086	0.136775	18.0175	0.00122444	0.0330659	CCDC85A
Ldim_g265	55.3677	-0.254064	0.868725	19.4135	0.00065174	0.0220593	CKAP2
Ldim_g2668	5269.94	-0.18681	0.100303	21.0726	0.000306341	0.0131543	Tgfb2
Ldim_g2679	4905.59	0.160383	0.0869033	18.9407	0.000807295	0.0250033	ARL3
Ldim_g2700	2393.69	-0.112222	0.0967163	17.1413	0.00181447	0.0425082	chrnb2
Ldim_g2712	59.6216	0.295237	0.60115	25.5146	3.96385e-05	0.00301803	-
Ldim_g2725	4152.51	0.117807	0.0857124	20.0121	0.000496657	0.0181109	SLC24A3
Ldim_g2810	4198.81	0.207898	0.206603	38.8075	7.63435e-08	2.20271e-05	PCDHGC5
Ldim_g2845	359.059	0.603114	0.352335	26.007	3.15414e-05	0.00261984	Ints5
Ldim_g285	5896.56	0.221436	0.19168	22.2468	0.000178979	0.00946009	JAM3
Ldim_g2888	1447.32	0.149112	0.268515	16.9025	0.00201911	0.0458017	TIMD4
Ldim_g2898	7869.83	-0.0340577	0.222646	18.8737	0.000832138	0.0254848	ATP7A
Ldim_g2915	1186.8	-0.246945	0.0951287	22.4506	0.000162996	0.00878895	Atrx
Ldim_g2953	110.768	0.088982	0.259017	18.6843	0.000906503	0.0272547	-
Ldim_g2958	98.384	1.08672	0.609244	19.5302	0.000618138	0.0215379	vma21
Ldim_g2980	2499.56	-0.0237446	0.126259	20.2514	0.000445452	0.0169523	ANKHD1
Ldim_g2991	54.5067	-0.819141	0.286481	18.3992	0.00103097	0.0299034	TNIP1
Ldim_g3014	713.566	-0.19321	0.230218	19.6642	0.000581677	0.0205285	-
Ldim_g3036	579.514	-0.485038	0.201806	21.5275	0.000248829	0.01156	LOC112073110
Ldim_g3039	3427.38	0.0162406	0.178254	18.9097	0.000818718	0.0252147	wnt8a
Ldim_g304	39.0046	7.02105	2.22383	27.3463	1.69183e-05	0.00159907	Tjap1
Ldim_g3041	2721.02	0.0164288	0.145199	20.1487	0.000466755	0.0173279	Lonrf1
Ldim_g308	455.016	0.152626	0.315114	19.0474	0.000769269	0.0242364	cnih2
Ldim_g3116	811.746	-0.391301	0.171168	16.6323	0.00227818	0.049751	BRD8
Ldim_g3146	4625.98	0.0361573	0.108407	21.9595	0.000204172	0.0102953	LOC114663090
Ldim_g3161	720.706	-0.0732223	0.130252	20.1589	0.000464589	0.0173279	-
Ldim_g3175	814.65	-0.145775	0.137357	40.056	4.21444e-08	1.38621e-05	Immt
Ldim_g3274	3048.29	0.115327	0.0770341	25.8314	3.422e-05	0.00275874	LOC109648121
Ldim_g3284	408.607	-0.015659	0.200011	17.1525	0.00180543	0.0424172	LOC115429228
Ldim_g3297	579.921	0.230743	0.297638	18.9822	0.000792296	0.0247406	hars1
Ldim_g3403	274.43	-0.362695	0.18489	29.7698	5.45188e-06	0.000679254	PALMD
Ldim_g347	2782.96	0.120923	0.123611	22.1972	0.000183093	0.0095592	gjb1
Ldim_g3518	1377.18	0.0639868	0.0906526	17.7394	0.00138751	0.0354744	ZNF658
Ldim_g3526	552.157	-0.0298737	0.235241	18.2852	0.00108537	0.0305651	1700123O20Rik
Ldim_g353	24533.3	0.0313978	0.134397	27.4603	1.60426e-05	0.00153393	-
Ldim_g3530	131.482	-11.1567	2.14794	25.8628	3.37255e-05	0.00274579	Homez
Ldim_g3531	378.563	-9.57917	2.11331	25.2596	4.46097e-05	0.00326067	ZP3
Ldim_g3533	41.6476	-1.27319	0.417802	19.1736	0.000726573	0.0234759	Nedd8
Ldim_g3534	97.7056	-9.18946	2.3995	18.5371	0.000968782	0.0284003	Ap1g1
Ldim_g3624	253.756	0.405865	0.173385	16.6708	0.00223936	0.0491046	Mpp7
Ldim_g3669	2637.77	-0.0122869	0.179334	18.309	0.00107376	0.0305564	Prg4
Ldim_g3675	1235.7	-0.265234	0.23616	29.8346	5.28884e-06	0.000668037	Plppr4
Ldim_g3711	2196.31	0.265051	0.176523	32.5394	1.48405e-06	0.000246533	LOC117826620
Ldim_g3726	205.807	0.0313124	0.250389	31.9403	1.9676e-06	0.000311146	Slc1a7
Ldim_g3747	1160.16	0.45066	0.304473	21.0161	0.00031435	0.0132559	RGS5
Ldim_g3795	775.869	-0.0801878	0.257312	34.4054	6.15313e-07	0.000119052	FAM78B
Ldim_g3808	10022.6	0.306298	0.21867	18.0881	0.00118613	0.032566	atp1b3
Ldim_g3809	2200.71	0.0250726	0.11425	17.91	0.00128508	0.034143	grk7a
Ldim_g3812	389.676	0.874616	0.357016	35.0395	4.55928e-07	9.49139e-05	zgc:110269
Ldim_g3885	10407.4	0.0601782	0.0658835	17.379	0.00163118	0.0395086	Clstn2
Ldim_g396	549.446	-0.367955	0.177803	28.8861	8.24515e-06	0.000922447	npm1
Ldim_g3965	36.6045	-3.02543	0.838652	16.975	0.00195471	0.044961	AKNA
Ldim_g3976	499.196	-0.315943	0.276321	19.1638	0.000729804	0.023488	Prss56
Ldim_g4011	123.141	0.365961	0.351583	28.8061	8.55956e-06	0.000944769	-
Ldim_g404	355.49	-0.096248	0.120186	19.367	0.000665613	0.0222168	GABRB4
Ldim_g4080	897.025	0.473881	0.200441	20.5575	0.000387482	0.0155049	-
Ldim_g4255	2165.97	-0.0651787	0.121419	19.495	0.000628082	0.0216781	RP1
Ldim_g4281	2463.08	0.0639214	0.234955	19.0502	0.000768297	0.0242364	TMEM14C
Ldim_g4299	6243.64	0.36156	0.123179	17.9894	0.00124	0.0333219	ST6GALNAC3
Ldim_g4301	183.088	0.373499	0.195885	20.0826	0.000480998	0.0176574	ACADM
Ldim_g4336	1069.71	-0.0912959	0.218755	25.3757	4.22744e-05	0.00313173	ptprf
Ldim_g4369	1558.3	-0.0911183	0.137387	18.9868	0.000790635	0.0247406	LOC118310563
Ldim_g4389	5088.94	-0.436602	0.339608	29.282	6.85104e-06	0.000804802	TMEM200C
Ldim_g4390	1029.47	0.373944	0.227884	19.0383	0.000772449	0.02429	-
Ldim_g4420	633.879	-0.549263	0.366392	47.5156	1.19075e-09	6.11971e-07	fzd8
Ldim_g443	57.2774	0.920082	1.08301	23.7123	9.12125e-05	0.00561828	srrt
Ldim_g445	740.022	0.0853317	0.172979	19.4479	0.000641652	0.0218934	NYAP1
Ldim_g446	3239.84	-0.535335	0.174959	47.7936	1.04206e-09	5.52829e-07	ATP1B2
Ldim_g4510	4573.71	0.0389815	0.100942	17.4732	0.00156369	0.0386134	-
Ldim_g4572	1798.42	-0.202676	0.0965184	16.6584	0.00225173	0.0492445	-
Ldim_g4593	28.3444	-0.487768	0.711065	21.737	0.00022608	0.0109679	-
Ldim_g4599	2183.28	-0.164586	0.129406	19.3757	0.000662992	0.0222168	sag
Ldim_g4640	4396.52	-0.661047	0.337963	21.3696	0.000267468	0.0120514	-
Ldim_g4641	4580.52	0.0671224	0.165459	18.1719	0.00114218	0.031772	Smg7
Ldim_g4668	2079.36	0.201134	0.169983	18.3878	0.00103627	0.0300044	-
Ldim_g4715	1125.15	0.354085	0.209546	21.5465	0.000246685	0.0115449	RNF31
Ldim_g4792	2500.95	0.449727	0.206249	16.9275	0.00199667	0.0453552	-
Ldim_g4814	334.787	-0.514299	0.253979	24.1369	7.49824e-05	0.00493264	MFSD6
Ldim_g4853	808.295	0.339375	0.329375	19.5337	0.000617171	0.0215379	-
Ldim_g4877	402.699	0.0135039	0.273304	25.59	3.8275e-05	0.0029692	ORC4
Ldim_g490	3164.53	-0.667022	0.298498	16.7475	0.00216387	0.0481198	Lrrn4
Ldim_g4940	3201.36	0.205683	0.094504	18.8581	0.000838045	0.025618	LOC121516128
Ldim_g4958	343.105	-0.175643	0.166594	29.5698	5.9875e-06	0.00072941	DHRSX
Ldim_g506	3333.14	0.0932446	0.0999067	22.2491	0.000178788	0.00946009	LOC115594306
Ldim_g5115	901.497	0.137852	0.155621	33.6942	8.60917e-07	0.000153396	LOC113027919
Ldim_g5155	146.902	0.589827	0.263797	17.3708	0.00163721	0.0395235	Trim25
Ldim_g5174	2881.42	0.403899	0.157419	17.1675	0.00179332	0.0423749	-
Ldim_g5176	10562.7	0.38007	0.200163	54.8931	3.42088e-11	2.44608e-08	Nhlh2
Ldim_g5186	460.756	-1.18158	1.02067	22.9725	0.000128238	0.00734846	DOCK9
Ldim_g5192	5187.6	0.110805	0.0833108	17.1951	0.00177131	0.0421593	NOP58
Ldim_g5194	4365.32	-0.200041	0.0921364	27.7967	1.37138e-05	0.00136145	CFAP47
Ldim_g5213	246.465	0.781264	0.304346	17.7334	0.00139128	0.0354744	KRT8
Ldim_g5215	104.832	1.73992	0.521025	23.7475	8.97445e-05	0.00556958	AAMP
Ldim_g5302	93.5601	-0.506077	0.329248	17.6781	0.00142626	0.0361422	-
Ldim_g5312	246.317	-0.64499	0.197364	21.4488	0.000257958	0.0118834	-
Ldim_g5315	13989.6	0.0660789	0.183841	16.793	0.00212034	0.0475083	-
Ldim_g5320	2056.02	-0.55782	0.295573	26.51	2.49689e-05	0.00214672	SPRY2
Ldim_g537	349.907	-0.141668	0.27031	22.5136	0.000158348	0.00856791	GABRR3
Ldim_g5378	13367.9	0.14744	0.105845	33.6606	8.74706e-07	0.000153396	Tlcd1
Ldim_g5451	283.753	0.0765557	0.359347	21.0182	0.000314053	0.0132559	HIC1
Ldim_g5455	107.315	-0.826902	0.327215	31.9835	1.92803e-06	0.000309075	-
Ldim_g5494	463.566	-0.125933	0.252103	23.4048	0.000105099	0.00626254	Cep57
Ldim_g5498	1109.38	0.263953	0.136181	21.3868	0.000265367	0.0120514	-
Ldim_g5505	327.829	-0.295497	0.213951	27.2114	1.80155e-05	0.00167332	LAYN
Ldim_g5591	11784.9	-0.129236	0.136019	18.2924	0.00108184	0.0305564	Slc13a2
Ldim_g5606	1977.27	-0.189923	0.108879	39.6692	5.06685e-08	1.63391e-05	-
Ldim_g5621	2070.73	0.0590101	0.179697	22.5514	0.000155624	0.0084748	Grm5
Ldim_g5626	1793.78	0.0579747	0.241317	18.0816	0.00118958	0.0325688	Numa1
Ldim_g5627	2676.2	0.140464	0.105667	19.8633	0.000531394	0.0190399	Lrrc51
Ldim_g564	280.175	-0.228924	0.418524	26.677	2.31026e-05	0.00200887	MIA
Ldim_g5676	2216.82	-0.271551	0.276171	17.3023	0.00168821	0.0406504	Neu4
Ldim_g5716	1081.79	0.152882	0.128186	32.229	1.71764e-06	0.000279686	P2RY1
Ldim_g5720	2103.71	0.321514	0.230631	17.251	0.00172752	0.0414152	GPR149
Ldim_g5748	361.239	0.294591	0.253539	17.8204	0.00133791	0.0348704	TRAPPC4
Ldim_g5813	5941.32	0.108085	0.136442	17.401	0.00161516	0.0392362	Nyap2
Ldim_g5832	581.545	-0.517444	0.188163	43.107	9.83225e-09	3.76049e-06	-
Ldim_g5844	5263.47	-0.0526555	0.112671	35.7968	3.18608e-07	7.08085e-05	OR11A1
Ldim_g5853	1027.7	-0.00866715	0.273811	24.5304	6.25189e-05	0.00426633	LOC109953614
Ldim_g5860	22325.1	0.137146	0.108072	24.7703	5.59521e-05	0.00394931	Rffl
Ldim_g5909	1501.87	0.0503759	0.0743772	22.8817	0.000133704	0.00754937	-
Ldim_g5985	412.251	-0.239223	0.161315	18.1719	0.00114219	0.031772	NOVA1
Ldim_g599	38.4752	0.344208	0.381863	17.7342	0.00139075	0.0354744	NLE1
Ldim_g6	193.743	-2.49238	0.619478	18.0623	0.00119996	0.0326417	LOC113037624
Ldim_g6035	1778.05	0.288395	0.129113	22.2325	0.000180149	0.0094656	VSIG10L2
Ldim_g6053	1459.95	-0.00978769	0.257896	21.6366	0.000236711	0.0112305	PGR
Ldim_g6174	491.679	0.0206419	0.236162	17.0734	0.00187047	0.0433875	ALDH3A2
Ldim_g6231	2435.5	0.323399	0.156275	28.7107	8.94971e-06	0.000974748	TAAR1
Ldim_g6243	3785.52	0.369801	0.212079	61.0432	1.75081e-12	1.69375e-09	-
Ldim_g6265	2762.86	0.152253	0.117328	34.7308	5.27604e-07	0.000106851	POU2AF1
Ldim_g6293	163.507	0.13924	0.20955	20.6814	0.000366205	0.0149444	crk
Ldim_g6306	75.7339	-1.28983	0.374965	16.9283	0.00199597	0.0453552	slc12a9
Ldim_g6320	80.5449	-0.394566	0.299736	19.4719	0.000634716	0.0217924	SERPINE2
Ldim_g633	1107.49	-0.0487655	0.118087	17.7513	0.00138011	0.035354	LOC115533546
Ldim_g639	921.661	0.0953912	0.106628	16.7143	0.00219626	0.0483529	hmgb1a
Ldim_g6433	375.98	0.0317145	0.211078	20.206	0.000454742	0.0171894	PF3D7_1122900
Ldim_g6437	1996.74	-0.0297783	0.115195	16.841	0.0020754	0.0469197	ETS1
Ldim_g6442	231.123	1.97983	0.85872	23.4839	0.000101337	0.0061047	KCNJ5
Ldim_g6455	25401.7	0.0099613	0.0945163	30.606	3.68353e-06	0.000492555	Glb1l2
Ldim_g6467	412.021	0.169254	0.311953	20.6403	0.000373133	0.0150406	MMP20
Ldim_g6471	89.3475	0.601894	0.377203	19.0925	0.000753713	0.0239297	GUCY2F
Ldim_g65	613.013	-0.144256	0.249131	36.8221	1.95985e-07	4.67125e-05	LOC117829128
Ldim_g651	5958.46	-0.168847	0.131736	22.2119	0.000181863	0.0095252	Stard13
Ldim_g6539	266.855	0.565283	0.224583	20.6976	0.000363514	0.0149444	-
Ldim_g6555	3903.82	-0.0121383	0.151736	27.7923	1.3742e-05	0.00136145	-
Ldim_g6556	1598.98	-0.282191	0.223258	21.3268	0.00027275	0.0122275	-
Ldim_g6602	1250.93	-0.1822	0.240819	43.6624	7.53991e-09	2.95369e-06	slc32a1
Ldim_g6620	38.9604	1.04251	0.362715	25.626	3.76419e-05	0.0029479	-
Ldim_g6640	820.134	0.352746	0.132543	19.2331	0.000707243	0.0232162	IYD
Ldim_g6669	1865.81	0.0952026	0.110554	20.0586	0.000486274	0.0178113	Cdc42bpb
Ldim_g668	420.412	0.218501	0.156123	19.4185	0.000650244	0.0220593	ufm1
Ldim_g673	1183.99	0.0971255	0.154725	28.472	1.00061e-05	0.00106168	Arfip2
Ldim_g6817	10234	0.111991	0.0629251	44.0742	6.19223e-09	2.61122e-06	CLEC11A
Ldim_g6830	3066.97	0.160903	0.0829106	19.3657	0.000665992	0.0222168	-
Ldim_g6859	516.077	0.66576	0.201502	24.9958	5.0408e-05	0.00362013	LOC110001099
Ldim_g6861	2751.47	0.313051	0.149666	25.902	3.31172e-05	0.00272323	TRDN
Ldim_g6871	81.9032	3.2503	2.07924	19.5371	0.000616213	0.0215379	aldh8a1
Ldim_g688	879.345	0.027428	0.107184	24.9469	5.15621e-05	0.00368692	Bach1
Ldim_g6898	14570.7	-0.099396	0.125994	23.9149	8.30721e-05	0.0052345	Fndc4
Ldim_g6907	281.489	-0.38812	0.15768	36.9434	1.85034e-07	4.6107e-05	ASAP2
Ldim_g6947	878.902	0.136882	0.140897	23.2636	0.000112158	0.00654097	Gpr6
Ldim_g6949	2734.01	0.0775031	0.145812	40.6798	3.13103e-08	1.05088e-05	AK9
Ldim_g6955	3294.01	-0.00732437	0.288189	20.1785	0.000460471	0.0172504	FAM110C
Ldim_g7056	1399.48	0.17493	0.117779	17.7759	0.00136496	0.0353179	G2E3
Ldim_g7130	4242.45	0.369845	0.130826	26.4908	2.51926e-05	0.00214672	Mycn
Ldim_g7166	5204.47	0.475438	0.254997	43.6615	7.54317e-09	2.95369e-06	riox1
Ldim_g7185	1633.23	-0.251745	0.129775	25.3834	4.21228e-05	0.00313173	NAGA
Ldim_g722	4151.3	-0.249891	0.337888	25.8368	3.41345e-05	0.00275874	Bicdl1
Ldim_g7274	3134.79	0.222025	0.183815	18.6018	0.00094092	0.0277816	YY1
Ldim_g7285	612.006	-0.210394	0.131134	18.6298	0.000929078	0.0275906	PLCB4
Ldim_g7342	23.5787	-0.575255	0.528987	16.6957	0.00221459	0.0486913	GTF2A1
Ldim_g7352	526.631	0.0537035	0.0964325	18.0775	0.0011918	0.0325688	NFKBIA
Ldim_g7435	203.509	0.384214	0.269033	29.1063	7.43804e-06	0.000843627	HIPK2
Ldim_g7487	6830.21	0.00155592	0.128308	21.897	0.000210103	0.0104707	-
Ldim_g755	1026.53	0.302519	0.336374	43.9568	6.54976e-09	2.69293e-06	CREBRF
Ldim_g7552	360.994	0.825238	0.313326	23.556	9.80281e-05	0.0059271	Vsnl1
Ldim_g757	371.611	1.20325	0.402908	92.3388	4.19319e-19	2.29871e-15	Stc2
Ldim_g7576	120.41	0.448999	0.242484	21.7458	0.000225173	0.0109562	Lire1
Ldim_g7585	1212.9	-0.0442948	0.367047	18.3004	0.00107795	0.0305564	LOC115590972
Ldim_g7608	1921.13	-0.636014	0.151971	29.1729	7.20994e-06	0.000823435	LOC113020645
Ldim_g7618	139.627	-0.219811	0.285126	18.6893	0.000904472	0.0272435	MRAS
Ldim_g7624	7491.1	-0.0147431	0.140377	31.1778	2.81602e-06	0.000410868	-
Ldim_g7673	451.759	-0.334332	0.118729	17.5454	0.00151383	0.0376081	IKZF2
Ldim_g7703	652.246	-0.214493	0.133099	22.9397	0.00013019	0.00740867	tc1a
Ldim_g7718	781.966	-0.117259	0.325966	30.2043	4.44732e-06	0.000571411	-
Ldim_g7726	242.747	2.61287	1.13706	23.4592	0.000102497	0.00612972	DHRSX
Ldim_g7734	773.503	0.0585501	0.170047	19.4199	0.00064985	0.0220593	ugt3
Ldim_g7758	639.779	0.0799719	0.374176	163.063	3.22003e-34	5.29566e-30	Wnt6
Ldim_g7759	386.412	-0.0526402	0.346896	35.6856	3.35832e-07	7.36413e-05	wnt10a
Ldim_g7760	268.339	0.0463617	0.283076	38.8421	7.5098e-08	2.20271e-05	-
Ldim_g7799	37.4074	-0.393553	0.875917	20.1794	0.000460281	0.0172504	rprma
Ldim_g7802	1071.81	0.58131	0.170962	17.6227	0.00146221	0.0366579	KCNJ3
Ldim_g7809	108.133	0.626816	0.429309	23.9985	7.99312e-05	0.00509515	ERMN
Ldim_g7859	128.757	-0.392149	0.295359	28.4573	1.00749e-05	0.00106213	DIP2A
Ldim_g7868	167.837	-0.0263918	0.227684	24.6232	5.98913e-05	0.00413854	SP5
Ldim_g7906	932.916	-0.267719	0.163585	21.2386	0.000283968	0.0125541	-
Ldim_g7924	545.954	0.115893	0.103209	19.914	0.000519294	0.0187771	mbnl2a
Ldim_g811	2157.39	0.883009	0.250179	18.8914	0.000825511	0.0253764	-
Ldim_g812	137.042	1.23168	0.304366	16.8032	0.0021107	0.0473568	LOC117805751
Ldim_g8122	314.757	-0.511901	0.395429	31.7365	2.1656e-06	0.000332855	nup35
Ldim_g8181	729.565	0.692554	0.213459	21.691	0.000230895	0.0111032	-
Ldim_g824	2896.84	-0.164868	0.135793	17.8924	0.00129532	0.0343041	slc37a2
Ldim_g8247	5770.95	0.0709175	0.0749138	37.1371	1.68791e-07	4.27066e-05	Tmprss3
Ldim_g828	2524.79	0.328752	0.126764	17.9245	0.00127673	0.033976	Ppm1e
Ldim_g8342	1345.87	0.394027	0.164829	23.0593	0.000123218	0.00711032	Adarb1
Ldim_g840	266.86	-0.0612351	0.187577	16.782	0.00213079	0.0476775	RAB24
Ldim_g8434	1239.48	0.267631	0.111721	23.9768	8.07359e-05	0.00512657	-
Ldim_g8452	1430.49	-0.146538	0.0990142	22.045	0.00019633	0.0100587	katnal1
Ldim_g8477	957.437	-0.043643	0.270311	29.0197	7.74569e-06	0.000872505	KLF12
Ldim_g8479	3197.04	-0.0985466	0.190768	20.7244	0.0003591	0.014876	-
Ldim_g8503	478.151	0.333378	0.204507	18.7022	0.000899187	0.027134	setdb1
Ldim_g8504	1364.5	-0.0315364	0.114233	19.1936	0.00072002	0.0234484	Cfap97d1
Ldim_g8524	30982.6	0.130702	0.0895903	25.0856	4.83553e-05	0.00350331	ITPRID2
Ldim_g855	8260.07	-0.307444	0.16066	17.6593	0.00143836	0.0362515	RBM41
Ldim_g8569	234.872	-0.443145	0.16348	17.4277	0.00159593	0.0389208	PRP2
Ldim_g8584	1159.81	0.235332	0.107607	28.1022	1.18919e-05	0.00119613	slc49a4
Ldim_g8594	596.65	-0.326706	0.178562	29.6549	5.75361e-06	0.000711458	-
Ldim_g8605	380.314	-0.497455	0.366768	32.9956	1.19697e-06	0.000207215	-
Ldim_g8615	968.529	0.326817	0.094774	18.3486	0.00105476	0.0301999	Tbc1d8
Ldim_g8739	41.3254	0.899784	0.547324	19.8767	0.000528174	0.0190054	-
Ldim_g8753	4177.54	0.24171	0.118458	19.2052	0.000716236	0.0233822	-
Ldim_g8754	1225.6	0.152377	0.16738	21.8019	0.000219465	0.0107741	Foxq1
Ldim_g8763	14107.9	-0.295321	0.177145	16.8504	0.00206666	0.0468159	MYLK4
Ldim_g8769	9190	0.0562895	0.103313	19.1809	0.00072416	0.0234492	pol
Ldim_g8797	423.911	-0.162611	0.237172	25.0495	4.917e-05	0.00354671	Mpdz
Ldim_g8864	336.589	-0.165432	0.271142	20.99	0.000318121	0.0133465	MELTF
Ldim_g8865	15.2202	-1.12035	1.7209	21.3886	0.000265158	0.0120514	dlg1l
Ldim_g888	1469.42	0.177242	0.20996	25.9389	3.25558e-05	0.00269052	ARHGEF12
Ldim_g8881	439.634	0.0846776	0.109292	19.0643	0.000763403	0.024161	zgc:65873
Ldim_g8908	5031.9	0.0356932	0.118614	27.6236	1.48668e-05	0.00145535	-
Ldim_g8929	7769.04	0.055979	0.0598028	26.4554	2.56109e-05	0.00217112	LOC116057006
Ldim_g8936	4674.39	0.183336	0.11029	22.5132	0.000158376	0.00856791	KNG1
Ldim_g8943	4269.9	0.0355662	0.186442	16.8263	0.00208908	0.0470643	-
Ldim_g8957	1971.21	0.0679044	0.0997065	17.8246	0.00133542	0.0348704	LURAP1
Ldim_g8960	440.388	0.0699725	0.409215	81.0475	1.04487e-16	2.45485e-13	cnfn-a
Ldim_g8985	2085.77	-0.0613787	0.0886376	18.0366	0.00121392	0.0328357	fcho1
Ldim_g9009	263.096	-0.546426	0.152342	17.8344	0.00132956	0.0348704	Ptprc
Ldim_g9051	1146.83	0.144292	0.237102	20.1009	0.000477017	0.0175504	NDUFS7
Ldim_g9065	118.44	-0.426161	0.698923	17.9275	0.00127503	0.033976	thbs4
Ldim_g9098	1715.89	0.121196	0.131144	26.7389	2.24476e-05	0.00199553	srek1ip1
Ldim_g9127	80.4505	-0.207696	0.297029	25.4601	4.06518e-05	0.00306679	hykk
Ldim_g9185	48.5542	0.794395	0.384158	19.8913	0.000524678	0.0189229	Mfn1
Ldim_g9254	320.306	-0.324259	0.877365	18.8269	0.000849934	0.0258374	QSOX1
Ldim_g9267	95.0449	3.07335	1.96581	18.142	0.0011577	0.0319992	Cdkn2c
Ldim_g9270	1722.29	-0.0811914	0.170016	18.1901	0.00113288	0.0316858	dmrta2
Ldim_g9303	1140.05	0.0751427	0.240795	18.0608	0.00120079	0.0326417	Gnaq
Ldim_g9329	89.0659	-0.250877	0.2083	19.7607	0.00055676	0.0199054	-
Ldim_g9395	218.933	-0.0343786	0.299479	34.1602	6.90903e-07	0.00012912	LOC100707471
Ldim_g9396	1672.57	-0.355213	0.164365	32.7191	1.36357e-06	0.00022883	oaz1a
Ldim_g9482	4002.89	0.410955	0.27286	36.8714	1.91462e-07	4.66933e-05	IL12RB2
Ldim_g9490	732.789	0.282964	0.271268	25.3888	4.20185e-05	0.00313173	Cyp2j6
Ldim_g9612	9274.14	0.512861	0.186338	18.7959	0.00086191	0.0261531	ANAPC4
Ldim_g9629	2000.45	-0.0569464	0.195634	19.4873	0.000630276	0.0216852	Slc34a2
Ldim_g9649	2851.83	0.306708	0.161557	21.0813	0.000305124	0.0131363	LPP
Ldim_g9655	1513.02	0.140595	0.0713478	17.4207	0.00160094	0.0389484	ZBTB11
Ldim_g968	18572.5	0.242069	0.116095	18.9766	0.000794299	0.0247406	FNIP1
Ldim_g9699	28.522	0.443054	0.726181	17.0125	0.00192217	0.044399	-
Ldim_g9727	48.2754	-2.43029	1.29496	30.8239	3.32538e-06	0.000467429	cyfip1
Ldim_g9753	1529.72	0.159102	0.189798	18.4236	0.00101967	0.0296806	CDKL5
Ldim_g9837	175.95	0.294647	0.182088	26.6672	2.32084e-05	0.00200887	si:dkeyp-51f12.3
Ldim_g9891	11752.4	0.0724656	0.0672871	18.8854	0.00082774	0.0253974	Col15a1
Ldim_g992	469.596	-0.446897	0.238527	37.258	1.59379e-07	4.09555e-05	Uimc1
Ldim_g993	441.486	-0.112485	0.158543	22.4372	0.000163997	0.00881405	Havcr2
Ldim_g9931	4423.07	0.120366	0.0777334	21.1821	0.000291396	0.0127506	-
Ldim_g9932	6472.98	-0.11149	0.0917055	17.6982	0.00141343	0.0359302	-
Ldim_g9957	327.939	-0.16718	0.335364	18.3463	0.00105588	0.0301999	LOC111609249
Ldim_g9982	1192.95	0.245911	0.1358	17.1094	0.0018406	0.0428761	LRRC31

## Sheet: Supp. Table 6
Supplementary Table 6. Over-represented Gene Ontology terms among genes significant in the timepoint LRT. GO_ID and GO_Name identify each term, GO_Category indicates the ontology (Biological Process, Cellular Component, Molecular Function), and P-Value/FDR give nominal and multiple-testing–corrected significance (Benjamini–Hochberg). Enriched categories include cellular/biological regulation, res…
GO_ID	GO_Name	GO_Category	FDR	P-Value
GO:0009987	cellular process	BIOLOGICAL_PROCESS	3.80164e-30	4.80652e-34
GO:0065007	biological regulation	BIOLOGICAL_PROCESS	4.5968e-13	2.13102e-15
GO:0050896	response to stimulus	BIOLOGICAL_PROCESS	7.35736e-12	3.72085e-15
GO:0050789	regulation of biological process	BIOLOGICAL_PROCESS	8.64066e-12	5.09816e-15
GO:0032501	multicellular organismal process	BIOLOGICAL_PROCESS	8.64066e-12	4.8869e-14
GO:0050794	regulation of cellular process	BIOLOGICAL_PROCESS	1.82648e-10	1.19048e-13
GO:0008152	metabolic process	BIOLOGICAL_PROCESS	1.82648e-10	1.23161e-14
GO:0032502	developmental process	BIOLOGICAL_PROCESS	7.07803e-06	6.56257e-10
GO:0048856	anatomical structure development	BIOLOGICAL_PROCESS	4.86958e-06	4.9254e-08
GO:0044238	primary metabolic process	BIOLOGICAL_PROCESS	1.8027e-05	1.89934e-07
GO:0051716	cellular response to stimulus	BIOLOGICAL_PROCESS	0.00027154	3.20429e-07
GO:0007275	multicellular organism development	BIOLOGICAL_PROCESS	0.00338105	4.13227e-06
GO:0048518	positive regulation of biological process	BIOLOGICAL_PROCESS	0.00055842	7.06026e-07
GO:0043170	macromolecule metabolic process	BIOLOGICAL_PROCESS	0.00930045	1.25427e-05
GO:0048731	system development	BIOLOGICAL_PROCESS	0.102351	0.000142345
GO:0009058	biosynthetic process	BIOLOGICAL_PROCESS	0.138518	0.000198484
GO:0048522	positive regulation of cellular process	BIOLOGICAL_PROCESS	0.160428	2.3664e-05
GO:0048523	negative regulation of cellular process	BIOLOGICAL_PROCESS	0.164106	2.48981e-05
GO:0032922	circadian regulation of gene expression	BIOLOGICAL_PROCESS	0.0502458	7.83503e-05
GO:0023052	signaling	BIOLOGICAL_PROCESS	0.0055751	8.92844e-05
GO:0048519	negative regulation of biological process	BIOLOGICAL_PROCESS	0.0961052	0.00157961
GO:0007154	cell communication	BIOLOGICAL_PROCESS	1.71033	0.0029553
GO:0007623	circadian rhythm	BIOLOGICAL_PROCESS	1.71033	0.00294464
GO:0048869	cellular developmental process	BIOLOGICAL_PROCESS	0.425621	0.000753376
GO:0071840	cellular component organization or biogenesis	BIOLOGICAL_PROCESS	0.472251	0.000855816
GO:0019222	regulation of metabolic process	BIOLOGICAL_PROCESS	0.536585	0.000995017
GO:0030154	cell differentiation	BIOLOGICAL_PROCESS	0.55237	0.0104757
GO:0048468	cell development	BIOLOGICAL_PROCESS	0.716724	0.0138947
GO:0016043	cellular component organization	BIOLOGICAL_PROCESS	2.17664	0.00431144
GO:0007399	nervous system development	BIOLOGICAL_PROCESS	4.48531	0.00907345
GO:0006950	response to stress	BIOLOGICAL_PROCESS	6.60118	0.136319
GO:0060255	regulation of macromolecule metabolic process	BIOLOGICAL_PROCESS	100.457	0.211685
GO:0007165	signal transduction	BIOLOGICAL_PROCESS	103.63	0.222738
GO:0009628	response to abiotic stimulus	BIOLOGICAL_PROCESS	148.096	0.330794
GO:0048513	animal organ development	BIOLOGICAL_PROCESS	160.655	0.365617
GO:0120036	plasma membrane bounded cell projection organization	BIOLOGICAL_PROCESS	181.556	0.0420836
GO:0032870	cellular response to hormone stimulus	BIOLOGICAL_PROCESS	18.905	0.446172
GO:0030030	cell projection organization	BIOLOGICAL_PROCESS	38.7427	0.0930688
GO:0071495	cellular response to endogenous stimulus	BIOLOGICAL_PROCESS	5.43663	1.32891
GO:0009893	positive regulation of metabolic process	BIOLOGICAL_PROCESS	1455.05	3.67933
GO:0080090	regulation of primary metabolic process	BIOLOGICAL_PROCESS	1471.26	3.78231
GO:0048583	regulation of response to stimulus	BIOLOGICAL_PROCESS	2805.04	0.732941
GO:0050793	regulation of developmental process	BIOLOGICAL_PROCESS	3230.85	0.85782
GO:0007610	behavior	BIOLOGICAL_PROCESS	4175.51	11.4383
GO:0048511	rhythmic process	BIOLOGICAL_PROCESS	859.786	2.42775
GO:0065008	regulation of biological quality	BIOLOGICAL_PROCESS	10979.3	31.9274
GO:0033554	cellular response to stress	BIOLOGICAL_PROCESS	16532	48.771
GO:0009892	negative regulation of metabolic process	BIOLOGICAL_PROCESS	19477.6	0.582816
GO:0010646	regulation of cell communication	BIOLOGICAL_PROCESS	2401.19	0.728614
GO:0009889	regulation of biosynthetic process	BIOLOGICAL_PROCESS	26368.9	8.22362
GO:0009059	macromolecule biosynthetic process	BIOLOGICAL_PROCESS	26726.5	8.44777
GO:0023051	regulation of signaling	BIOLOGICAL_PROCESS	2859.71	9.15955
GO:2000323	negative regulation of nuclear receptor-mediated glucocorticoid signaling pathway	BIOLOGICAL_PROCESS	2989.43	0.970103
GO:0010556	regulation of macromolecule biosynthetic process	BIOLOGICAL_PROCESS	30954.7	101.756
GO:0010467	gene expression	BIOLOGICAL_PROCESS	69483.5	23.1338
GO:0010605	negative regulation of macromolecule metabolic process	BIOLOGICAL_PROCESS	7007.31	236.255
GO:0009653	anatomical structure morphogenesis	BIOLOGICAL_PROCESS	957.296	32.6791
GO:0044085	cellular component biogenesis	BIOLOGICAL_PROCESS	100092	34.5901
GO:0009966	regulation of signal transduction	BIOLOGICAL_PROCESS	10963.1	38.3487
GO:0022008	neurogenesis	BIOLOGICAL_PROCESS	14580.4	51.6165
GO:0009719	response to endogenous stimulus	BIOLOGICAL_PROCESS	203836	73.0195
GO:0042221	response to chemical	BIOLOGICAL_PROCESS	25648.3	0.940409
GO:0009725	response to hormone	BIOLOGICAL_PROCESS	25648.3	93.0393
GO:0070887	cellular response to chemical stimulus	BIOLOGICAL_PROCESS	264383	9.80517
GO:0031175	neuron projection development	BIOLOGICAL_PROCESS	43971.7	1649.31
GO:0006139	nucleobase-containing compound metabolic process	BIOLOGICAL_PROCESS	523381	198.518
GO:0002376	immune system process	BIOLOGICAL_PROCESS	55697.8	2136.08
GO:0022607	cellular component assembly	BIOLOGICAL_PROCESS	61731.4	2393.5
GO:0010604	positive regulation of macromolecule metabolic process	BIOLOGICAL_PROCESS	64370.7	252.296
GO:0008283	cell population proliferation	BIOLOGICAL_PROCESS	77405.2	30.6645
GO:0030334	regulation of cell migration	BIOLOGICAL_PROCESS	1.1014e+06	4409.68
GO:0046683	response to organophosphorus	BIOLOGICAL_PROCESS	1.57235e+06	636.15
GO:0048666	neuron development	BIOLOGICAL_PROCESS	200213	818.471
GO:0051591	response to cAMP	BIOLOGICAL_PROCESS	2.0807e+06	859.361
GO:0035914	skeletal muscle cell differentiation	BIOLOGICAL_PROCESS	216643	903.898
GO:0010468	regulation of gene expression	BIOLOGICAL_PROCESS	265480	11188.5
GO:0045595	regulation of cell differentiation	BIOLOGICAL_PROCESS	3.16952e+06	13624.9
GO:0043434	response to peptide hormone	BIOLOGICAL_PROCESS	330646	14352.9
GO:0090304	nucleic acid metabolic process	BIOLOGICAL_PROCESS	3.60707e+06	15809.8
GO:0048699	generation of neurons	BIOLOGICAL_PROCESS	3.65592e+06	16178
GO:0040011	locomotion	BIOLOGICAL_PROCESS	396690	17721.3
GO:0048512	circadian behavior	BIOLOGICAL_PROCESS	487127	21966.7
GO:0035556	intracellular signal transduction	BIOLOGICAL_PROCESS	589061	2681.16
GO:2000145	regulation of cell motility	BIOLOGICAL_PROCESS	62123.7	2853.8
GO:0072303	positive regulation of glomerular metanephric mesangial cell proliferation	BIOLOGICAL_PROCESS	711399	3327.94
GO:0009891	positive regulation of biosynthetic process	BIOLOGICAL_PROCESS	866821	40915.4
GO:0051179	localization	BIOLOGICAL_PROCESS	1.39845e+07	67187.7
GO:0019538	protein metabolic process	BIOLOGICAL_PROCESS	1.53072e+06	7483.29
GO:0051239	regulation of multicellular organismal process	BIOLOGICAL_PROCESS	1.90428e+06	9389.77
GO:0045892	negative regulation of DNA-templated transcription	BIOLOGICAL_PROCESS	1.93795e+06	9637.48
GO:0030182	neuron differentiation	BIOLOGICAL_PROCESS	1.98162e+06	9938.16
GO:1902679	negative regulation of RNA biosynthetic process	BIOLOGICAL_PROCESS	1.99879e+07	101085
GO:0009648	photoperiodism	BIOLOGICAL_PROCESS	2.1795e+07	112061
GO:0045475	locomotor rhythm	BIOLOGICAL_PROCESS	2.31401e+07	122592
GO:0009605	response to external stimulus	BIOLOGICAL_PROCESS	2.31401e+07	122878
GO:0007622	rhythmic behavior	BIOLOGICAL_PROCESS	2.80648e+06	150212
GO:0006915	apoptotic process	BIOLOGICAL_PROCESS	3.05428e+06	164762
GO:0034654	nucleobase-containing compound biosynthetic process	BIOLOGICAL_PROCESS	3.21166e+07	17590.3
GO:0010557	positive regulation of macromolecule biosynthetic process	BIOLOGICAL_PROCESS	3.21166e+07	17595.9
GO:0060284	regulation of cell development	BIOLOGICAL_PROCESS	3.60631e+07	200621
GO:1903131	mononuclear cell differentiation	BIOLOGICAL_PROCESS	4.27742e+06	242729
GO:0008219	cell death	BIOLOGICAL_PROCESS	4.27742e+06	243363
GO:0007611	learning or memory	BIOLOGICAL_PROCESS	431878	24753.6
GO:0021595	rhombomere structural organization	BIOLOGICAL_PROCESS	4.51917e+06	260927
GO:0012501	programmed cell death	BIOLOGICAL_PROCESS	4.8291e+07	284927
GO:0009888	tissue development	BIOLOGICAL_PROCESS	4.8291e+07	28450
GO:0007166	cell surface receptor signaling pathway	BIOLOGICAL_PROCESS	4.85761e+06	288656
GO:0006810	transport	BIOLOGICAL_PROCESS	4.9686e+06	29734.5
GO:0040012	regulation of locomotion	BIOLOGICAL_PROCESS	5.23745e+06	31564.2
GO:0050890	cognition	BIOLOGICAL_PROCESS	5.29673e+07	3214.47
GO:0033036	macromolecule localization	BIOLOGICAL_PROCESS	5.43971e+06	332416
GO:0042127	regulation of cell population proliferation	BIOLOGICAL_PROCESS	5.57305e+06	34291.4
GO:0051234	establishment of localization	BIOLOGICAL_PROCESS	5.74124e+06	3556.82
GO:0006996	organelle organization	BIOLOGICAL_PROCESS	5.97199e+06	37249.5
GO:1901698	response to nitrogen compound	BIOLOGICAL_PROCESS	6.77649e+06	428386
GO:0045934	negative regulation of nucleobase-containing compound metabolic process	BIOLOGICAL_PROCESS	7.2956e+06	464277
GO:0016477	cell migration	BIOLOGICAL_PROCESS	7.30726e+06	46809.8
GO:1902531	regulation of intracellular signal transduction	BIOLOGICAL_PROCESS	768252	49537.5
GO:0071396	cellular response to lipid	BIOLOGICAL_PROCESS	1.00878e+08	65897.2
GO:0001938	positive regulation of endothelial cell proliferation	BIOLOGICAL_PROCESS	1.25649e+08	8490.48
GO:0016070	RNA metabolic process	BIOLOGICAL_PROCESS	1.35066e+08	92214.8
GO:0030098	lymphocyte differentiation	BIOLOGICAL_PROCESS	1.39105e+08	95558.3
GO:0051253	negative regulation of RNA metabolic process	BIOLOGICAL_PROCESS	1.41296e+07	97659.2
GO:0048870	cell motility	BIOLOGICAL_PROCESS	1.48521e+07	1.03279e+06
GO:0002682	regulation of immune system process	BIOLOGICAL_PROCESS	1.61082e+07	1.12692e+06
GO:0072301	regulation of metanephric glomerular mesangial cell proliferation	BIOLOGICAL_PROCESS	1.63505e+08	1.15077e+06
GO:2000026	regulation of multicellular organismal development	BIOLOGICAL_PROCESS	1.72624e+08	122222
GO:0051252	regulation of RNA metabolic process	BIOLOGICAL_PROCESS	1.80865e+08	1.28819e+06
GO:0021665	rhombomere 5 structural organization	BIOLOGICAL_PROCESS	1.98862e+08	1.45828e+06
GO:0021666	rhombomere 5 formation	BIOLOGICAL_PROCESS	1.98862e+08	1.45828e+06
GO:0021659	rhombomere 3 structural organization	BIOLOGICAL_PROCESS	1.98862e+08	1.45828e+06
GO:0021660	rhombomere 3 formation	BIOLOGICAL_PROCESS	1.98862e+08	1.45828e+06
GO:0019219	regulation of nucleobase-containing compound metabolic process	BIOLOGICAL_PROCESS	2.09916e+08	1.54819e+06
GO:2001141	regulation of RNA biosynthetic process	BIOLOGICAL_PROCESS	2.42866e+08	1.80143e+06
GO:0002521	leukocyte differentiation	BIOLOGICAL_PROCESS	2.49824e+08	1.86358e+06
GO:0033993	response to lipid	BIOLOGICAL_PROCESS	2.51411e+07	1.886e+06
GO:0000122	negative regulation of transcription by RNA polymerase II	BIOLOGICAL_PROCESS	2.53105e+08	190938
GO:0006351	DNA-templated transcription	BIOLOGICAL_PROCESS	2.62361e+07	1.99027e+06
GO:0051094	positive regulation of developmental process	BIOLOGICAL_PROCESS	2.62989e+08	2.01719e+06
GO:0007049	cell cycle	BIOLOGICAL_PROCESS	2.62989e+08	2.01201e+06
GO:0023057	negative regulation of signaling	BIOLOGICAL_PROCESS	2.91308e+08	224669
GO:0065009	regulation of molecular function	BIOLOGICAL_PROCESS	2.9167e+07	226177
GO:0006355	regulation of DNA-templated transcription	BIOLOGICAL_PROCESS	3.06885e+07	240562
GO:0048545	response to steroid hormone	BIOLOGICAL_PROCESS	3.21297e+08	2.53214e+06
GO:0141187	nucleic acid biosynthetic process	BIOLOGICAL_PROCESS	3.28581e+07	2.60339e+06
GO:0043067	regulation of programmed cell death	BIOLOGICAL_PROCESS	3.45938e+07	277007
GO:0030097	hemopoiesis	BIOLOGICAL_PROCESS	3.54753e+07	285560
GO:1901700	response to oxygen-containing compound	BIOLOGICAL_PROCESS	3.63111e+07	2.93819e+06
GO:0043068	positive regulation of programmed cell death	BIOLOGICAL_PROCESS	4.28703e+08	3.50507e+06
GO:0010558	negative regulation of macromolecule biosynthetic process	BIOLOGICAL_PROCESS	4.44454e+07	365258
GO:0048661	positive regulation of smooth muscle cell proliferation	BIOLOGICAL_PROCESS	4.48263e+08	371304
GO:0071505	response to mycophenolic acid	BIOLOGICAL_PROCESS	4.48263e+08	3.75945e+06
GO:0071506	cellular response to mycophenolic acid	BIOLOGICAL_PROCESS	4.48263e+08	3.75945e+06
GO:0021664	rhombomere 5 morphogenesis	BIOLOGICAL_PROCESS	4.48263e+08	3.75945e+06
GO:2000322	regulation of nuclear receptor-mediated glucocorticoid signaling pathway	BIOLOGICAL_PROCESS	4.54187e+07	3.82828e+06
GO:0014074	response to purine-containing compound	BIOLOGICAL_PROCESS	5.25928e+07	4.4773e+06
GO:0032774	RNA biosynthetic process	BIOLOGICAL_PROCESS	5.61465e+06	482716
GO:0010648	negative regulation of cell communication	BIOLOGICAL_PROCESS	6.09452e+07	526541
GO:1902895	positive regulation of miRNA transcription	BIOLOGICAL_PROCESS	6.12051e+07	53136.6
GO:0048585	negative regulation of response to stimulus	BIOLOGICAL_PROCESS	8.3897e+07	731907
GO:0042981	regulation of apoptotic process	BIOLOGICAL_PROCESS	8.59376e+07	753330
GO:0033089	positive regulation of T cell differentiation in thymus	BIOLOGICAL_PROCESS	8.81801e+07	776704
GO:0051641	cellular localization	BIOLOGICAL_PROCESS	8.95413e+07	792467
GO:0051254	positive regulation of RNA metabolic process	BIOLOGICAL_PROCESS	1.14275e+09	1.02581e+07
GO:0009314	response to radiation	BIOLOGICAL_PROCESS	1.34942e+08	1.22271e+07
GO:0003008	system process	BIOLOGICAL_PROCESS	1.42883e+08	1.30198e+07
GO:0045321	leukocyte activation	BIOLOGICAL_PROCESS	1.42883e+08	1.30671e+07
GO:0048609	multicellular organismal reproductive process	BIOLOGICAL_PROCESS	1.99628e+08	1.8509e+07
GO:0031400	negative regulation of protein modification process	BIOLOGICAL_PROCESS	2.10041e+09	1.96515e+06
GO:0051240	positive regulation of multicellular organismal process	BIOLOGICAL_PROCESS	2.18285e+08	2.05148e+07
GO:0051726	regulation of cell cycle	BIOLOGICAL_PROCESS	2.35624e+09	2.22437e+06
GO:0045935	positive regulation of nucleobase-containing compound metabolic process	BIOLOGICAL_PROCESS	2.43471e+08	2.30871e+06
GO:0009890	negative regulation of biosynthetic process	BIOLOGICAL_PROCESS	3.10032e+09	2.966e+07
GO:0050767	regulation of neurogenesis	BIOLOGICAL_PROCESS	3.30453e+08	3.18921e+06
GO:2000630	positive regulation of miRNA metabolic process	BIOLOGICAL_PROCESS	3.48246e+08	3.37561e+07
GO:0042592	homeostatic process	BIOLOGICAL_PROCESS	4.37554e+09	437037
GO:0009649	entrainment of circadian clock	BIOLOGICAL_PROCESS	4.59677e+08	4.61072e+06
GO:0043066	negative regulation of apoptotic process	BIOLOGICAL_PROCESS	4.71968e+09	4.77378e+07
GO:0098759	cellular response to interleukin-8	BIOLOGICAL_PROCESS	4.96247e+08	5.06119e+06
GO:0098758	response to interleukin-8	BIOLOGICAL_PROCESS	4.96247e+08	5.06119e+06
GO:0045893	positive regulation of DNA-templated transcription	BIOLOGICAL_PROCESS	5.06123e+08	5.18324e+06
GO:1902680	positive regulation of RNA biosynthetic process	BIOLOGICAL_PROCESS	5.1094e+08	5.2541e+06
GO:0031958	nuclear receptor-mediated corticosteroid signaling pathway	BIOLOGICAL_PROCESS	5.2165e+08	5.38622e+06
GO:1901654	response to ketone	BIOLOGICAL_PROCESS	5.877e+08	6.09298e+07
GO:0022414	reproductive process	BIOLOGICAL_PROCESS	6.07311e+08	6.32189e+06
GO:0071705	nitrogen compound transport	BIOLOGICAL_PROCESS	6.18356e+07	6.46292e+06
GO:0062197	cellular response to chemical stress	BIOLOGICAL_PROCESS	6.58243e+08	6.90755e+06
GO:0071363	cellular response to growth factor stimulus	BIOLOGICAL_PROCESS	6.66261e+08	7.01977e+06
GO:0043065	positive regulation of apoptotic process	BIOLOGICAL_PROCESS	7.77059e+08	821990
GO:0042752	regulation of circadian rhythm	BIOLOGICAL_PROCESS	8.36556e+08	8.88452e+06
GO:0061564	axon development	BIOLOGICAL_PROCESS	8.39948e+08	8.95595e+06
GO:0015031	protein transport	BIOLOGICAL_PROCESS	8.43217e+08	9.06189e+06
GO:0001936	regulation of endothelial cell proliferation	BIOLOGICAL_PROCESS	8.43217e+08	9.06167e+06
GO:0033077	T cell differentiation in thymus	BIOLOGICAL_PROCESS	8.53549e+07	920889
GO:0070848	response to growth factor	BIOLOGICAL_PROCESS	8.6751e+07	9.39607e+06
GO:0009968	negative regulation of signal transduction	BIOLOGICAL_PROCESS	8.79971e+08	9.60521e+06
GO:0060538	skeletal muscle organ development	BIOLOGICAL_PROCESS	8.9258e+07	9.81808e+06
GO:0060322	head development	BIOLOGICAL_PROCESS	9.02839e+08	996898
GO:0006366	transcription by RNA polymerase II	BIOLOGICAL_PROCESS	9.15548e+08	1.01479e+08
GO:0007519	skeletal muscle tissue development	BIOLOGICAL_PROCESS	1.00634e+09	1.1239e+08
GO:0043069	negative regulation of programmed cell death	BIOLOGICAL_PROCESS	1.03679e+10	1.16228e+08
GO:0008104	intracellular protein localization	BIOLOGICAL_PROCESS	1.1026e+09	1.24535e+08
GO:0007626	locomotory behavior	BIOLOGICAL_PROCESS	1.1026e+09	1.24225e+08
GO:0043153	entrainment of circadian clock by photoperiod	BIOLOGICAL_PROCESS	1.28346e+10	1.45503e+08
GO:0051960	regulation of nervous system development	BIOLOGICAL_PROCESS	1.35616e+10	1.54888e+08
GO:0002181	cytoplasmic translation	BIOLOGICAL_PROCESS	1.3619e+09	1.56118e+08
GO:0060086	circadian temperature homeostasis	BIOLOGICAL_PROCESS	1.39143e+10	1.6009e+08
GO:0060395	SMAD protein signal transduction	BIOLOGICAL_PROCESS	1.47441e+08	1.70879e+07
GO:0007616	long-term memory	BIOLOGICAL_PROCESS	1.47441e+08	1.70879e+07
GO:0061614	miRNA transcription	BIOLOGICAL_PROCESS	1.49977e+09	1.74451e+07
GO:2000182	regulation of progesterone biosynthetic process	BIOLOGICAL_PROCESS	1.545e+10	1.82316e+08
GO:0072223	metanephric glomerular mesangium development	BIOLOGICAL_PROCESS	1.545e+10	1.82316e+08
GO:0072262	metanephric glomerular mesangial cell proliferation involved in metanephros development	BIOLOGICAL_PROCESS	1.545e+10	1.82316e+08
GO:0021658	rhombomere 3 morphogenesis	BIOLOGICAL_PROCESS	1.545e+10	1.82316e+08
GO:0042492	gamma-delta T cell differentiation	BIOLOGICAL_PROCESS	1.56515e+10	1.85353e+08
GO:0006357	regulation of transcription by RNA polymerase II	BIOLOGICAL_PROCESS	1.63949e+10	1.94849e+07
GO:0032880	regulation of protein localization	BIOLOGICAL_PROCESS	1.69729e+10	2.02432e+08
GO:0045586	regulation of gamma-delta T cell differentiation	BIOLOGICAL_PROCESS	1.80105e+10	2.16327e+08
GO:1901701	cellular response to oxygen-containing compound	BIOLOGICAL_PROCESS	1.81206e+09	2.18412e+08
GO:0042921	nuclear receptor-mediated glucocorticoid signaling pathway	BIOLOGICAL_PROCESS	1.83049e+09	2.21406e+08
GO:0032879	regulation of localization	BIOLOGICAL_PROCESS	1.85918e+10	2.26379e+07
GO:0007167	enzyme-linked receptor protein signaling pathway	BIOLOGICAL_PROCESS	1.85918e+10	2.26442e+08
GO:0044092	negative regulation of molecular function	BIOLOGICAL_PROCESS	1.95544e+09	2.39815e+07
GO:0009416	response to light stimulus	BIOLOGICAL_PROCESS	2.00016e+10	2.46142e+07
GO:0046643	regulation of gamma-delta T cell activation	BIOLOGICAL_PROCESS	2.05842e+10	2.5418e+08
GO:0030335	positive regulation of cell migration	BIOLOGICAL_PROCESS	2.06786e+09	2.56217e+06
GO:0071375	cellular response to peptide hormone stimulus	BIOLOGICAL_PROCESS	2.12602e+10	2.64319e+08
GO:0046886	positive regulation of hormone biosynthetic process	BIOLOGICAL_PROCESS	2.1315e+10	2.65898e+08
GO:0014040	positive regulation of Schwann cell differentiation	BIOLOGICAL_PROCESS	2.21606e+10	2.82984e+08
GO:0048897	myelination of lateral line nerve axons	BIOLOGICAL_PROCESS	2.21606e+10	2.82984e+08
GO:0048938	lateral line nerve glial cell morphogenesis involved in differentiation	BIOLOGICAL_PROCESS	2.21606e+10	2.82984e+08
GO:0048932	myelination of posterior lateral line nerve axons	BIOLOGICAL_PROCESS	2.21606e+10	2.82984e+08
GO:0048931	posterior lateral line nerve glial cell differentiation	BIOLOGICAL_PROCESS	2.21606e+10	2.82984e+08
GO:0048942	posterior lateral line nerve glial cell morphogenesis involved in differentiation	BIOLOGICAL_PROCESS	2.21606e+10	2.82984e+08
GO:0048941	posterior lateral line nerve glial cell development	BIOLOGICAL_PROCESS	2.21606e+10	2.82984e+08
GO:0033081	regulation of T cell differentiation in thymus	BIOLOGICAL_PROCESS	2.31758e+10	2.97903e+08
GO:0009791	post-embryonic development	BIOLOGICAL_PROCESS	2.32648e+10	3.00026e+07
GO:1902532	negative regulation of intracellular signal transduction	BIOLOGICAL_PROCESS	2.35156e+08	3.04252e+07
GO:0042326	negative regulation of phosphorylation	BIOLOGICAL_PROCESS	2.55647e+10	3.31841e+07
GO:0007420	brain development	BIOLOGICAL_PROCESS	3.59757e+08	4.71529e+08
GO:0051246	regulation of protein metabolic process	BIOLOGICAL_PROCESS	4.08944e+09	5.41168e+07
GO:0046649	lymphocyte activation	BIOLOGICAL_PROCESS	4.14277e+09	5.49971e+07
GO:0008348	negative regulation of antimicrobial humoral response	BIOLOGICAL_PROCESS	4.3543e+09	5.79888e+07
GO:0014038	regulation of Schwann cell differentiation	BIOLOGICAL_PROCESS	4.51206e+09	6.10407e+07
GO:2000847	negative regulation of corticosteroid hormone secretion	BIOLOGICAL_PROCESS	4.51206e+09	6.10407e+07
GO:2000850	negative regulation of glucocorticoid secretion	BIOLOGICAL_PROCESS	4.51206e+09	6.10407e+07
GO:0048895	lateral line nerve glial cell differentiation	BIOLOGICAL_PROCESS	4.51206e+09	6.10407e+07
GO:0048937	lateral line nerve glial cell development	BIOLOGICAL_PROCESS	4.51206e+09	6.10407e+07
GO:1902893	regulation of miRNA transcription	BIOLOGICAL_PROCESS	4.58346e+09	6.21996e+07
GO:0032570	response to progesterone	BIOLOGICAL_PROCESS	4.64329e+10	6.34031e+07
GO:0046629	gamma-delta T cell activation	BIOLOGICAL_PROCESS	4.70374e+09	6.44266e+07
GO:0031399	regulation of protein modification process	BIOLOGICAL_PROCESS	5.06991e+09	6.96557e+07
GO:0051649	establishment of localization in cell	BIOLOGICAL_PROCESS	5.24616e+09	7.22984e+07
GO:0010628	positive regulation of gene expression	BIOLOGICAL_PROCESS	5.54456e+09	7.66443e+07
GO:0035924	cellular response to vascular endothelial growth factor stimulus	BIOLOGICAL_PROCESS	5.71533e+09	7.92458e+07
GO:0006412	translation	BIOLOGICAL_PROCESS	5.72095e+09	7.95648e+06
GO:0048858	cell projection morphogenesis	BIOLOGICAL_PROCESS	5.8146e+09	8.11122e+07
GO:0021594	rhombomere formation	BIOLOGICAL_PROCESS	5.83072e+10	8.20744e+07
GO:0021571	rhombomere 5 development	BIOLOGICAL_PROCESS	5.83072e+10	8.20744e+07
GO:0045184	establishment of protein localization	BIOLOGICAL_PROCESS	5.91327e+09	8.34855e+07
GO:0036211	protein modification process	BIOLOGICAL_PROCESS	5.93821e+10	8.43382e+07
GO:0002684	positive regulation of immune system process	BIOLOGICAL_PROCESS	6.2371e+09	8.91089e+07
GO:0050877	nervous system process	BIOLOGICAL_PROCESS	6.26556e+10	9.00437e+07
GO:0007267	cell-cell signaling	BIOLOGICAL_PROCESS	6.3713e+10	9.18318e+07
GO:0048812	neuron projection morphogenesis	BIOLOGICAL_PROCESS	6.41974e+09	9.28005e+06
GO:0007612	learning	BIOLOGICAL_PROCESS	6.56906e+09	9.52358e+07
GO:0051248	negative regulation of protein metabolic process	BIOLOGICAL_PROCESS	6.7551e+09	9.82177e+07
GO:2000628	regulation of miRNA metabolic process	BIOLOGICAL_PROCESS	6.81725e+09	9.9696e+07
GO:2000147	positive regulation of cell motility	BIOLOGICAL_PROCESS	7.37905e+09	1.08223e+08
GO:2000832	negative regulation of steroid hormone secretion	BIOLOGICAL_PROCESS	8.06873e+08	1.19698e+09
GO:0045597	positive regulation of cell differentiation	BIOLOGICAL_PROCESS	8.06873e+08	1.19592e+08
GO:0032868	response to insulin	BIOLOGICAL_PROCESS	8.18278e+09	1.21735e+09
GO:0006955	immune response	BIOLOGICAL_PROCESS	8.57701e+09	1.27961e+09
GO:0043412	macromolecule modification	BIOLOGICAL_PROCESS	8.72137e+09	1.30549e+09
GO:0051365	cellular response to potassium ion starvation	BIOLOGICAL_PROCESS	8.72137e+09	1.3174e+09
GO:0006290	pyrimidine dimer repair	BIOLOGICAL_PROCESS	8.72137e+09	1.3174e+09
GO:0021569	rhombomere 3 development	BIOLOGICAL_PROCESS	8.72137e+09	1.3174e+09
GO:0007417	central nervous system development	BIOLOGICAL_PROCESS	8.8524e+09	1.34308e+08
GO:0007517	muscle organ development	BIOLOGICAL_PROCESS	9.04466e+08	1.37606e+08
GO:0001935	endothelial cell proliferation	BIOLOGICAL_PROCESS	9.09684e+09	1.38783e+09
GO:0009056	catabolic process	BIOLOGICAL_PROCESS	9.27472e+09	1.41888e+08
GO:0030217	T cell differentiation	BIOLOGICAL_PROCESS	9.30015e+09	1.42669e+08
GO:0048584	positive regulation of response to stimulus	BIOLOGICAL_PROCESS	1.00147e+11	1.54896e+08
GO:0010586	miRNA metabolic process	BIOLOGICAL_PROCESS	1.00147e+11	1.54822e+09
GO:0001775	cell activation	BIOLOGICAL_PROCESS	1.03675e+11	1.6079e+08
GO:0042749	regulation of circadian sleep/wake cycle	BIOLOGICAL_PROCESS	1.11318e+11	1.73582e+09
GO:0051128	regulation of cellular component organization	BIOLOGICAL_PROCESS	1.12393e+11	1.75733e+09
GO:0048660	regulation of smooth muscle cell proliferation	BIOLOGICAL_PROCESS	1.1494e+11	1.80199e+09
GO:1902107	positive regulation of leukocyte differentiation	BIOLOGICAL_PROCESS	1.17712e+11	1.86033e+09
GO:1903708	positive regulation of hemopoiesis	BIOLOGICAL_PROCESS	1.17712e+11	1.86033e+09
GO:0072126	positive regulation of glomerular mesangial cell proliferation	BIOLOGICAL_PROCESS	1.24698e+11	1.9865e+09
GO:0072739	response to anisomycin	BIOLOGICAL_PROCESS	1.24698e+11	1.9865e+09
GO:0010720	positive regulation of cell development	BIOLOGICAL_PROCESS	1.38522e+11	2.2184e+09
GO:0120039	plasma membrane bounded cell projection morphogenesis	BIOLOGICAL_PROCESS	1.38985e+11	2.23168e+09
GO:1903706	regulation of hemopoiesis	BIOLOGICAL_PROCESS	1.4063e+11	2.26401e+09
GO:0072359	circulatory system development	BIOLOGICAL_PROCESS	1.60093e+11	2.59779e+09
GO:0098916	anterograde trans-synaptic signaling	BIOLOGICAL_PROCESS	1.60093e+11	2.60435e+09
GO:0007268	chemical synaptic transmission	BIOLOGICAL_PROCESS	1.60093e+11	2.60435e+09
GO:0050958	magnetoreception	BIOLOGICAL_PROCESS	1.70021e+11	2.78735e+09
GO:0050980	detection of light stimulus involved in magnetoreception	BIOLOGICAL_PROCESS	1.70021e+11	2.78735e+09
GO:1902105	regulation of leukocyte differentiation	BIOLOGICAL_PROCESS	1.76845e+11	2.90668e+09
GO:0051129	negative regulation of cellular component organization	BIOLOGICAL_PROCESS	1.89367e+11	3.13643e+08
GO:0070498	interleukin-1-mediated signaling pathway	BIOLOGICAL_PROCESS	1.89367e+11	3.12871e+07
GO:0071383	cellular response to steroid hormone stimulus	BIOLOGICAL_PROCESS	2.06495e+10	3.43752e+08
GO:0007613	memory	BIOLOGICAL_PROCESS	2.12496e+11	3.54638e+08
GO:0033002	muscle cell proliferation	BIOLOGICAL_PROCESS	2.16828e+11	3.62782e+07
GO:0006796	phosphate-containing compound metabolic process	BIOLOGICAL_PROCESS	2.30684e+09	3.88173e+09
GO:0010563	negative regulation of phosphorus metabolic process	BIOLOGICAL_PROCESS	2.30684e+09	3.88881e+09
GO:0045936	negative regulation of phosphate metabolic process	BIOLOGICAL_PROCESS	2.30684e+09	3.88881e+09
GO:0006793	phosphorus metabolic process	BIOLOGICAL_PROCESS	2.31133e+11	3.90663e+08
GO:0040008	regulation of growth	BIOLOGICAL_PROCESS	2.31133e+11	3.91585e+09
GO:0141124	intracellular signaling cassette	BIOLOGICAL_PROCESS	2.37102e+11	4.02698e+08
GO:0051402	neuron apoptotic process	BIOLOGICAL_PROCESS	2.40881e+10	4.11147e+08
GO:0006701	progesterone biosynthetic process	BIOLOGICAL_PROCESS	2.44769e+11	4.19846e+09
GO:0021654	rhombomere boundary formation	BIOLOGICAL_PROCESS	2.44769e+11	4.19846e+09
GO:0099537	trans-synaptic signaling	BIOLOGICAL_PROCESS	2.49774e+11	4.29484e+08
GO:0048667	cell morphogenesis involved in neuron differentiation	BIOLOGICAL_PROCESS	2.64157e+10	4.55329e+08
GO:0120031	plasma membrane bounded cell projection assembly	BIOLOGICAL_PROCESS	2.67618e+10	4.62422e+09
GO:0031346	positive regulation of cell projection organization	BIOLOGICAL_PROCESS	3.0108e+11	5.22779e+07
GO:0120035	regulation of plasma membrane bounded cell projection organization	BIOLOGICAL_PROCESS	3.28955e+11	5.72566e+08
GO:0042116	macrophage activation	BIOLOGICAL_PROCESS	3.37538e+11	5.9287e+08
GO:0051348	negative regulation of transferase activity	BIOLOGICAL_PROCESS	3.37538e+11	5.93195e+08
GO:1901724	positive regulation of cell proliferation involved in kidney development	BIOLOGICAL_PROCESS	3.37538e+11	5.9155e+08
GO:0045944	positive regulation of transcription by RNA polymerase II	BIOLOGICAL_PROCESS	3.37538e+11	5.90416e+08
GO:0043525	positive regulation of neuron apoptotic process	BIOLOGICAL_PROCESS	3.38412e+11	5.97584e+08
GO:0001944	vasculature development	BIOLOGICAL_PROCESS	3.38412e+11	5.96291e+08
GO:0072740	cellular response to anisomycin	BIOLOGICAL_PROCESS	3.45274e+10	6.11155e+08
GO:0060326	cell chemotaxis	BIOLOGICAL_PROCESS	3.46383e+10	6.14578e+08
GO:0048732	gland development	BIOLOGICAL_PROCESS	3.58647e+10	6.3785e+08
GO:0001889	liver development	BIOLOGICAL_PROCESS	3.67428e+10	6.56564e+08
GO:0031397	negative regulation of protein ubiquitination	BIOLOGICAL_PROCESS	3.69369e+10	6.61588e+08
GO:0043523	regulation of neuron apoptotic process	BIOLOGICAL_PROCESS	3.69402e+09	6.63206e+08
GO:0048659	smooth muscle cell proliferation	BIOLOGICAL_PROCESS	3.76165e+10	6.76932e+08
GO:0046907	intracellular transport	BIOLOGICAL_PROCESS	3.79045e+10	6.83713e+08
GO:1901652	response to peptide	BIOLOGICAL_PROCESS	3.8692e+10	6.99548e+08
GO:0030855	epithelial cell differentiation	BIOLOGICAL_PROCESS	3.97328e+10	7.2004e+08
GO:0007409	axonogenesis	BIOLOGICAL_PROCESS	4.11311e+10	7.47114e+08
GO:0023056	positive regulation of signaling	BIOLOGICAL_PROCESS	4.18163e+10	7.63084e+08
GO:0006892	post-Golgi vesicle-mediated transport	BIOLOGICAL_PROCESS	4.19936e+10	7.6809e+07
GO:0048678	response to axon injury	BIOLOGICAL_PROCESS	4.28172e+11	7.84958e+08
GO:0043086	negative regulation of catalytic activity	BIOLOGICAL_PROCESS	4.28462e+10	7.89102e+07
GO:0051049	regulation of transport	BIOLOGICAL_PROCESS	4.29099e+11	7.92082e+08
GO:0010975	regulation of neuron projection development	BIOLOGICAL_PROCESS	4.357e+11	8.06104e+08
GO:0030031	cell projection assembly	BIOLOGICAL_PROCESS	4.41348e+10	8.20274e+08
GO:0071504	cellular response to heparin	BIOLOGICAL_PROCESS	4.41348e+10	8.18558e+08
GO:0000902	cell morphogenesis	BIOLOGICAL_PROCESS	4.41651e+10	8.22699e+08
GO:0040017	positive regulation of locomotion	BIOLOGICAL_PROCESS	4.423e+10	8.25771e+08
GO:0031103	axon regeneration	BIOLOGICAL_PROCESS	4.42595e+09	8.28186e+08
GO:0010647	positive regulation of cell communication	BIOLOGICAL_PROCESS	4.42877e+11	8.30581e+08
GO:0031953	negative regulation of protein autophosphorylation	BIOLOGICAL_PROCESS	4.71058e+10	8.87403e+08
GO:0032869	cellular response to insulin stimulus	BIOLOGICAL_PROCESS	4.83946e+10	9.15762e+08
GO:0061008	hepaticobiliary system development	BIOLOGICAL_PROCESS	4.83946e+10	9.14895e+08
GO:0048918	posterior lateral line nerve development	BIOLOGICAL_PROCESS	5.03321e+09	9.58788e+08
GO:0046844	chorion micropyle formation	BIOLOGICAL_PROCESS	5.03321e+09	9.58788e+08
GO:0060429	epithelium development	BIOLOGICAL_PROCESS	5.07785e+10	9.69431e+08
GO:0050790	regulation of catalytic activity	BIOLOGICAL_PROCESS	5.08556e+10	9.73046e+08
GO:0044281	small molecule metabolic process	BIOLOGICAL_PROCESS	5.21556e+10	1.00012e+09
GO:0009967	positive regulation of signal transduction	BIOLOGICAL_PROCESS	5.48206e+11	1.05584e+10
GO:0031344	regulation of cell projection organization	BIOLOGICAL_PROCESS	5.58013e+10	1.07879e+09
GO:0001568	blood vessel development	BIOLOGICAL_PROCESS	5.58013e+10	1.07943e+10
GO:0048892	lateral line nerve development	BIOLOGICAL_PROCESS	5.72315e+10	1.11433e+09
GO:0071873	response to norepinephrine	BIOLOGICAL_PROCESS	5.72315e+10	1.11433e+09
GO:0071222	cellular response to lipopolysaccharide	BIOLOGICAL_PROCESS	5.84678e+09	1.14087e+09
GO:0099536	synaptic signaling	BIOLOGICAL_PROCESS	5.856e+11	1.14514e+10
GO:0048589	developmental growth	BIOLOGICAL_PROCESS	5.96053e+10	1.1706e+10
GO:0002931	response to ischemia	BIOLOGICAL_PROCESS	6.03554e+10	1.18788e+10
GO:0150076	neuroinflammatory response	BIOLOGICAL_PROCESS	6.45568e+09	1.27601e+10
GO:0072203	cell proliferation involved in metanephros development	BIOLOGICAL_PROCESS	6.54988e+10	1.29739e+10
GO:0016055	Wnt signaling pathway	BIOLOGICAL_PROCESS	7.2996e+10	1.46023e+10
GO:0042330	taxis	BIOLOGICAL_PROCESS	7.2996e+10	1.46127e+10
GO:0033762	response to glucagon	BIOLOGICAL_PROCESS	7.45734e+10	1.49599e+10
GO:0050810	regulation of steroid biosynthetic process	BIOLOGICAL_PROCESS	7.62318e+10	1.53248e+10
GO:0010817	regulation of hormone levels	BIOLOGICAL_PROCESS	7.76348e+10	1.56722e+10
GO:0061061	muscle structure development	BIOLOGICAL_PROCESS	7.85238e+10	1.58848e+10
GO:1904707	positive regulation of vascular associated smooth muscle cell proliferation	BIOLOGICAL_PROCESS	7.87068e+09	1.59881e+10
GO:0009790	embryo development	BIOLOGICAL_PROCESS	7.87068e+09	1.59703e+10
GO:0034097	response to cytokine	BIOLOGICAL_PROCESS	8.27694e+10	1.68832e+10
GO:0007416	synapse assembly	BIOLOGICAL_PROCESS	8.27694e+10	1.68612e+10
GO:0030111	regulation of Wnt signaling pathway	BIOLOGICAL_PROCESS	8.3062e+10	1.69779e+10
GO:0033673	negative regulation of kinase activity	BIOLOGICAL_PROCESS	8.70429e+10	1.78282e+10
GO:0040007	growth	BIOLOGICAL_PROCESS	8.78911e+10	1.8039e+10
GO:0042448	progesterone metabolic process	BIOLOGICAL_PROCESS	9.03979e+09	1.85916e+10
GO:0009612	response to mechanical stimulus	BIOLOGICAL_PROCESS	9.09697e+10	1.87476e+10
GO:0031102	neuron projection regeneration	BIOLOGICAL_PROCESS	9.10994e+10	1.88127e+10
GO:0060070	canonical Wnt signaling pathway	BIOLOGICAL_PROCESS	9.13035e+10	1.88933e+10
GO:0035239	tube morphogenesis	BIOLOGICAL_PROCESS	9.16085e+10	1.8995e+10
GO:0032352	positive regulation of hormone metabolic process	BIOLOGICAL_PROCESS	9.26595e+10	1.9252e+09
GO:0071219	cellular response to molecule of bacterial origin	BIOLOGICAL_PROCESS	9.73761e+10	2.0314e+09
GO:0043409	negative regulation of MAPK cascade	BIOLOGICAL_PROCESS	1.01529e+12	2.12231e+09
GO:0009057	macromolecule catabolic process	BIOLOGICAL_PROCESS	1.1313e+12	2.37912e+09
GO:0097305	response to alcohol	BIOLOGICAL_PROCESS	1.13964e+12	2.40147e+10
GO:0002042	cell migration involved in sprouting angiogenesis	BIOLOGICAL_PROCESS	1.17709e+12	2.48535e+10
GO:0090066	regulation of anatomical structure size	BIOLOGICAL_PROCESS	1.18763e+12	2.51261e+09
GO:0046885	regulation of hormone biosynthetic process	BIOLOGICAL_PROCESS	1.22031e+12	2.58688e+09
GO:0010639	negative regulation of organelle organization	BIOLOGICAL_PROCESS	1.22882e+12	2.61011e+10
GO:0007010	cytoskeleton organization	BIOLOGICAL_PROCESS	1.27615e+12	2.716e+09
GO:0050867	positive regulation of cell activation	BIOLOGICAL_PROCESS	1.27831e+12	2.72599e+10
GO:0014706	striated muscle tissue development	BIOLOGICAL_PROCESS	1.28278e+11	2.74093e+10
GO:0008284	positive regulation of cell population proliferation	BIOLOGICAL_PROCESS	1.28323e+12	2.7473e+10
GO:0051130	positive regulation of cellular component organization	BIOLOGICAL_PROCESS	1.4018e+12	3.01297e+09
GO:0000226	microtubule cytoskeleton organization	BIOLOGICAL_PROCESS	1.50594e+12	3.24315e+09
GO:0034465	response to carbon monoxide	BIOLOGICAL_PROCESS	1.54774e+12	3.33969e+10
GO:0048514	blood vessel morphogenesis	BIOLOGICAL_PROCESS	1.568e+11	3.39002e+09
GO:0061951	establishment of protein localization to plasma membrane	BIOLOGICAL_PROCESS	1.58873e+12	3.44153e+09
GO:0032835	glomerulus development	BIOLOGICAL_PROCESS	1.66841e+10	3.62118e+10
GO:0071317	cellular response to isoquinoline alkaloid	BIOLOGICAL_PROCESS	1.67187e+12	3.63572e+09
GO:0042745	circadian sleep/wake cycle	BIOLOGICAL_PROCESS	1.68142e+12	3.66358e+10
GO:0046529	imaginal disc fusion, thorax closure	BIOLOGICAL_PROCESS	1.69227e+11	3.70148e+09
GO:0046528	imaginal disc fusion	BIOLOGICAL_PROCESS	1.69227e+11	3.70148e+09
GO:0042446	hormone biosynthetic process	BIOLOGICAL_PROCESS	1.72011e+12	3.77688e+09
GO:0006886	intracellular protein transport	BIOLOGICAL_PROCESS	1.72011e+12	3.77263e+10
GO:0051338	regulation of transferase activity	BIOLOGICAL_PROCESS	1.77235e+12	3.90652e+09
GO:0048638	regulation of developmental growth	BIOLOGICAL_PROCESS	1.7813e+11	3.93376e+09
GO:0044093	positive regulation of molecular function	BIOLOGICAL_PROCESS	1.78615e+12	3.95198e+09
GO:0002683	negative regulation of immune system process	BIOLOGICAL_PROCESS	1.81406e+12	4.03669e+09
GO:0006694	steroid biosynthetic process	BIOLOGICAL_PROCESS	1.83676e+12	4.09494e+09
GO:0001933	negative regulation of protein phosphorylation	BIOLOGICAL_PROCESS	1.8379e+12	4.11297e+09
GO:0032496	response to lipopolysaccharide	BIOLOGICAL_PROCESS	1.8379e+12	4.11297e+09
GO:0006629	lipid metabolic process	BIOLOGICAL_PROCESS	1.85573e+12	4.16069e+09
GO:0031667	response to nutrient levels	BIOLOGICAL_PROCESS	1.87034e+11	4.20132e+09
GO:0034330	cell junction organization	BIOLOGICAL_PROCESS	1.87182e+12	4.21254e+08
GO:0072239	metanephric glomerulus vasculature development	BIOLOGICAL_PROCESS	1.8902e+12	4.26985e+09
GO:0045657	positive regulation of monocyte differentiation	BIOLOGICAL_PROCESS	1.89543e+11	4.28965e+09
GO:0022410	circadian sleep/wake cycle process	BIOLOGICAL_PROCESS	1.90509e+12	4.31954e+09
GO:0007464	R3/R4 cell fate commitment	BIOLOGICAL_PROCESS	1.96885e+12	4.48069e+10
GO:0044283	small molecule biosynthetic process	BIOLOGICAL_PROCESS	1.98243e+12	4.51996e+09
GO:0061029	eyelid development in camera-type eye	BIOLOGICAL_PROCESS	2.16853e+12	4.97169e+10
GO:0002921	negative regulation of humoral immune response	BIOLOGICAL_PROCESS	2.16853e+12	4.97169e+10
GO:0008285	negative regulation of cell population proliferation	BIOLOGICAL_PROCESS	2.18048e+12	5.00827e+09
GO:0001525	angiogenesis	BIOLOGICAL_PROCESS	2.18082e+11	5.02287e+09
GO:0046686	response to cadmium ion	BIOLOGICAL_PROCESS	2.18082e+11	5.02742e+10
GO:0016310	phosphorylation	BIOLOGICAL_PROCESS	2.22429e+12	5.13701e+10
GO:0002694	regulation of leukocyte activation	BIOLOGICAL_PROCESS	2.23791e+12	5.20442e+09
GO:0060828	regulation of canonical Wnt signaling pathway	BIOLOGICAL_PROCESS	2.23791e+12	5.20585e+08
GO:0080135	regulation of cellular response to stress	BIOLOGICAL_PROCESS	2.23791e+12	5.20619e+09
GO:0050776	regulation of immune response	BIOLOGICAL_PROCESS	2.35893e+12	5.50762e+09
GO:0009896	positive regulation of catabolic process	BIOLOGICAL_PROCESS	2.52412e+11	5.92265e+10
GO:0050865	regulation of cell activation	BIOLOGICAL_PROCESS	2.57628e+11	6.05851e+09
GO:0022402	cell cycle process	BIOLOGICAL_PROCESS	2.66905e+12	6.28793e+09
GO:0001779	natural killer cell differentiation	BIOLOGICAL_PROCESS	2.69996e+12	6.37212e+09
GO:0030099	myeloid cell differentiation	BIOLOGICAL_PROCESS	2.71089e+12	6.43218e+09
GO:0008340	determination of adult lifespan	BIOLOGICAL_PROCESS	2.71089e+12	6.41748e+10
GO:1902473	regulation of protein localization to synapse	BIOLOGICAL_PROCESS	2.72141e+12	6.46861e+09
GO:0019218	regulation of steroid metabolic process	BIOLOGICAL_PROCESS	2.75014e+12	6.54849e+10
GO:0038127	ERBB signaling pathway	BIOLOGICAL_PROCESS	2.81023e+12	6.70344e+09
GO:0072124	regulation of glomerular mesangial cell proliferation	BIOLOGICAL_PROCESS	2.82849e+11	6.78276e+08
GO:0071455	cellular response to hyperoxia	BIOLOGICAL_PROCESS	2.82849e+11	6.78276e+08
GO:0006468	protein phosphorylation	BIOLOGICAL_PROCESS	2.88006e+12	6.91856e+09
GO:0007026	negative regulation of microtubule depolymerization	BIOLOGICAL_PROCESS	2.90031e+10	7.00387e+09
GO:0060537	muscle tissue development	BIOLOGICAL_PROCESS	2.96074e+12	7.16229e+08
GO:0043087	regulation of GTPase activity	BIOLOGICAL_PROCESS	3.00684e+11	7.28647e+09
GO:0002040	sprouting angiogenesis	BIOLOGICAL_PROCESS	3.08025e+12	7.49032e+09
GO:0002696	positive regulation of leukocyte activation	BIOLOGICAL_PROCESS	3.1225e+12	7.61938e+09
GO:0035264	multicellular organism growth	BIOLOGICAL_PROCESS	3.1225e+12	7.61938e+09
GO:0001503	ossification	BIOLOGICAL_PROCESS	3.14185e+12	7.67984e+08
GO:1903321	negative regulation of protein modification by small protein conjugation or removal	BIOLOGICAL_PROCESS	3.31026e+11	8.1194e+09
GO:0033365	protein localization to organelle	BIOLOGICAL_PROCESS	3.3677e+11	8.28868e+09
GO:0007017	microtubule-based process	BIOLOGICAL_PROCESS	3.37254e+11	8.3148e+09
GO:0048193	Golgi vesicle transport	BIOLOGICAL_PROCESS	3.38024e+11	8.34802e+09
GO:0030522	intracellular receptor signaling pathway	BIOLOGICAL_PROCESS	3.4055e+10	8.42477e+07
GO:0001774	microglial cell activation	BIOLOGICAL_PROCESS	3.40708e+11	8.44304e+09
GO:0071453	cellular response to oxygen levels	BIOLOGICAL_PROCESS	3.41958e+11	8.50284e+09
GO:0010498	proteasomal protein catabolic process	BIOLOGICAL_PROCESS	3.41958e+11	8.49237e+09
GO:0043392	negative regulation of DNA binding	BIOLOGICAL_PROCESS	3.48208e+11	8.67291e+09
GO:0043001	Golgi to plasma membrane protein transport	BIOLOGICAL_PROCESS	3.55854e+11	8.87836e+09
GO:0043534	blood vessel endothelial cell migration	BIOLOGICAL_PROCESS	3.62102e+12	9.06477e+09
GO:1904705	regulation of vascular associated smooth muscle cell proliferation	BIOLOGICAL_PROCESS	3.88983e+12	9.75408e+08
GO:0060136	embryonic process involved in female pregnancy	BIOLOGICAL_PROCESS	4.13994e+12	1.04161e+11
GO:0072110	glomerular mesangial cell proliferation	BIOLOGICAL_PROCESS	4.13994e+12	1.04161e+11
GO:0035026	leading edge cell differentiation	BIOLOGICAL_PROCESS	4.17934e+11	1.05329e+11
GO:0030178	negative regulation of Wnt signaling pathway	BIOLOGICAL_PROCESS	4.30617e+11	1.08888e+09
GO:0038093	Fc receptor signaling pathway	BIOLOGICAL_PROCESS	4.30708e+11	1.09093e+11
GO:0050808	synapse organization	BIOLOGICAL_PROCESS	4.32085e+11	1.09624e+11
GO:0071276	cellular response to cadmium ion	BIOLOGICAL_PROCESS	4.32627e+11	1.09944e+10
GO:0043549	regulation of kinase activity	BIOLOGICAL_PROCESS	4.37748e+11	1.11429e+11
GO:0035330	regulation of hippo signaling	BIOLOGICAL_PROCESS	4.38634e+12	1.1184e+11
GO:0001822	kidney development	BIOLOGICAL_PROCESS	4.40488e+11	1.12498e+11
GO:0071901	negative regulation of protein serine/threonine kinase activity	BIOLOGICAL_PROCESS	4.40528e+12	1.12694e+11
GO:1901874	negative regulation of post-translational protein modification	BIOLOGICAL_PROCESS	4.5678e+11	1.17044e+11
GO:0002274	myeloid leukocyte activation	BIOLOGICAL_PROCESS	4.56938e+11	1.17277e+11
GO:0000278	mitotic cell cycle	BIOLOGICAL_PROCESS	4.5699e+12	1.17483e+11
GO:0007163	establishment or maintenance of cell polarity	BIOLOGICAL_PROCESS	4.59362e+12	1.18286e+11
GO:0071216	cellular response to biotic stimulus	BIOLOGICAL_PROCESS	4.66273e+12	1.20263e+11
GO:0043242	negative regulation of protein-containing complex disassembly	BIOLOGICAL_PROCESS	4.70026e+12	1.21429e+11
GO:0042110	T cell activation	BIOLOGICAL_PROCESS	4.73443e+11	1.2291e+11
GO:0021700	developmental maturation	BIOLOGICAL_PROCESS	4.73443e+11	1.22881e+10
GO:0051093	negative regulation of developmental process	BIOLOGICAL_PROCESS	4.80568e+12	1.24962e+11
GO:0007276	gamete generation	BIOLOGICAL_PROCESS	4.89095e+11	1.27386e+11
GO:0071503	response to heparin	BIOLOGICAL_PROCESS	4.89232e+11	1.27627e+11
GO:0046777	protein autophosphorylation	BIOLOGICAL_PROCESS	4.91777e+11	1.28499e+11
GO:0043933	protein-containing complex organization	BIOLOGICAL_PROCESS	5.1163e+11	1.33902e+11
GO:1990874	vascular associated smooth muscle cell proliferation	BIOLOGICAL_PROCESS	5.53013e+11	1.45431e+11
GO:0032350	regulation of hormone metabolic process	BIOLOGICAL_PROCESS	5.53837e+11	1.45882e+10
GO:0006935	chemotaxis	BIOLOGICAL_PROCESS	5.57689e+10	1.47131e+11
GO:0071347	cellular response to interleukin-1	BIOLOGICAL_PROCESS	5.59404e+11	1.4782e+11
GO:0002269	leukocyte activation involved in inflammatory response	BIOLOGICAL_PROCESS	5.70695e+11	1.51284e+11
GO:0021604	cranial nerve structural organization	BIOLOGICAL_PROCESS	5.70695e+11	1.51284e+11
GO:0035994	response to muscle stretch	BIOLOGICAL_PROCESS	5.72813e+10	1.52329e+11
GO:0072111	cell proliferation involved in kidney development	BIOLOGICAL_PROCESS	5.75237e+11	1.53458e+11
GO:0032369	negative regulation of lipid transport	BIOLOGICAL_PROCESS	5.75237e+11	1.53458e+11
GO:0014075	response to amine	BIOLOGICAL_PROCESS	5.7548e+11	1.53765e+10
GO:0097190	apoptotic signaling pathway	BIOLOGICAL_PROCESS	5.88131e+11	1.57393e+11
GO:0050679	positive regulation of epithelial cell proliferation	BIOLOGICAL_PROCESS	5.91696e+10	1.58597e+10
GO:0051603	proteolysis involved in protein catabolic process	BIOLOGICAL_PROCESS	6.01587e+11	1.61755e+10
GO:1905953	negative regulation of lipid localization	BIOLOGICAL_PROCESS	6.11511e+11	1.64939e+11
GO:0033144	negative regulation of intracellular steroid hormone receptor signaling pathway	BIOLOGICAL_PROCESS	6.11511e+11	1.64939e+11
GO:0009785	blue light signaling pathway	BIOLOGICAL_PROCESS	6.68758e+11	1.81225e+11
GO:0071483	cellular response to blue light	BIOLOGICAL_PROCESS	6.68758e+11	1.81225e+11
GO:0021612	facial nerve structural organization	BIOLOGICAL_PROCESS	6.91778e+11	1.87755e+11
GO:0048167	regulation of synaptic plasticity	BIOLOGICAL_PROCESS	7.01365e+11	1.90653e+10
GO:0022412	cellular process involved in reproduction in multicellular organism	BIOLOGICAL_PROCESS	7.07707e+11	1.92675e+11
GO:0008610	lipid biosynthetic process	BIOLOGICAL_PROCESS	7.13933e+11	1.94671e+11
GO:0010634	positive regulation of epithelial cell migration	BIOLOGICAL_PROCESS	7.29212e+10	1.99144e+11
GO:0021593	rhombomere morphogenesis	BIOLOGICAL_PROCESS	7.36605e+11	2.01474e+11
GO:0007264	small GTPase-mediated signal transduction	BIOLOGICAL_PROCESS	7.52467e+11	2.06129e+11
GO:0007019	microtubule depolymerization	BIOLOGICAL_PROCESS	7.69683e+11	2.11494e+10
GO:0031114	regulation of microtubule depolymerization	BIOLOGICAL_PROCESS	7.84225e+10	2.1582e+10
GO:0030902	hindbrain development	BIOLOGICAL_PROCESS	7.88423e+11	2.17308e+11
GO:0030155	regulation of cell adhesion	BIOLOGICAL_PROCESS	7.903e+11	2.18159e+10
GO:0051241	negative regulation of multicellular organismal process	BIOLOGICAL_PROCESS	7.94615e+11	2.19685e+11
GO:0035295	tube development	BIOLOGICAL_PROCESS	7.95093e+11	2.20152e+10
GO:0030163	protein catabolic process	BIOLOGICAL_PROCESS	8.04779e+11	2.23173e+11
GO:0006979	response to oxidative stress	BIOLOGICAL_PROCESS	8.06967e+11	2.2412e+11
GO:0043032	positive regulation of macrophage activation	BIOLOGICAL_PROCESS	8.11084e+11	2.25605e+11
GO:2000849	regulation of glucocorticoid secretion	BIOLOGICAL_PROCESS	8.11835e+11	2.26498e+10
GO:0003006	developmental process involved in reproduction	BIOLOGICAL_PROCESS	8.13704e+11	2.27363e+11
GO:0034329	cell junction assembly	BIOLOGICAL_PROCESS	8.17894e+11	2.28878e+11
GO:0002431	Fc receptor mediated stimulatory signaling pathway	BIOLOGICAL_PROCESS	8.32384e+11	2.33634e+11
GO:0045639	positive regulation of myeloid cell differentiation	BIOLOGICAL_PROCESS	8.32983e+10	2.34154e+11
GO:0044087	regulation of cellular component biogenesis	BIOLOGICAL_PROCESS	8.38964e+11	2.36189e+11
GO:0009611	response to wounding	BIOLOGICAL_PROCESS	8.48052e+10	2.40177e+11
GO:0045580	regulation of T cell differentiation	BIOLOGICAL_PROCESS	8.48341e+11	2.40616e+11
GO:0033013	tetrapyrrole metabolic process	BIOLOGICAL_PROCESS	8.72106e+11	2.48091e+10
GO:0051962	positive regulation of nervous system development	BIOLOGICAL_PROCESS	8.96366e+11	2.55748e+11
GO:0042325	regulation of phosphorylation	BIOLOGICAL_PROCESS	9.09021e+11	2.59742e+10
GO:1903320	regulation of protein modification by small protein conjugation or removal	BIOLOGICAL_PROCESS	9.14974e+11	2.61829e+11
GO:0019915	lipid storage	BIOLOGICAL_PROCESS	9.37931e+11	2.69979e+10
GO:0048056	R3/R4 cell differentiation	BIOLOGICAL_PROCESS	9.37931e+11	2.69326e+11
GO:0170062	nutrient storage	BIOLOGICAL_PROCESS	9.37931e+11	2.69979e+10
GO:0000271	polysaccharide biosynthetic process	BIOLOGICAL_PROCESS	9.37931e+11	2.69e+10
GO:0048871	multicellular organismal-level homeostasis	BIOLOGICAL_PROCESS	9.87511e+11	2.84667e+11
GO:0061058	regulation of peptidoglycan recognition protein signaling pathway	BIOLOGICAL_PROCESS	9.87725e+11	2.85561e+11
GO:0061469	regulation of type B pancreatic cell proliferation	BIOLOGICAL_PROCESS	9.87725e+11	2.85561e+11
GO:0010631	epithelial cell migration	BIOLOGICAL_PROCESS	1007999205236539	2.91847e+10
GO:0009887	animal organ morphogenesis	BIOLOGICAL_PROCESS	1.04211e+16	3.02162e+11
GO:0002237	response to molecule of bacterial origin	BIOLOGICAL_PROCESS	1.05129e+16	3.06152e+10
GO:0009792	embryo development ending in birth or egg hatching	BIOLOGICAL_PROCESS	1.05129e+16	3.05841e+11
GO:0035329	hippo signaling	BIOLOGICAL_PROCESS	1063007161493673	3.10014e+10
GO:0046036	CTP metabolic process	BIOLOGICAL_PROCESS	1.07399e+16	3.1367e+11
GO:1901722	regulation of cell proliferation involved in kidney development	BIOLOGICAL_PROCESS	1094940966582173	3.2025e+10
GO:0140546	defense response to symbiont	BIOLOGICAL_PROCESS	1.09703e+16	3.21323e+10
GO:1901873	regulation of post-translational protein modification	BIOLOGICAL_PROCESS	1108165826462484	3.25052e+10
GO:0120178	steroid hormone biosynthetic process	BIOLOGICAL_PROCESS	1.12812e+16	3.31857e+11
GO:0072311	glomerular epithelial cell differentiation	BIOLOGICAL_PROCESS	1.12812e+16	3.31857e+11
GO:0001932	regulation of protein phosphorylation	BIOLOGICAL_PROCESS	1.13591e+16	3.34627e+11
GO:0006913	nucleocytoplasmic transport	BIOLOGICAL_PROCESS	1141736737483228	3.36824e+10
GO:0051174	regulation of phosphorus metabolic process	BIOLOGICAL_PROCESS	1.14559e+16	3.39408e+10
GO:0051054	positive regulation of DNA metabolic process	BIOLOGICAL_PROCESS	1.14559e+16	3.38554e+10
GO:0019220	regulation of phosphate metabolic process	BIOLOGICAL_PROCESS	1.14559e+16	3.39408e+10
GO:0022603	regulation of anatomical structure morphogenesis	BIOLOGICAL_PROCESS	1155422316275939	3.42809e+10
GO:0070507	regulation of microtubule cytoskeleton organization	BIOLOGICAL_PROCESS	1.16652e+16	3.46593e+10
GO:0006893	Golgi to plasma membrane transport	BIOLOGICAL_PROCESS	1.17769e+16	3.50843e+11
GO:0010608	post-transcriptional regulation of gene expression	BIOLOGICAL_PROCESS	1.19046e+16	3.55211e+10
GO:0090132	epithelium migration	BIOLOGICAL_PROCESS	1.21291e+16	3.62422e+10
GO:0007173	epidermal growth factor receptor signaling pathway	BIOLOGICAL_PROCESS	1.24223e+16	3.71707e+11
GO:0009607	response to biotic stimulus	BIOLOGICAL_PROCESS	1.29514e+16	3.88084e+10
GO:1990778	protein localization to cell periphery	BIOLOGICAL_PROCESS	1.29702e+16	3.89193e+10
GO:0009894	regulation of catabolic process	BIOLOGICAL_PROCESS	1.30581e+16	3.92383e+10
GO:0051051	negative regulation of transport	BIOLOGICAL_PROCESS	1.32229e+16	3.9789e+10
GO:0001836	release of cytochrome c from mitochondria	BIOLOGICAL_PROCESS	1.34636e+16	4.05997e+10
GO:0021610	facial nerve morphogenesis	BIOLOGICAL_PROCESS	1.34636e+16	4.06268e+09
GO:0038066	p38MAPK cascade	BIOLOGICAL_PROCESS	1.39312e+16	4.20965e+11
GO:0035743	CD4-positive, alpha-beta T cell cytokine production	BIOLOGICAL_PROCESS	1.45421e+16	4.40652e+10
GO:0044849	estrous cycle	BIOLOGICAL_PROCESS	1.45769e+16	4.4232e+10
GO:0043922	host-mediated suppression of viral transcription	BIOLOGICAL_PROCESS	1.46552e+16	4.45314e+10
GO:0006700	C21-steroid hormone biosynthetic process	BIOLOGICAL_PROCESS	1.47945e+16	4.5017e+11
GO:0002764	immune response-regulating signaling pathway	BIOLOGICAL_PROCESS	1.5135e+16	4.61168e+10
GO:0002757	immune response-activating signaling pathway	BIOLOGICAL_PROCESS	1514541344532439	4.62124e+11
GO:0072010	glomerular epithelium development	BIOLOGICAL_PROCESS	1592538452210827	4.89279e+10
GO:0001659	temperature homeostasis	BIOLOGICAL_PROCESS	1592538452210827	4.88782e+11
GO:0002763	positive regulation of myeloid leukocyte differentiation	BIOLOGICAL_PROCESS	1.6218e+16	4.98952e+10
GO:0099118	microtubule-based protein transport	BIOLOGICAL_PROCESS	1.62776e+16	5.02159e+11
GO:0098840	protein transport along microtubule	BIOLOGICAL_PROCESS	1.62776e+16	5.02159e+11
GO:0043244	regulation of protein-containing complex disassembly	BIOLOGICAL_PROCESS	1.637e+16	5.05699e+10
GO:0051169	nuclear transport	BIOLOGICAL_PROCESS	1.68279e+16	5.21263e+10
GO:0021561	facial nerve development	BIOLOGICAL_PROCESS	1.69747e+16	5.26525e+10
GO:0045187	regulation of circadian sleep/wake cycle, sleep	BIOLOGICAL_PROCESS	1.69841e+16	5.27531e+11
GO:1902414	protein localization to cell junction	BIOLOGICAL_PROCESS	1.71174e+16	5.32393e+10
GO:0001738	morphogenesis of a polarized epithelium	BIOLOGICAL_PROCESS	1723410703110786	5.3675e+11
GO:0043542	endothelial cell migration	BIOLOGICAL_PROCESS	1.73105e+16	5.39857e+11
GO:0006952	defense response	BIOLOGICAL_PROCESS	1772305749915737	5.53472e+10
GO:0016051	carbohydrate biosynthetic process	BIOLOGICAL_PROCESS	1.78201e+16	5.57255e+11
GO:0090090	negative regulation of canonical Wnt signaling pathway	BIOLOGICAL_PROCESS	1.79628e+16	5.62996e+11
GO:0032762	mast cell cytokine production	BIOLOGICAL_PROCESS	1.79628e+16	5.67333e+11
GO:0032763	regulation of mast cell cytokine production	BIOLOGICAL_PROCESS	1.79628e+16	5.67333e+11
GO:0048145	regulation of fibroblast proliferation	BIOLOGICAL_PROCESS	1.79628e+16	5.69288e+10
GO:0001736	establishment of planar polarity	BIOLOGICAL_PROCESS	1.79628e+16	5.69288e+10
GO:0097167	circadian regulation of translation	BIOLOGICAL_PROCESS	1.79628e+16	5.67333e+11
GO:0071236	cellular response to antibiotic	BIOLOGICAL_PROCESS	1.79628e+16	5.68161e+10
GO:0072310	glomerular epithelial cell development	BIOLOGICAL_PROCESS	1.79628e+16	5.68161e+10
GO:0008207	C21-steroid hormone metabolic process	BIOLOGICAL_PROCESS	1.79628e+16	5.68341e+11
GO:0043030	regulation of macrophage activation	BIOLOGICAL_PROCESS	1.79628e+16	5.68542e+10
GO:0032886	regulation of microtubule-based process	BIOLOGICAL_PROCESS	1.80294e+16	5.72157e+10
GO:1901699	cellular response to nitrogen compound	BIOLOGICAL_PROCESS	1814614688983741	5.76627e+11
GO:0072001	renal system development	BIOLOGICAL_PROCESS	1.82764e+16	5.81535e+10
GO:0016358	dendrite development	BIOLOGICAL_PROCESS	1.88489e+16	6.00545e+11
GO:0006778	porphyrin-containing compound metabolic process	BIOLOGICAL_PROCESS	1.91783e+16	6.11851e+10
GO:0006417	regulation of translation	BIOLOGICAL_PROCESS	1.94499e+16	6.21336e+09
GO:0061900	glial cell activation	BIOLOGICAL_PROCESS	1.94723e+16	6.22872e+10
GO:0098542	defense response to other organism	BIOLOGICAL_PROCESS	1.97101e+16	6.31307e+10
GO:0060840	artery development	BIOLOGICAL_PROCESS	1.98552e+16	6.36791e+10
GO:0043405	regulation of MAP kinase activity	BIOLOGICAL_PROCESS	2.02932e+16	6.51696e+10
GO:0035767	endothelial cell chemotaxis	BIOLOGICAL_PROCESS	2.04423e+16	6.58206e+10
GO:0007164	establishment of tissue polarity	BIOLOGICAL_PROCESS	2.05435e+16	6.6233e+10
GO:0051493	regulation of cytoskeleton organization	BIOLOGICAL_PROCESS	2.05716e+16	6.64103e+10
GO:0072109	glomerular mesangium development	BIOLOGICAL_PROCESS	2.08831e+16	6.75039e+10
GO:1990090	cellular response to nerve growth factor stimulus	BIOLOGICAL_PROCESS	2.09614e+16	6.78455e+10
GO:1900744	regulation of p38MAPK cascade	BIOLOGICAL_PROCESS	2.15277e+16	6.98598e+08
GO:0042753	positive regulation of circadian rhythm	BIOLOGICAL_PROCESS	2.22967e+16	7.24494e+10
GO:1902533	positive regulation of intracellular signal transduction	BIOLOGICAL_PROCESS	2.25911e+16	7.3501e+10
GO:0001975	response to amphetamine	BIOLOGICAL_PROCESS	2.28035e+16	7.42882e+10
GO:0030431	sleep	BIOLOGICAL_PROCESS	2283480178485718	7.45155e+10
GO:0070670	response to interleukin-4	BIOLOGICAL_PROCESS	2283480178485718	7.45827e+09
GO:0007169	cell surface receptor protein tyrosine kinase signaling pathway	BIOLOGICAL_PROCESS	2.31138e+16	7.56886e+10
GO:0019953	sexual reproduction	BIOLOGICAL_PROCESS	2.31272e+16	7.583e+10
GO:0043085	positive regulation of catalytic activity	BIOLOGICAL_PROCESS	2418029209991748	7.95887e+10
GO:0044057	regulation of system process	BIOLOGICAL_PROCESS	2423219819359001	7.98617e+10
GO:0048646	anatomical structure formation involved in morphogenesis	BIOLOGICAL_PROCESS	2.43961e+16	8.06073e+10
GO:0070482	response to oxygen levels	BIOLOGICAL_PROCESS	2.43961e+16	8.05052e+10
GO:0032765	positive regulation of mast cell cytokine production	BIOLOGICAL_PROCESS	2.44054e+16	8.08438e+09
GO:0061059	positive regulation of peptidoglycan recognition protein signaling pathway	BIOLOGICAL_PROCESS	2.44054e+16	8.08438e+09
GO:0042067	establishment of ommatidial planar polarity	BIOLOGICAL_PROCESS	2447946127124277	8.14655e+10
GO:0060674	placenta blood vessel development	BIOLOGICAL_PROCESS	2447946127124277	8.15907e+09
GO:0031111	negative regulation of microtubule polymerization or depolymerization	BIOLOGICAL_PROCESS	2447946127124277	8.13971e+10
GO:0080134	regulation of response to stress	BIOLOGICAL_PROCESS	2447946127124277	8.16051e+10
GO:0017004	cytochrome complex assembly	BIOLOGICAL_PROCESS	2447946127124277	8.15876e+10
GO:0035904	aorta development	BIOLOGICAL_PROCESS	2449437180868202	8.1758e+10
GO:0007507	heart development	BIOLOGICAL_PROCESS	2.45171e+16	8.19373e+10
GO:0014037	Schwann cell differentiation	BIOLOGICAL_PROCESS	2.50198e+16	8.37227e+10
GO:0072112	podocyte differentiation	BIOLOGICAL_PROCESS	2526857697727319	8.47682e+10
GO:0048146	positive regulation of fibroblast proliferation	BIOLOGICAL_PROCESS	2527557709512494	8.48982e+10
GO:0008637	apoptotic mitochondrial changes	BIOLOGICAL_PROCESS	2548638797445112	8.57137e+09
GO:0007155	cell adhesion	BIOLOGICAL_PROCESS	2549282223074523	8.58737e+10
GO:0009408	response to heat	BIOLOGICAL_PROCESS	2549282223074523	8.59502e+10
GO:0050769	positive regulation of neurogenesis	BIOLOGICAL_PROCESS	2.58944e+16	8.76315e+09
GO:0042063	gliogenesis	BIOLOGICAL_PROCESS	2752306903818301	9.36072e+08
GO:0034260	negative regulation of GTPase activity	BIOLOGICAL_PROCESS	2840846459150986	9.68579e+10
GO:0060716	labyrinthine layer blood vessel development	BIOLOGICAL_PROCESS	2840846459150986	9.68579e+10
GO:0060291	long-term synaptic potentiation	BIOLOGICAL_PROCESS	2.9179e+16	9.9735e+10
GO:0048532	anatomical structure arrangement	BIOLOGICAL_PROCESS	2.99623e+16	1.02661e+12
GO:0045927	positive regulation of growth	BIOLOGICAL_PROCESS	3046964478427539	1.04528e+12
GO:0022900	electron transport chain	BIOLOGICAL_PROCESS	3.0791e+16	1.0576e+11
GO:0050778	positive regulation of immune response	BIOLOGICAL_PROCESS	3.13292e+16	1.07872e+12
GO:0036295	cellular response to increased oxygen levels	BIOLOGICAL_PROCESS	3.13292e+16	1.07856e+12
GO:0042542	response to hydrogen peroxide	BIOLOGICAL_PROCESS	315106733571762	1.08763e+12
GO:0043408	regulation of MAPK cascade	BIOLOGICAL_PROCESS	3216519092376024	1.11293e+12
GO:1990089	response to nerve growth factor	BIOLOGICAL_PROCESS	3.23991e+16	1.12239e+12
GO:0002759	regulation of antimicrobial humoral response	BIOLOGICAL_PROCESS	3257652849045433	1.13128e+12
GO:0071372	cellular response to follicle-stimulating hormone stimulus	BIOLOGICAL_PROCESS	3257652849045433	1.13128e+12
GO:0005978	glycogen biosynthetic process	BIOLOGICAL_PROCESS	3.30313e+16	1.14847e+12
GO:1901880	negative regulation of protein depolymerization	BIOLOGICAL_PROCESS	3.33051e+16	1.16079e+12
GO:0038097	positive regulation of mast cell activation by Fc-epsilon receptor signaling pathway	BIOLOGICAL_PROCESS	3345329580942081	1.17442e+12
GO:0120276	regulation of cerebral blood circulation	BIOLOGICAL_PROCESS	3345329580942081	1.17442e+12
GO:0120277	positive regulation of cerebral blood circulation	BIOLOGICAL_PROCESS	3345329580942081	1.17442e+12
GO:0120275	cerebral blood circulation	BIOLOGICAL_PROCESS	3345329580942081	1.17442e+12
GO:0014860	neurotransmitter secretion involved in regulation of skeletal muscle contraction	BIOLOGICAL_PROCESS	3345329580942081	1.17442e+12
GO:0030336	negative regulation of cell migration	BIOLOGICAL_PROCESS	3359869065352804	1.1821e+12
GO:0009208	pyrimidine ribonucleoside triphosphate metabolic process	BIOLOGICAL_PROCESS	3439822704643639	1.21339e+11
GO:0014911	positive regulation of smooth muscle cell migration	BIOLOGICAL_PROCESS	3.45338e+16	1.21963e+12
GO:0042754	negative regulation of circadian rhythm	BIOLOGICAL_PROCESS	3.48637e+16	1.23356e+11
GO:0048144	fibroblast proliferation	BIOLOGICAL_PROCESS	3.48637e+16	1.23863e+12
GO:0050802	circadian sleep/wake cycle, sleep	BIOLOGICAL_PROCESS	3.48637e+16	1.23547e+12
GO:0001578	microtubule bundle formation	BIOLOGICAL_PROCESS	3.48637e+16	1.23863e+12
GO:1902904	negative regulation of supramolecular fiber organization	BIOLOGICAL_PROCESS	3.48637e+16	1.2362e+12
GO:0002028	regulation of sodium ion transport	BIOLOGICAL_PROCESS	348696042297655	1.2403e+11
GO:0090130	tissue migration	BIOLOGICAL_PROCESS	3.48847e+16	1.2442e+12
GO:0035331	negative regulation of hippo signaling	BIOLOGICAL_PROCESS	3.48847e+16	1.24525e+11
GO:0021546	rhombomere development	BIOLOGICAL_PROCESS	3.48847e+16	1.24332e+11
GO:0034599	cellular response to oxidative stress	BIOLOGICAL_PROCESS	3579972219940833	1.27942e+11
GO:0021575	hindbrain morphogenesis	BIOLOGICAL_PROCESS	3580227703298903	1.28102e+12
GO:0031669	cellular response to nutrient levels	BIOLOGICAL_PROCESS	3.59202e+16	1.28676e+11
GO:0051385	response to mineralocorticoid	BIOLOGICAL_PROCESS	3.59733e+16	1.29018e+12
GO:0033043	regulation of organelle organization	BIOLOGICAL_PROCESS	3.59842e+16	1.29208e+12
GO:0040014	regulation of multicellular organism growth	BIOLOGICAL_PROCESS	3.60446e+16	1.29586e+10
GO:0009636	response to toxic substance	BIOLOGICAL_PROCESS	3607240268056925	1.29981e+12
GO:0046903	secretion	BIOLOGICAL_PROCESS	3626748003488254	1.30837e+12
GO:0009250	glucan biosynthetic process	BIOLOGICAL_PROCESS	3634721884204445	1.31278e+12
GO:0002768	immune response-regulating cell surface receptor signaling pathway	BIOLOGICAL_PROCESS	3.66054e+16	1.3249e+12
GO:0002064	epithelial cell development	BIOLOGICAL_PROCESS	3.67916e+16	1.33348e+12
GO:0035933	glucocorticoid secretion	BIOLOGICAL_PROCESS	3690314719312458	1.33908e+11
GO:0071277	cellular response to calcium ion	BIOLOGICAL_PROCESS	3.86129e+16	1.40437e+12
GO:0007528	neuromuscular junction development	BIOLOGICAL_PROCESS	3871859744033946	1.40985e+12
GO:0051494	negative regulation of cytoskeleton organization	BIOLOGICAL_PROCESS	3901491108862797	1.42228e+11
GO:0043009	chordate embryonic development	BIOLOGICAL_PROCESS	3915963499284239	1.43001e+12
GO:0045637	regulation of myeloid cell differentiation	BIOLOGICAL_PROCESS	3915963499284239	1.43086e+12
GO:0051091	positive regulation of DNA-binding transcription factor activity	BIOLOGICAL_PROCESS	3985732597018563	1.45803e+12
GO:0035283	central nervous system segmentation	BIOLOGICAL_PROCESS	4.07366e+16	1.49446e+12
GO:0035284	brain segmentation	BIOLOGICAL_PROCESS	4.07366e+16	1.49446e+12
GO:0072015	podocyte development	BIOLOGICAL_PROCESS	4.07366e+16	1.49535e+11
GO:0034614	cellular response to reactive oxygen species	BIOLOGICAL_PROCESS	416857037224562	1.5337e+12
GO:1903047	mitotic cell cycle process	BIOLOGICAL_PROCESS	4221115115007656	1.55481e+12
GO:0007030	Golgi organization	BIOLOGICAL_PROCESS	4222797803351663	1.55721e+12
GO:1903829	positive regulation of protein localization	BIOLOGICAL_PROCESS	4239484424863599	1.56515e+12
GO:0051124	synaptic assembly at neuromuscular junction	BIOLOGICAL_PROCESS	4.30032e+16	1.58942e+11
GO:0141193	nuclear receptor-mediated signaling pathway	BIOLOGICAL_PROCESS	4303785550374136	1.59252e+12
GO:0008089	anterograde axonal transport	BIOLOGICAL_PROCESS	4314761896605078	1.5984e+12
GO:0032940	secretion by cell	BIOLOGICAL_PROCESS	4327047032750683	1.60477e+11
GO:0051707	response to other organism	BIOLOGICAL_PROCESS	4344407099988563	1.61304e+12
GO:0045859	regulation of protein kinase activity	BIOLOGICAL_PROCESS	4.37534e+16	1.62821e+12
GO:0043207	response to external biotic stimulus	BIOLOGICAL_PROCESS	4.37534e+16	1.62736e+12
GO:0060341	regulation of cellular localization	BIOLOGICAL_PROCESS	4484763317845899	1.67082e+12
GO:0071345	cellular response to cytokine stimulus	BIOLOGICAL_PROCESS	4505648838077667	1.6805e+12
GO:0035418	protein localization to synapse	BIOLOGICAL_PROCESS	4527469973196304	1.69055e+12
GO:0044703	multi-organism reproductive process	BIOLOGICAL_PROCESS	45385415202973	1.6966e+12
GO:0045619	regulation of lymphocyte differentiation	BIOLOGICAL_PROCESS	4584670510889847	1.71577e+10
GO:0140352	export from cell	BIOLOGICAL_PROCESS	4601228727350003	1.72391e+12
GO:0071214	cellular response to abiotic stimulus	BIOLOGICAL_PROCESS	4604214431639518	1.72891e+12
GO:0104004	cellular response to environmental stimulus	BIOLOGICAL_PROCESS	4604214431639518	1.72891e+12
GO:0043407	negative regulation of MAP kinase activity	BIOLOGICAL_PROCESS	4664802112565298	1.75363e+11
GO:0032663	regulation of interleukin-2 production	BIOLOGICAL_PROCESS	4684606669331848	1.76502e+12
GO:0032623	interleukin-2 production	BIOLOGICAL_PROCESS	4684606669331848	1.76502e+12
GO:0048878	chemical homeostasis	BIOLOGICAL_PROCESS	4716395088897425	1.78097e+12
GO:0033143	regulation of intracellular steroid hormone receptor signaling pathway	BIOLOGICAL_PROCESS	4716395088897425	1.77988e+12
GO:0071353	cellular response to interleukin-4	BIOLOGICAL_PROCESS	4728328289818474	1.78862e+12
GO:0072657	protein localization to membrane	BIOLOGICAL_PROCESS	475784804668764	1.80264e+10
GO:0044793	host-mediated suppression of viral proces	BIOLOGICAL_PROCESS	4766830488997237	1.81006e+12
GO:0070555	response to interleukin-1	BIOLOGICAL_PROCESS	4833801188419508	1.83753e+12
GO:0050804	modulation of chemical synaptic transmission	BIOLOGICAL_PROCESS	490003800973338	1.86477e+12
GO:0099177	regulation of trans-synaptic signaling	BIOLOGICAL_PROCESS	4927395957902344	1.87726e+11
GO:0002366	leukocyte activation involved in immune response	BIOLOGICAL_PROCESS	5021730837405301	1.91532e+12
GO:0002429	immune response-activating cell surface receptor signaling pathway	BIOLOGICAL_PROCESS	503464734577453	1.92237e+12
GO:0000281	mitotic cytokinesis	BIOLOGICAL_PROCESS	5288894592859519	2.02743e+11
GO:0061318	renal filtration cell differentiation	BIOLOGICAL_PROCESS	5288894592859519	2.02886e+12
GO:0007005	mitochondrion organization	BIOLOGICAL_PROCESS	5298725515024515	2.0366e+12
GO:0010632	regulation of epithelial cell migration	BIOLOGICAL_PROCESS	5311823598188729	2.04387e+12
GO:0006469	negative regulation of protein kinase activity	BIOLOGICAL_PROCESS	5422888588007661	2.08889e+12
GO:0006259	DNA metabolic process	BIOLOGICAL_PROCESS	543075896841536	2.09421e+12
GO:0046364	monosaccharide biosynthetic process	BIOLOGICAL_PROCESS	5.49353e+16	2.12073e+11
GO:0050773	regulation of dendrite development	BIOLOGICAL_PROCESS	5.51671e+16	2.13433e+12
GO:0009267	cellular response to starvation	BIOLOGICAL_PROCESS	5.51671e+16	2.13433e+12
GO:1990535	neuron projection maintenance	BIOLOGICAL_PROCESS	5546084663827819	2.14803e+11
GO:0031952	regulation of protein autophosphorylation	BIOLOGICAL_PROCESS	5639031489304069	2.18641e+12
GO:0032101	regulation of response to external stimulus	BIOLOGICAL_PROCESS	5648325897468189	2.19239e+12
GO:0000910	cytokinesis	BIOLOGICAL_PROCESS	5658486238480769	2.19872e+12
GO:0002263	cell activation involved in immune response	BIOLOGICAL_PROCESS	5777670003848207	2.24747e+12
GO:0043524	negative regulation of neuron apoptotic process	BIOLOGICAL_PROCESS	5875227620383682	2.28789e+11
GO:0003053	circadian regulation of heart rate	BIOLOGICAL_PROCESS	5909072946664465	2.30854e+12
GO:0045041	protein import into mitochondrial intermembrane space	BIOLOGICAL_PROCESS	5909072946664465	2.30854e+12
GO:1900126	negative regulation of hyaluronan biosynthetic process	BIOLOGICAL_PROCESS	5909072946664465	2.30854e+12
GO:0042594	response to starvation	BIOLOGICAL_PROCESS	5960208887183268	2.33606e+11
GO:0002165	instar larval or pupal development	BIOLOGICAL_PROCESS	5960208887183268	2.33509e+12
GO:0051090	regulation of DNA-binding transcription factor activity	BIOLOGICAL_PROCESS	5960208887183268	2.33392e+12
GO:2000146	negative regulation of cell motility	BIOLOGICAL_PROCESS	6316687923501912	2.4811e+12
GO:0014013	regulation of gliogenesis	BIOLOGICAL_PROCESS	6329049622757272	2.49129e+12
GO:2000846	regulation of corticosteroid hormone secretion	BIOLOGICAL_PROCESS	6329049622757272	2.48958e+11
GO:0071695	anatomical structure maturation	BIOLOGICAL_PROCESS	6350365766175601	2.50236e+11
GO:0002164	larval development	BIOLOGICAL_PROCESS	6366336810527622	2.51133e+12
GO:0008090	retrograde axonal transport	BIOLOGICAL_PROCESS	6375663452184244	2.51985e+12
GO:0031099	regeneration	BIOLOGICAL_PROCESS	6375663452184244	2.52039e+11
GO:0007254	JNK cascade	BIOLOGICAL_PROCESS	6609019475361418	2.62378e+10
GO:0051412	response to corticosterone	BIOLOGICAL_PROCESS	6660449283353042	2.64981e+11
GO:0007306	egg chorion assembly	BIOLOGICAL_PROCESS	6768451181293516	2.69563e+12
GO:0042445	hormone metabolic process	BIOLOGICAL_PROCESS	6813309784910305	2.71706e+12
GO:0009410	response to xenobiotic stimulus	BIOLOGICAL_PROCESS	6813309784910305	2.71924e+12
GO:0046883	regulation of hormone secretion	BIOLOGICAL_PROCESS	6826439490367242	2.72735e+12
GO:0007292	female gamete generation	BIOLOGICAL_PROCESS	687287478728297	2.7517e+11
GO:0051101	regulation of DNA binding	BIOLOGICAL_PROCESS	6963589237018038	2.79095e+12
GO:0010038	response to metal ion	BIOLOGICAL_PROCESS	7258421517234532	2.91218e+12
GO:0006241	CTP biosynthetic process	BIOLOGICAL_PROCESS	7712073005791957	3.10719e+12
GO:0002253	activation of immune response	BIOLOGICAL_PROCESS	7858677169756368	3.17951e+11
GO:0002831	regulation of response to biotic stimulus	BIOLOGICAL_PROCESS	787315718727477	3.18868e+11
GO:0032731	positive regulation of interleukin-1 beta production	BIOLOGICAL_PROCESS	791199420528222	3.21454e+11
GO:0023061	signal release	BIOLOGICAL_PROCESS	791199420528222	3.21305e+11
GO:0019319	hexose biosynthetic process	BIOLOGICAL_PROCESS	791199420528222	3.22108e+12
GO:0046843	dorsal appendage formation	BIOLOGICAL_PROCESS	791199420528222	3.21778e+11
GO:0032354	response to follicle-stimulating hormone	BIOLOGICAL_PROCESS	791199420528222	3.21778e+11
GO:0045912	negative regulation of carbohydrate metabolic process	BIOLOGICAL_PROCESS	7963395447617734	3.24958e+11
GO:0019216	regulation of lipid metabolic process	BIOLOGICAL_PROCESS	7963395447617734	3.25208e+12
GO:0032103	positive regulation of response to external stimulus	BIOLOGICAL_PROCESS	8039694215099471	3.28662e+12
GO:0065003	protein-containing complex assembly	BIOLOGICAL_PROCESS	8085117183834025	3.3086e+11
GO:0051301	cell division	BIOLOGICAL_PROCESS	8222740370733173	3.36838e+11
GO:0030706	germarium-derived oocyte differentiation	BIOLOGICAL_PROCESS	8239473403694481	3.38218e+11
GO:0051646	mitochondrion localization	BIOLOGICAL_PROCESS	867003679390398	3.56989e+12
GO:0030518	nuclear receptor-mediated steroid hormone signaling pathway	BIOLOGICAL_PROCESS	8712242305776033	3.59094e+11
GO:0033233	regulation of protein sumoylation	BIOLOGICAL_PROCESS	8729836077112604	3.60555e+12
GO:0010893	positive regulation of steroid biosynthetic process	BIOLOGICAL_PROCESS	8729836077112604	3.60555e+12
GO:0000165	MAPK cascade	BIOLOGICAL_PROCESS	8742662464532475	3.61453e+12
GO:0048709	oligodendrocyte differentiation	BIOLOGICAL_PROCESS	876135204597383	3.62595e+12
GO:2000106	regulation of leukocyte apoptotic process	BIOLOGICAL_PROCESS	8845695850345751	3.66458e+11
GO:0032355	response to estradiol	BIOLOGICAL_PROCESS	8909333076663981	3.6947e+11
GO:0030101	natural killer cell activation	BIOLOGICAL_PROCESS	8942656428982365	3.71229e+12
GO:0035850	epithelial cell differentiation involved in kidney development	BIOLOGICAL_PROCESS	9034685137016176	3.7543e+11
GO:0006779	porphyrin-containing compound biosynthetic process	BIOLOGICAL_PROCESS	9054442727344816	3.76632e+12
GO:0009617	response to bacterium	BIOLOGICAL_PROCESS	9074227431884498	3.77838e+11
GO:0098876	vesicle-mediated transport to the plasma membrane	BIOLOGICAL_PROCESS	9107190645337492	3.79594e+12
GO:0007444	imaginal disc development	BIOLOGICAL_PROCESS	938683051006306	3.92041e+12
GO:0044706	multi-multicellular organism process	BIOLOGICAL_PROCESS	940754172478052	3.94095e+12
GO:0120161	regulation of cold-induced thermogenesis	BIOLOGICAL_PROCESS	940754172478052	3.93914e+11
GO:0071900	regulation of protein serine/threonine kinase activity	BIOLOGICAL_PROCESS	940754172478052	3.93311e+11
GO:1905551	negative regulation of protein localization to endoplasmic reticulum	BIOLOGICAL_PROCESS	9421738120067916	3.97073e+11
GO:0051914	positive regulation of synaptic plasticity by chemical substance	BIOLOGICAL_PROCESS	9421738120067916	3.97073e+11
GO:0051915	induction of synaptic plasticity by chemical substance	BIOLOGICAL_PROCESS	9421738120067916	3.97073e+11
GO:0051913	regulation of synaptic plasticity by chemical substance	BIOLOGICAL_PROCESS	9421738120067916	3.97073e+11
GO:0072538	T-helper 17 type immune response	BIOLOGICAL_PROCESS	9624152139049134	4.0682e+12
GO:0033014	tetrapyrrole biosynthetic process	BIOLOGICAL_PROCESS	9624152139049134	4.0682e+12
GO:0046697	decidualization	BIOLOGICAL_PROCESS	9624152139049134	4.0682e+12
GO:0071320	cellular response to cAMP	BIOLOGICAL_PROCESS	9746936579230186	4.12421e+11
GO:0001819	positive regulation of cytokine production	BIOLOGICAL_PROCESS	9860110962666340	4.18041e+12
GO:0042255	ribosome assembly	BIOLOGICAL_PROCESS	1.01186e+16	4.30706e+10
GO:0006206	pyrimidine nucleobase metabolic process	BIOLOGICAL_PROCESS	1.01186e+16	4.3034e+11
GO:0106106	cold-induced thermogenesis	BIOLOGICAL_PROCESS	1.01551e+16	4.32687e+10
GO:0048477	oogenesis	BIOLOGICAL_PROCESS	1.03037e+16	4.39451e+11
GO:0048639	positive regulation of developmental growth	BIOLOGICAL_PROCESS	1.04061e+16	4.44259e+11
GO:0001667	ameboidal-type cell migration	BIOLOGICAL_PROCESS	1.07954e+16	4.61788e+12
GO:0045785	positive regulation of cell adhesion	BIOLOGICAL_PROCESS	1.08281e+16	4.63644e+10
GO:0071260	cellular response to mechanical stimulus	BIOLOGICAL_PROCESS	1.08409e+16	4.64665e+12
GO:0043124	negative regulation of canonical NF-kappaB signal transduction	BIOLOGICAL_PROCESS	1.08409e+16	4.65107e+11
GO:0072224	metanephric glomerulus development	BIOLOGICAL_PROCESS	1.09163e+16	4.6972e+12
GO:0009629	response to gravity	BIOLOGICAL_PROCESS	1.09163e+16	4.69421e+11
GO:0045940	positive regulation of steroid metabolic process	BIOLOGICAL_PROCESS	1.09163e+16	4.6972e+12
GO:0051384	response to glucocorticoid	BIOLOGICAL_PROCESS	1.0931e+16	4.70816e+12
GO:0007018	microtubule-based movement	BIOLOGICAL_PROCESS	1.09373e+16	4.71549e+12
GO:0047497	mitochondrion transport along microtubule	BIOLOGICAL_PROCESS	1.09432e+16	4.73183e+11
GO:0043401	steroid hormone receptor signaling pathway	BIOLOGICAL_PROCESS	1.10707e+16	4.7963e+11
GO:0008286	insulin receptor signaling pathway	BIOLOGICAL_PROCESS	1.10707e+16	4.7963e+11
GO:1901879	regulation of protein depolymerization	BIOLOGICAL_PROCESS	1.11052e+16	4.81594e+12
GO:0016049	cell growth	BIOLOGICAL_PROCESS	1119352533031762	4.85896e+11
GO:0045582	positive regulation of T cell differentiation	BIOLOGICAL_PROCESS	1129719512032346	4.90872e+11
GO:1990845	adaptive thermogenesis	BIOLOGICAL_PROCESS	1.16303e+16	5.05836e+11
GO:0006895	Golgi to endosome transport	BIOLOGICAL_PROCESS	1.17503e+16	5.11552e+11
GO:0030307	positive regulation of cell growth	BIOLOGICAL_PROCESS	1.17774e+16	5.13225e+11
GO:0072006	nephron development	BIOLOGICAL_PROCESS	1191895515950687	5.19897e+11
GO:2000118	regulation of sodium-dependent phosphate transport	BIOLOGICAL_PROCESS	1193603494068794	5.22278e+11
GO:0009209	pyrimidine ribonucleoside triphosphate biosynthetic process	BIOLOGICAL_PROCESS	1193603494068794	5.22278e+11
GO:0044341	sodium-dependent phosphate transport	BIOLOGICAL_PROCESS	1193603494068794	5.22278e+11
GO:0051261	protein depolymerization	BIOLOGICAL_PROCESS	1.2033e+16	5.27408e+11
GO:0001816	cytokine production	BIOLOGICAL_PROCESS	1.20472e+16	5.28664e+10
GO:0044210	'de novo' CTP biosynthetic process	BIOLOGICAL_PROCESS	1.20472e+16	5.29552e+11
GO:0060135	maternal process involved in female pregnancy	BIOLOGICAL_PROCESS	1.21347e+16	5.33909e+11
GO:0045786	negative regulation of cell cycle	BIOLOGICAL_PROCESS	1.21708e+16	5.36014e+11
GO:2000269	regulation of fibroblast apoptotic process	BIOLOGICAL_PROCESS	1.25289e+16	5.53019e+11
GO:0050658	RNA transport	BIOLOGICAL_PROCESS	1.25289e+16	5.54382e+11
GO:0050657	nucleic acid transport	BIOLOGICAL_PROCESS	1.25289e+16	5.54382e+11
GO:0048859	formation of anatomical boundary	BIOLOGICAL_PROCESS	1.25289e+16	5.55006e+11
GO:0009755	hormone-mediated signaling pathway	BIOLOGICAL_PROCESS	1.25289e+16	5.54821e+10
GO:0007178	cell surface receptor protein serine/threonine kinase signaling pathway	BIOLOGICAL_PROCESS	1.25289e+16	5.55479e+11
GO:0007281	germ cell development	BIOLOGICAL_PROCESS	1.25289e+16	5.52491e+11
GO:0010566	regulation of ketone biosynthetic process	BIOLOGICAL_PROCESS	1.25366e+16	5.56348e+10
GO:0048168	regulation of neuronal synaptic plasticity	BIOLOGICAL_PROCESS	1.25613e+16	5.57974e+11
GO:0045834	positive regulation of lipid metabolic process	BIOLOGICAL_PROCESS	1.26697e+16	5.63325e+11
GO:0009147	pyrimidine nucleoside triphosphate metabolic process	BIOLOGICAL_PROCESS	1.26724e+16	5.63976e+11
GO:0005996	monosaccharide metabolic process	BIOLOGICAL_PROCESS	127469415971989	5.68369e+11
GO:0051654	establishment of mitochondrion localization	BIOLOGICAL_PROCESS	1.27865e+16	5.70671e+11
GO:0050777	negative regulation of immune response	BIOLOGICAL_PROCESS	1293213183735805	5.78807e+11
GO:0007265	Ras protein signal transduction	BIOLOGICAL_PROCESS	1293213183735805	5.78458e+11
GO:0032446	protein modification by small protein conjugation	BIOLOGICAL_PROCESS	1305093058170842	5.85224e+11
GO:0042303	molting cycle	BIOLOGICAL_PROCESS	1.32315e+16	5.94435e+11
GO:0055092	sterol homeostasis	BIOLOGICAL_PROCESS	1.32847e+16	5.97384e+11
GO:0043435	response to corticotropin-releasing hormone	BIOLOGICAL_PROCESS	1.37021e+16	6.24443e+11
GO:0051168	nuclear export	BIOLOGICAL_PROCESS	1.37021e+16	6.21377e+11
GO:1903137	regulation of cell integrity MAPK cascade	BIOLOGICAL_PROCESS	1.37021e+16	6.24443e+11
GO:1903138	negative regulation of cell integrity MAPK cascade	BIOLOGICAL_PROCESS	1.37021e+16	6.24443e+11
GO:0051866	general adaptation syndrome	BIOLOGICAL_PROCESS	1.37021e+16	6.24443e+11
GO:0071376	cellular response to corticotropin-releasing hormone stimulus	BIOLOGICAL_PROCESS	1.37021e+16	6.24443e+11
GO:0034331	cell junction maintenance	BIOLOGICAL_PROCESS	1.37021e+16	6.21377e+11
GO:0098930	axonal transport	BIOLOGICAL_PROCESS	1.37021e+16	6.24817e+11
GO:1900623	regulation of monocyte aggregation	BIOLOGICAL_PROCESS	1.37021e+16	6.24443e+11
GO:1900625	positive regulation of monocyte aggregation	BIOLOGICAL_PROCESS	1.37021e+16	6.24443e+11
GO:0044342	type B pancreatic cell proliferation	BIOLOGICAL_PROCESS	1.37021e+16	6.23734e+11
GO:0006091	generation of precursor metabolites and energy	BIOLOGICAL_PROCESS	1.37037e+16	6.25467e+11
GO:0050996	positive regulation of lipid catabolic process	BIOLOGICAL_PROCESS	1.38357e+16	6.3266e+11
GO:0007346	regulation of mitotic cell cycle	BIOLOGICAL_PROCESS	1.39518e+16	6.38555e+11
GO:0010564	regulation of cell cycle process	BIOLOGICAL_PROCESS	1.39979e+16	6.41257e+11
GO:0070647	protein modification by small protein conjugation or removal	BIOLOGICAL_PROCESS	1430164641589486	6.55773e+11
GO:0014072	response to isoquinoline alkaloid	BIOLOGICAL_PROCESS	1432207770705162	6.57314e+11
GO:0051668	localization within membrane	BIOLOGICAL_PROCESS	1.44124e+16	6.62088e+11
GO:0061057	peptidoglycan recognition protein signaling pathway	BIOLOGICAL_PROCESS	1.44124e+16	6.62673e+11
GO:0040013	negative regulation of locomotion	BIOLOGICAL_PROCESS	1.45882e+16	6.71371e+11
GO:1903037	regulation of leukocyte cell-cell adhesion	BIOLOGICAL_PROCESS	1.46342e+16	6.74723e+11
GO:0050863	regulation of T cell activation	BIOLOGICAL_PROCESS	1.46342e+16	6.74723e+11
GO:0051236	establishment of RNA localization	BIOLOGICAL_PROCESS	1464607800784203	6.75887e+11
GO:0045621	positive regulation of lymphocyte differentiation	BIOLOGICAL_PROCESS	1.46504e+16	6.77322e+11
GO:0034643	establishment of mitochondrion localization, microtubule-mediated	BIOLOGICAL_PROCESS	1.46673e+16	6.78721e+11
GO:0051592	response to calcium ion	BIOLOGICAL_PROCESS	1.48277e+16	6.8677e+11
GO:0046677	response to antibiotic	BIOLOGICAL_PROCESS	1482843543319098	6.87427e+11
GO:0031116	positive regulation of microtubule polymerization	BIOLOGICAL_PROCESS	1.48563e+16	6.89347e+11
GO:0030316	osteoclast differentiation	BIOLOGICAL_PROCESS	1.4876e+16	6.90885e+11
GO:0045655	regulation of monocyte differentiation	BIOLOGICAL_PROCESS	1.50857e+16	7.01259e+11
GO:0000075	cell cycle checkpoint signaling	BIOLOGICAL_PROCESS	1.5415e+16	7.17218e+11
GO:0051651	maintenance of location in cell	BIOLOGICAL_PROCESS	1.5481e+16	7.2094e+11
GO:0072659	protein localization to plasma membrane	BIOLOGICAL_PROCESS	1.55459e+16	7.2462e+10
GO:0022409	positive regulation of cell-cell adhesion	BIOLOGICAL_PROCESS	1.55816e+16	7.28252e+10
GO:0051336	regulation of hydrolase activity	BIOLOGICAL_PROCESS	1612506202329561	7.54333e+10
GO:0071887	leukocyte apoptotic process	BIOLOGICAL_PROCESS	1.61495e+16	7.56157e+11
GO:0008306	associative learning	BIOLOGICAL_PROCESS	1618888008626032	7.58683e+11
GO:0006974	DNA damage response	BIOLOGICAL_PROCESS	1627835721001799	7.64249e+11
GO:0046890	regulation of lipid biosynthetic process	BIOLOGICAL_PROCESS	1.6283e+16	7.65151e+11
GO:0045162	clustering of voltage-gated sodium channels	BIOLOGICAL_PROCESS	1.62996e+16	7.67308e+11
GO:0010966	regulation of phosphate transport	BIOLOGICAL_PROCESS	1.62996e+16	7.67308e+11
GO:0007565	female pregnancy	BIOLOGICAL_PROCESS	1.6331e+16	7.69475e+11
GO:0016192	vesicle-mediated transport	BIOLOGICAL_PROCESS	1.65654e+16	7.81215e+11
GO:0007552	metamorphosis	BIOLOGICAL_PROCESS	1.65856e+16	7.82869e+11
GO:0009218	pyrimidine ribonucleotide metabolic process	BIOLOGICAL_PROCESS	1662294180924416	7.86031e+11
GO:0035930	corticosteroid hormone secretion	BIOLOGICAL_PROCESS	1662294180924416	7.86031e+11
GO:0010001	glial cell differentiation	BIOLOGICAL_PROCESS	1.67745e+16	7.93905e+11
GO:0006814	sodium ion transport	BIOLOGICAL_PROCESS	1.68085e+16	7.96222e+11
GO:0021545	cranial nerve development	BIOLOGICAL_PROCESS	1.69764e+16	8.04891e+11
GO:0019856	pyrimidine nucleobase biosynthetic process	BIOLOGICAL_PROCESS	1.72647e+16	8.20017e+11
GO:0006207	'de novo' pyrimidine nucleobase biosynthetic process	BIOLOGICAL_PROCESS	1.72647e+16	8.20017e+11
GO:0010828	positive regulation of D-glucose transmembrane transport	BIOLOGICAL_PROCESS	1.7473e+16	8.30644e+11
GO:0032535	regulation of cellular component size	BIOLOGICAL_PROCESS	1.75903e+16	8.36964e+11
GO:0014909	smooth muscle cell migration	BIOLOGICAL_PROCESS	1.77197e+16	8.44612e+11
GO:0008361	regulation of cell size	BIOLOGICAL_PROCESS	1.79787e+16	8.58473e+11
GO:0070972	protein localization to endoplasmic reticulum	BIOLOGICAL_PROCESS	1827802918589123	8.74307e+11
GO:0021538	epithalamus development	BIOLOGICAL_PROCESS	1827802918589123	8.74307e+11
GO:0044346	fibroblast apoptotic process	BIOLOGICAL_PROCESS	1.83495e+16	8.78497e+10
GO:0031960	response to corticosteroid	BIOLOGICAL_PROCESS	1.85163e+16	8.88825e+11
GO:0045444	fat cell differentiation	BIOLOGICAL_PROCESS	1.85163e+16	8.88338e+11
GO:0019318	hexose metabolic process	BIOLOGICAL_PROCESS	1.86968e+16	8.99065e+11
GO:0005976	polysaccharide metabolic process	BIOLOGICAL_PROCESS	1.88036e+16	9.04995e+11
GO:0043954	cellular component maintenance	BIOLOGICAL_PROCESS	1888046051965091	9.09489e+11
GO:0032885	regulation of polysaccharide biosynthetic process	BIOLOGICAL_PROCESS	1891360727655426	9.15807e+11
GO:0000196	cell integrity MAPK cascade	BIOLOGICAL_PROCESS	1891360727655426	9.20651e+11
GO:0097250	mitochondrial respirasome assembly	BIOLOGICAL_PROCESS	1891360727655426	9.20651e+11
GO:0014852	regulation of skeletal muscle contraction by neural stimulation via neuromuscular junction	BIOLOGICAL_PROCESS	1891360727655426	9.20651e+11
GO:0097292	XMP metabolic process	BIOLOGICAL_PROCESS	1891360727655426	9.20651e+11
GO:0097294	'de novo' XMP biosynthetic process	BIOLOGICAL_PROCESS	1891360727655426	9.20651e+11
GO:0097293	XMP biosynthetic process	BIOLOGICAL_PROCESS	1891360727655426	9.20651e+11
GO:0051946	regulation of glutamate uptake involved in transmission of nerve impulse	BIOLOGICAL_PROCESS	1891360727655426	9.20651e+11
GO:0051941	regulation of amino acid uptake involved in synaptic transmission	BIOLOGICAL_PROCESS	1891360727655426	9.20651e+11
GO:0070849	response to epidermal growth factor	BIOLOGICAL_PROCESS	1891360727655426	9.15807e+11
GO:0019249	lactate biosynthetic process	BIOLOGICAL_PROCESS	1891360727655426	9.20651e+11
GO:0044208	'de novo' AMP biosynthetic process	BIOLOGICAL_PROCESS	1891360727655426	9.20651e+11
GO:0050806	positive regulation of synaptic transmission	BIOLOGICAL_PROCESS	1.89514e+16	9.2329e+11
GO:0050795	regulation of behavior	BIOLOGICAL_PROCESS	1.90477e+16	9.32797e+11
GO:1902903	regulation of supramolecular fiber organization	BIOLOGICAL_PROCESS	1.90477e+16	9.3103e+11
GO:0022037	metencephalon development	BIOLOGICAL_PROCESS	1.90477e+16	9.32797e+11
GO:0007091	metaphase/anaphase transition of mitotic cell cycle	BIOLOGICAL_PROCESS	1.90477e+16	9.31962e+11
GO:0061515	myeloid cell development	BIOLOGICAL_PROCESS	1941123887610843	9.52237e+11
GO:0033108	mitochondrial respiratory chain complex assembly	BIOLOGICAL_PROCESS	1941123887610843	9.51937e+11
GO:0002076	osteoblast development	BIOLOGICAL_PROCESS	196667394987916	9.66429e+11
GO:0019730	antimicrobial humoral response	BIOLOGICAL_PROCESS	2003872103993239	9.87241e+11
GO:0021549	cerebellum development	BIOLOGICAL_PROCESS	2.0213e+16	9.96682e+11
GO:0009637	response to blue light	BIOLOGICAL_PROCESS	2.06502e+16	1.02085e+16
GO:0033687	osteoblast proliferation	BIOLOGICAL_PROCESS	2.11391e+16	1.0468e+16
GO:0051052	regulation of DNA metabolic process	BIOLOGICAL_PROCESS	2128116457158977	1.05473e+16
GO:0045618	positive regulation of keratinocyte differentiation	BIOLOGICAL_PROCESS	2.19411e+16	1088362138271278
GO:0051056	regulation of small GTPase mediated signal transduction	BIOLOGICAL_PROCESS	2215021610709038	1099669360003054
GO:0002252	immune effector process	BIOLOGICAL_PROCESS	2.22712e+16	1.10661e+16
GO:0032984	protein-containing complex disassembly	BIOLOGICAL_PROCESS	2.23816e+16	1.11304e+16
GO:0002761	regulation of myeloid leukocyte differentiation	BIOLOGICAL_PROCESS	2242576006766616	1116184366146061
GO:0120255	olefinic compound biosynthetic process	BIOLOGICAL_PROCESS	2246033997088207	1.1198e+16
GO:1905952	regulation of lipid localization	BIOLOGICAL_PROCESS	2.24762e+16	1.12154e+16
GO:0001817	regulation of cytokine production	BIOLOGICAL_PROCESS	2.3206e+16	1.15893e+16
GO:2000809	positive regulation of synaptic vesicle clustering	BIOLOGICAL_PROCESS	2.33419e+16	1168669890281124
GO:1902474	positive regulation of protein localization to synapse	BIOLOGICAL_PROCESS	2.33419e+16	1168669890281124
GO:0001558	regulation of cell growth	BIOLOGICAL_PROCESS	2.33419e+16	1.16843e+16
GO:0010970	transport along microtubule	BIOLOGICAL_PROCESS	2.36713e+16	1.18616e+16
GO:0070201	regulation of establishment of protein localization	BIOLOGICAL_PROCESS	2.38794e+16	1.19759e+16
GO:0032743	positive regulation of interleukin-2 production	BIOLOGICAL_PROCESS	2.44344e+16	1.22954e+16
GO:0072527	pyrimidine-containing compound metabolic process	BIOLOGICAL_PROCESS	2.44344e+16	1.22954e+16
GO:0046323	D-glucose import	BIOLOGICAL_PROCESS	2.44344e+16	1228665672264131
GO:0001893	maternal placenta development	BIOLOGICAL_PROCESS	2459099255117319	1.24054e+16
GO:0071364	cellular response to epidermal growth factor stimulus	BIOLOGICAL_PROCESS	2459099255117319	1.24054e+16
GO:0010883	regulation of lipid storage	BIOLOGICAL_PROCESS	2459099255117319	1.23941e+16
GO:0000302	response to reactive oxygen species	BIOLOGICAL_PROCESS	2467102166596599	1.24561e+16
GO:1903039	positive regulation of leukocyte cell-cell adhesion	BIOLOGICAL_PROCESS	2.46847e+16	1.24734e+16
GO:0099560	synaptic membrane adhesion	BIOLOGICAL_PROCESS	2.50464e+16	1.26668e+16
GO:0009914	hormone transport	BIOLOGICAL_PROCESS	2.50629e+16	1.26857e+16
GO:0030707	follicle cell of egg chamber development	BIOLOGICAL_PROCESS	2507097032404072	1.2732e+16
GO:0060271	cilium assembly	BIOLOGICAL_PROCESS	2507097032404072	1.27172e+16
GO:0031109	microtubule polymerization or depolymerization	BIOLOGICAL_PROCESS	2507097032404072	1.27285e+16
GO:0043255	regulation of carbohydrate biosynthetic process	BIOLOGICAL_PROCESS	2507097032404072	1.27285e+16
GO:0033005	positive regulation of mast cell activation	BIOLOGICAL_PROCESS	2539286090205942	1292758596160139
GO:0062012	regulation of small molecule metabolic process	BIOLOGICAL_PROCESS	2.5467e+16	1297608485650919
GO:0071496	cellular response to external stimulus	BIOLOGICAL_PROCESS	2.55343e+16	1.30319e+16
GO:0050678	regulation of epithelial cell proliferation	BIOLOGICAL_PROCESS	2.56024e+16	1.30774e+16
GO:0051304	chromosome separation	BIOLOGICAL_PROCESS	2569948671948443	1.31487e+16
GO:0007560	imaginal disc morphogenesis	BIOLOGICAL_PROCESS	2578624381297198	1.32039e+16
GO:0015980	energy derivation by oxidation of organic compounds	BIOLOGICAL_PROCESS	2594568988749523	1329650998954577
GO:0006851	mitochondrial calcium ion transmembrane transport	BIOLOGICAL_PROCESS	2.59581e+16	1.33466e+16
GO:0038095	Fc-epsilon receptor signaling pathway	BIOLOGICAL_PROCESS	2.59581e+16	1.33466e+16
GO:0021986	habenula development	BIOLOGICAL_PROCESS	2.59581e+16	1.33466e+16
GO:0008202	steroid metabolic process	BIOLOGICAL_PROCESS	2.61446e+16	1.34535e+16
GO:0042632	cholesterol homeostasis	BIOLOGICAL_PROCESS	2.62129e+16	1.34997e+16
GO:0051961	negative regulation of nervous system development	BIOLOGICAL_PROCESS	2.62389e+16	1.35242e+16
GO:2001233	regulation of apoptotic signaling pathway	BIOLOGICAL_PROCESS	2.62675e+16	1.355e+16
GO:0031396	regulation of protein ubiquitination	BIOLOGICAL_PROCESS	2630427952231654	136022214151561
GO:1904375	regulation of protein localization to cell periphery	BIOLOGICAL_PROCESS	2630427952231654	136022214151561
GO:0042552	myelination	BIOLOGICAL_PROCESS	2.6378e+16	1.36514e+16
GO:0046879	hormone secretion	BIOLOGICAL_PROCESS	2657086950240029	1.37625e+16
GO:0060059	embryonic retina morphogenesis in camera-type eye	BIOLOGICAL_PROCESS	2681188317219238	1390990736048922
GO:0050796	regulation of insulin secretion	BIOLOGICAL_PROCESS	2.72305e+16	1.41386e+16
GO:0099111	microtubule-based transport	BIOLOGICAL_PROCESS	2.75391e+16	1.43336e+16
GO:0006006	glucose metabolic process	BIOLOGICAL_PROCESS	2.76077e+16	1438093640920139
GO:0051100	negative regulation of binding	BIOLOGICAL_PROCESS	2777700072806499	1.44808e+16
GO:0032732	positive regulation of interleukin-1 production	BIOLOGICAL_PROCESS	2.78029e+16	1.45201e+16
GO:0017085	response to insecticide	BIOLOGICAL_PROCESS	2.78029e+16	1.45529e+16
GO:0016233	telomere capping	BIOLOGICAL_PROCESS	2.78029e+16	1.45529e+16
GO:0044321	response to leptin	BIOLOGICAL_PROCESS	2.78029e+16	1.45529e+16
GO:0008088	axo-dendritic transport	BIOLOGICAL_PROCESS	2.79026e+16	1.46522e+16
GO:0009148	pyrimidine nucleoside triphosphate biosynthetic process	BIOLOGICAL_PROCESS	2.79026e+16	1.46512e+16
GO:0032075	positive regulation of nuclease activity	BIOLOGICAL_PROCESS	2.79026e+16	1.46512e+16
GO:0071869	response to catecholamine	BIOLOGICAL_PROCESS	2.79026e+16	1.46522e+16
GO:0048469	cell maturation	BIOLOGICAL_PROCESS	2790893037693555	1.46672e+16
GO:0009156	ribonucleoside monophosphate biosynthetic process	BIOLOGICAL_PROCESS	2.80003e+16	1472707765536549
GO:0071371	cellular response to gonadotropin stimulus	BIOLOGICAL_PROCESS	2.80761e+16	1.47788e+16
GO:0050870	positive regulation of T cell activation	BIOLOGICAL_PROCESS	2850104280517153	1501445697339195
GO:0051249	regulation of lymphocyte activation	BIOLOGICAL_PROCESS	2856316362374489	1.50713e+16
GO:0051170	import into nucleus	BIOLOGICAL_PROCESS	2856316362374489	1.50685e+16
GO:0002281	macrophage activation involved in immune response	BIOLOGICAL_PROCESS	2.85684e+16	1.51101e+16
GO:0035332	positive regulation of hippo signaling	BIOLOGICAL_PROCESS	2.85684e+16	1.51101e+16
GO:0090150	establishment of protein localization to membrane	BIOLOGICAL_PROCESS	2.8745e+16	1.52157e+16
GO:0043687	post-translational protein modification	BIOLOGICAL_PROCESS	2.88846e+16	1.53139e+16
GO:0003226	right ventricular compact myocardium morphogenesis	BIOLOGICAL_PROCESS	2.92273e+16	1.56434e+16
GO:0015996	chlorophyll catabolic process	BIOLOGICAL_PROCESS	2.92273e+16	1.56434e+16
GO:2000853	negative regulation of corticosterone secretion	BIOLOGICAL_PROCESS	2.92273e+16	1.56434e+16
GO:2000415	positive regulation of fibronectin-dependent thymocyte migration	BIOLOGICAL_PROCESS	2.92273e+16	1.56434e+16
GO:2000413	regulation of fibronectin-dependent thymocyte migration	BIOLOGICAL_PROCESS	2.92273e+16	1.56434e+16
GO:2000278	regulation of DNA biosynthetic process	BIOLOGICAL_PROCESS	2.92273e+16	1.55279e+16
GO:0072681	fibronectin-dependent thymocyte migration	BIOLOGICAL_PROCESS	2.92273e+16	1.56434e+16
GO:0072680	extracellular matrix-dependent thymocyte migration	BIOLOGICAL_PROCESS	2.92273e+16	1.56434e+16
GO:0010133	L-proline catabolic process to L-glutamate	BIOLOGICAL_PROCESS	2.92273e+16	1.56434e+16
GO:0080119	ER body organization	BIOLOGICAL_PROCESS	2.92273e+16	1.56434e+16
GO:0019343	cysteine biosynthetic process via cystathionine	BIOLOGICAL_PROCESS	2.92273e+16	1.56434e+16
GO:0006511	ubiquitin-dependent protein catabolic process	BIOLOGICAL_PROCESS	2929568710579834	1.56924e+16
GO:0046631	alpha-beta T cell activation	BIOLOGICAL_PROCESS	2.94626e+16	1.57942e+16
GO:0071480	cellular response to gamma radiation	BIOLOGICAL_PROCESS	2957335115966269	1.58909e+16
GO:0021783	preganglionic parasympathetic fiber development	BIOLOGICAL_PROCESS	2957335115966269	1.58909e+16
GO:0044419	biological process involved in interspecies interaction between organisms	BIOLOGICAL_PROCESS	2957335115966269	1.58716e+16
GO:0042886	amide transport	BIOLOGICAL_PROCESS	2.97151e+16	1.59797e+16
GO:0019941	modification-dependent protein catabolic process	BIOLOGICAL_PROCESS	2.97484e+16	1.60101e+16
GO:0051247	positive regulation of protein metabolic process	BIOLOGICAL_PROCESS	3016749153961648	1.62611e+16
GO:0045667	regulation of osteoblast differentiation	BIOLOGICAL_PROCESS	3031820941314131	1.63551e+16
GO:0090276	regulation of peptide hormone secretion	BIOLOGICAL_PROCESS	3049910422912669	1647835958434778
GO:0071248	cellular response to metal ion	BIOLOGICAL_PROCESS	3049910422912669	1647835958434778
GO:0043632	modification-dependent macromolecule catabolic process	BIOLOGICAL_PROCESS	3.06968e+16	1.66091e+16
GO:0032881	regulation of polysaccharide metabolic process	BIOLOGICAL_PROCESS	3.06968e+16	1.66111e+16
GO:0031110	regulation of microtubule polymerization or depolymerization	BIOLOGICAL_PROCESS	3.07341e+16	1.66442e+16
GO:0030595	leukocyte chemotaxis	BIOLOGICAL_PROCESS	3.09556e+16	1677717643419887
GO:0048169	regulation of long-term neuronal synaptic plasticity	BIOLOGICAL_PROCESS	3.09647e+16	1.67952e+16
GO:0048483	autonomic nervous system development	BIOLOGICAL_PROCESS	3.10258e+16	1685444853759803
GO:0072384	organelle transport along microtubule	BIOLOGICAL_PROCESS	3.10258e+16	1685444853759803
GO:0061640	cytoskeleton-dependent cytokinesis	BIOLOGICAL_PROCESS	3.10959e+16	1.69151e+16
GO:0010948	negative regulation of cell cycle process	BIOLOGICAL_PROCESS	3.10959e+16	1.69187e+16
GO:0042634	regulation of hair cycle	BIOLOGICAL_PROCESS	3.11603e+16	1.69932e+16
GO:0048729	tissue morphogenesis	BIOLOGICAL_PROCESS	3.11603e+16	1698943190139087
GO:0048707	instar larval or pupal morphogenesis	BIOLOGICAL_PROCESS	3120117099320951	1.70418e+16
GO:0008366	axon ensheathment	BIOLOGICAL_PROCESS	3120117099320951	1.70418e+16
GO:0099558	maintenance of synapse structure	BIOLOGICAL_PROCESS	3131303433353027	1.7158e+16
GO:0018193	peptidyl-amino acid modification	BIOLOGICAL_PROCESS	3131303433353027	1.71688e+16
GO:0030705	cytoskeleton-dependent intracellular transport	BIOLOGICAL_PROCESS	3153770035616959	1.74315e+16
GO:1905475	regulation of protein localization to membrane	BIOLOGICAL_PROCESS	3153770035616959	1.73138e+16
GO:0048082	regulation of adult chitin-containing cuticle pigmentation	BIOLOGICAL_PROCESS	3153770035616959	1.74723e+16
GO:0048079	regulation of cuticle pigmentation	BIOLOGICAL_PROCESS	3153770035616959	1.74723e+16
GO:0072660	maintenance of protein location in plasma membrane	BIOLOGICAL_PROCESS	3153770035616959	1.74154e+16
GO:0072658	maintenance of protein location in membrane	BIOLOGICAL_PROCESS	3153770035616959	1.74154e+16
GO:0045089	positive regulation of innate immune response	BIOLOGICAL_PROCESS	3153770035616959	1.74781e+16
GO:1902817	negative regulation of protein localization to microtubule	BIOLOGICAL_PROCESS	3153770035616959	1.74723e+16
GO:1902816	regulation of protein localization to microtubule	BIOLOGICAL_PROCESS	3153770035616959	1.74723e+16
GO:0021814	cell motility involved in cerebral cortex radial glia guided migration	BIOLOGICAL_PROCESS	3153770035616959	1.74154e+16
GO:0007562	eclosion	BIOLOGICAL_PROCESS	3153770035616959	1.74154e+16
GO:0007294	germarium-derived oocyte fate determination	BIOLOGICAL_PROCESS	3153770035616959	1.74154e+16
GO:0007272	ensheathment of neurons	BIOLOGICAL_PROCESS	3.17217e+16	1.75935e+16
GO:0044784	metaphase/anaphase transition of cell cycle	BIOLOGICAL_PROCESS	3249460388558214	1.80769e+16
GO:0070228	regulation of lymphocyte apoptotic process	BIOLOGICAL_PROCESS	3249460388558214	1.80769e+16
GO:0031112	positive regulation of microtubule polymerization or depolymerization	BIOLOGICAL_PROCESS	3249460388558214	1.80769e+16
GO:0021602	cranial nerve morphogenesis	BIOLOGICAL_PROCESS	3256729976542113	1813107003966677
GO:0070232	regulation of T cell apoptotic process	BIOLOGICAL_PROCESS	3258556849495843	1.8155e+16
GO:0044782	cilium organization	BIOLOGICAL_PROCESS	3.26682e+16	1.82148e+16
GO:0042180	ketone metabolic process	BIOLOGICAL_PROCESS	327491983451725	18273743513574
GO:0110096	cellular response to aldehyde	BIOLOGICAL_PROCESS	3.29378e+16	1.84068e+16
GO:0031401	positive regulation of protein modification process	BIOLOGICAL_PROCESS	3310755990581781	1.85156e+16
GO:0045087	innate immune response	BIOLOGICAL_PROCESS	3.31105e+16	1.85312e+16
GO:0050770	regulation of axonogenesis	BIOLOGICAL_PROCESS	3318697626498132	1.8588e+16
GO:0014812	muscle cell migration	BIOLOGICAL_PROCESS	3364644515971	1.88595e+16
GO:0006094	gluconeogenesis	BIOLOGICAL_PROCESS	3365674629936742	1.88794e+16
GO:0034762	regulation of transmembrane transport	BIOLOGICAL_PROCESS	3372334600669152	1893100846296068
GO:0006954	inflammatory response	BIOLOGICAL_PROCESS	3.37435e+16	1.89708e+16
GO:0002791	regulation of peptide secretion	BIOLOGICAL_PROCESS	3.37435e+16	1.89653e+16
GO:2000369	regulation of clathrin-dependent endocytosis	BIOLOGICAL_PROCESS	3436579168124009	1.93786e+16
GO:0030516	regulation of axon extension	BIOLOGICAL_PROCESS	3447506257083014	1952725353858365
GO:1904353	regulation of telomere capping	BIOLOGICAL_PROCESS	3447506257083014	1.95258e+16
GO:0033003	regulation of mast cell activation	BIOLOGICAL_PROCESS	3447506257083014	1.95258e+16
GO:0010960	magnesium ion homeostasis	BIOLOGICAL_PROCESS	3447506257083014	1.95258e+16
GO:0120254	olefinic compound metabolic process	BIOLOGICAL_PROCESS	3487661202217866	1976948886118944
GO:0070231	T cell apoptotic process	BIOLOGICAL_PROCESS	3490496069172382	1.98003e+16
GO:0030029	actin filament-based process	BIOLOGICAL_PROCESS	3547004970454055	2.01358e+16
GO:0042332	gravitaxis	BIOLOGICAL_PROCESS	3.60424e+16	2.05215e+16
GO:2000551	regulation of T-helper 2 cell cytokine production	BIOLOGICAL_PROCESS	3.60424e+16	2.05215e+16
GO:0035745	T-helper 2 cell cytokine production	BIOLOGICAL_PROCESS	3.60424e+16	2.05215e+16
GO:0006082	organic acid metabolic process	BIOLOGICAL_PROCESS	3610694108592605	2.05734e+16
GO:0005977	glycogen metabolic process	BIOLOGICAL_PROCESS	3616844092815612	2.06237e+16
GO:0030224	monocyte differentiation	BIOLOGICAL_PROCESS	362161774479569	2.06662e+16
GO:0030325	adrenal gland development	BIOLOGICAL_PROCESS	3668839693995714	2.09511e+16
GO:0051251	positive regulation of lymphocyte activation	BIOLOGICAL_PROCESS	3.6753e+16	2.10035e+16
GO:0022604	regulation of cell morphogenesis	BIOLOGICAL_PROCESS	3688195253300968	2109272150509699
GO:0043383	negative T cell selection	BIOLOGICAL_PROCESS	3760554216514223	2.15541e+16
GO:0045060	negative thymic T cell selection	BIOLOGICAL_PROCESS	3760554216514223	2.15541e+16
GO:0046328	regulation of JNK cascade	BIOLOGICAL_PROCESS	3.83126e+16	2202392736385211
GO:1901976	regulation of cell cycle checkpoint	BIOLOGICAL_PROCESS	3.83126e+16	2202014580993787
GO:0071470	cellular response to osmotic stress	BIOLOGICAL_PROCESS	3.83126e+16	2199194868955387
GO:0006812	monoatomic cation transport	BIOLOGICAL_PROCESS	3836361293434923	2206942500648462
GO:0090596	sensory organ morphogenesis	BIOLOGICAL_PROCESS	3836991583631424	2.21054e+16
GO:0071392	cellular response to estradiol stimulus	BIOLOGICAL_PROCESS	3843426849897605	2.21587e+16
GO:0019752	carboxylic acid metabolic process	BIOLOGICAL_PROCESS	3.84995e+16	2.22125e+16
GO:0034504	protein localization to nucleus	BIOLOGICAL_PROCESS	3865496390409739	2233477558686679
GO:0044770	cell cycle phase transition	BIOLOGICAL_PROCESS	3899362750651635	2256332205261588
GO:0045900	negative regulation of translational elongation	BIOLOGICAL_PROCESS	395458024154602	2.28995e+16
GO:0048588	developmental cell growth	BIOLOGICAL_PROCESS	3962568700816765	229624577023898
GO:0006220	pyrimidine nucleotide metabolic process	BIOLOGICAL_PROCESS	3.96471e+16	230082669570442
GO:0006353	DNA-templated transcription termination	BIOLOGICAL_PROCESS	3.96471e+16	230082669570442
GO:0009266	response to temperature stimulus	BIOLOGICAL_PROCESS	3989659591439124	2316988754637185
GO:0070925	organelle assembly	BIOLOGICAL_PROCESS	3.98978e+16	2.31978e+16
GO:0002920	regulation of humoral immune response	BIOLOGICAL_PROCESS	3994497584076685	2324848770907747
GO:0030071	regulation of mitotic metaphase/anaphase transition	BIOLOGICAL_PROCESS	4.01686e+16	2.34125e+16
GO:0007293	germarium-derived egg chamber formation	BIOLOGICAL_PROCESS	4.01686e+16	2.34125e+16
GO:0048915	posterior lateral line system development	BIOLOGICAL_PROCESS	4.01915e+16	2.34428e+16
GO:0044042	glucan metabolic process	BIOLOGICAL_PROCESS	4.03245e+16	2.35373e+16
GO:0051048	negative regulation of secretion	BIOLOGICAL_PROCESS	4044660037275506	2362566930067368
GO:0034144	negative regulation of toll-like receptor 4 signaling pathway	BIOLOGICAL_PROCESS	4.10405e+16	2.39899e+16
GO:0046888	negative regulation of hormone secretion	BIOLOGICAL_PROCESS	4.14165e+16	2422713805256775
GO:0120162	positive regulation of cold-induced thermogenesis	BIOLOGICAL_PROCESS	4.21783e+16	2469049819348689
GO:0044794	host-mediated activation of viral process	BIOLOGICAL_PROCESS	4256784701069505	249364916321924
GO:0001701	in utero embryonic development	BIOLOGICAL_PROCESS	4332939637278658	2.54009e+16
GO:0046321	positive regulation of fatty acid oxidation	BIOLOGICAL_PROCESS	4333409540009257	2542189008636584
GO:0009886	post-embryonic animal morphogenesis	BIOLOGICAL_PROCESS	4334469831129362	2.54464e+16
GO:0061005	cell differentiation involved in kidney development	BIOLOGICAL_PROCESS	4.40751e+16	2589377665196294
GO:0043436	oxoacid metabolic process	BIOLOGICAL_PROCESS	4441843620374334	2611417671283798
GO:0048486	parasympathetic nervous system development	BIOLOGICAL_PROCESS	4504859480442551	2.65036e+16
GO:0099179	regulation of synaptic membrane adhesion	BIOLOGICAL_PROCESS	4.55131e+16	2.68345e+16
GO:0043173	nucleotide salvage	BIOLOGICAL_PROCESS	4.55131e+16	2.68345e+16
GO:0061162	establishment of monopolar cell polarity	BIOLOGICAL_PROCESS	4.5645e+16	2695071711880394
GO:0051898	negative regulation of phosphatidylinositol 3-kinase/protein kinase B signal transduction	BIOLOGICAL_PROCESS	4.5645e+16	2695071711880394
GO:0071867	response to monoamine	BIOLOGICAL_PROCESS	4.58017e+16	2.70625e+16
GO:0044089	positive regulation of cellular component biogenesis	BIOLOGICAL_PROCESS	4618727775293193	2.73293e+16
GO:0010827	regulation of D-glucose transmembrane transport	BIOLOGICAL_PROCESS	4640281233812393	2.74959e+16
GO:0031643	positive regulation of myelination	BIOLOGICAL_PROCESS	4.65743e+16	2.76565e+16
GO:2000678	negative regulation of transcription regulatory region DNA binding	BIOLOGICAL_PROCESS	4.65743e+16	2.76565e+16
GO:0048703	embryonic viscerocranium morphogenesis	BIOLOGICAL_PROCESS	4670850454701235	2775581229403549
GO:0031554	regulation of termination of DNA-templated transcription	BIOLOGICAL_PROCESS	4675242252662455	2.7841e+16
GO:0001649	osteoblast differentiation	BIOLOGICAL_PROCESS	4691346998464426	2.79567e+16
GO:0051235	maintenance of location	BIOLOGICAL_PROCESS	4714211849935215	2.81526e+16
GO:0048881	mechanosensory lateral line system development	BIOLOGICAL_PROCESS	4714211849935215	2.81467e+16
GO:0060872	semicircular canal development	BIOLOGICAL_PROCESS	4714211849935215	2.81467e+16
GO:0060236	regulation of mitotic spindle organization	BIOLOGICAL_PROCESS	4.75718e+16	2.84493e+16
GO:0048568	embryonic organ development	BIOLOGICAL_PROCESS	4.75718e+16	2844787887416021
GO:0043161	proteasome-mediated ubiquitin-dependent protein catabolic process	BIOLOGICAL_PROCESS	4789784073708059	2.86644e+16
GO:0071479	cellular response to ionizing radiation	BIOLOGICAL_PROCESS	4793193649449235	2.8705e+16
GO:0050821	protein stabilization	BIOLOGICAL_PROCESS	4800756713616313	2.87705e+16
GO:0042062	long-term strengthening of neuromuscular junction	BIOLOGICAL_PROCESS	4852189786521407	2926282697451169
GO:0048085	adult chitin-containing cuticle pigmentation	BIOLOGICAL_PROCESS	4852189786521407	2926282697451169
GO:0050787	detoxification of mercury ion	BIOLOGICAL_PROCESS	4852189786521407	2926282697451169
GO:0032077	positive regulation of deoxyribonuclease activity	BIOLOGICAL_PROCESS	4852189786521407	2926282697451169
GO:0007593	chitin-based cuticle sclerotization	BIOLOGICAL_PROCESS	4852189786521407	2926282697451169
GO:0090087	regulation of peptide transport	BIOLOGICAL_PROCESS	4870459033277708	2.93935e+16
GO:2001251	negative regulation of chromosome organization	BIOLOGICAL_PROCESS	4.90778e+16	2.96394e+16
GO:0032102	negative regulation of response to external stimulus	BIOLOGICAL_PROCESS	4910861475810943	2967875655897207
GO:0043506	regulation of JUN kinase activity	BIOLOGICAL_PROCESS	4923906839704531	2978772079137754
GO:2000807	regulation of synaptic vesicle clustering	BIOLOGICAL_PROCESS	4923906839704531	2.97991e+16
GO:0010565	regulation of ketone metabolic process	BIOLOGICAL_PROCESS	4.94361e+16	2.996e+16
GO:0031349	positive regulation of defense response	BIOLOGICAL_PROCESS	4948440486589793	3.01094e+16
GO:0032651	regulation of interleukin-1 beta production	BIOLOGICAL_PROCESS	4948440486589793	3.01303e+16
GO:0051640	organelle localization	BIOLOGICAL_PROCESS	4948440486589793	3.01353e+16
GO:0061136	regulation of proteasomal protein catabolic process	BIOLOGICAL_PROCESS	4948440486589793	3013127068380238
GO:0010562	positive regulation of phosphorus metabolic process	BIOLOGICAL_PROCESS	4948440486589793	3.00936e+16
GO:0045937	positive regulation of phosphate metabolic process	BIOLOGICAL_PROCESS	4948440486589793	3.00936e+16
GO:0032611	interleukin-1 beta production	BIOLOGICAL_PROCESS	4948440486589793	3.01303e+16
GO:1904659	D-glucose transmembrane transport	BIOLOGICAL_PROCESS	4967760903611883	3.02739e+16

## Sheet: Supp. Table 7
Supplementary Table S7: H3K27ac peak counts per sample. Number of called H3K27ac peaks (“Accessible Peaks”) for each CUT&RUN library, grouped by condition (Control/Familiar) and time point (30 or 120 min). Peaks were called with MACS2 against matched input. One Familiar-30 sample yielded only 7,077 peaks (≫4 SD below group mean) and was treated as an outlier; it was excluded from summary statisti…
Condition	TimePoint	Accessible Peaks
Control	30	43433
Control	30	43435
Control	30	42550
Control	30	46441
Control	30	43486
Control	30	46361
Control	120	42228
Control	120	46971
Control	120	43281
Control	120	48264
Control	120	46408
Control	120	48125
Familiar	30	42704
Familiar	30	7077
Familiar	30	46565
Familiar	30	46913
Familiar	30	46144
Familiar	30	44737
Familiar	120	45859
Familiar	120	43829
Familiar	120	34714
Familiar	120	46162
Familiar	120	45952
Familiar	120	39584

## Sheet: Supp. Table 8
Supplementary Table 8. Differentially accessible peaks (DAPs; n = 11) identified 30 min after the assay. Each row is one peak from the consensus set. Columns report genomic position (chromosome, start, end), effect size (Fold, log₂ accessibility difference; sign indicates direction Familiar minus Control), uncertainty and significance (p.value, FDR), and accessibility levels (Conc overall and gro…
PeakID (cmd=annotatePeaks.pl /home/fishlab4/Desktop/software/Output/DiffBind/RisultatiPerHomer/diffpeaks_30MinNarrowNoOut2_fixed.homerPeaks /home/fishlab4/Desktop/CleanerGenome/Cleaner_wrasse_softmasked_ChaHeader_final.fasta -gtf /home/fishlab4/Desktop/CleanerGenome/Ldim_RNANew.gtf -annStats annStats.txt)	Chr	Start	End	Conc	Conc_Familiar	Conc_Control	Fold	p.value	FDR	Nearest PromoterID	Gene	Symbol
peak_1	chr12	22580123	22581027	5.75892	6.46064	4.33834	0.532305	2.06956e-07	0.00509888	g4227.t1	Ldim_g4227	fuz
peak_2	chr22	6677220	6678465	4.73997	5.73997	0	11.7996	2.1873e-13	1.07779e-08	g13751.t1	Ldim_g13751	Ppp1r8
peak_3	chr20	14048716	14051556	g12092.t1	4.60645	5.60645	-3.41562	7.42662	3.20262e-07	0.00248843	Ldim_g12092	misp3
peak_4	chr8	21650973	21653412	g21692.t1	5.90334	3.90268	6.71079	-0.604319	8.87682e-06	0.0459819	Ldim_g21692	MXRA7
peak_5	chr2	18925514	18927748	g11203.t1	5.60671	6.57634	1.0218	5.41959	6.52437e-08	0.000760415	Ldim_g11203	Gmeb1
peak_6	chr22	6677199	6678478	g13751.t1	4.73997	5.73997	-0.421513	21.2251	2.1873e-13	1.01972e-08	Ldim_g13751	Ppp1r8
peak_7	chr22	18433891	18435487	g14268.t1	4.41576	5.40201	-3.75932	5.16193	1.2564e-06	0.00732166	Ldim_g14268	Tstd3
peak_8	chr12	2898951	2911370	g3620.t1	10.1585	10.4213	9.83686	0.534667	3.91067e-08	0.000607718	Ldim_g3620	LOC114462299
peak_9	chr2	7324608	7325729	g10857.t1	4.1851	5.17104	5.98462	4.98399	1.22701e-06	0.00732166	Ldim_g10857	ZNF226
peak_10	chr8	17848606	17849849	g21548.t1	4.74265	5.74265	4.35982	7.8246	1.47815e-07	0.00137822	Ldim_g21548	DKK3
peak_11	chr12	10782237	10783342	g3827.t2	4.46719	5.46719	-3.54426	7.85576	5.43299e-10	1.26643e-05	Ldim_g3827	GFI1

## Sheet: Supp. Table 9
Supplementary Table 9. Differentially accessible peaks at 120 min (n = 9). Columns mirror Table 7: chromosome, start, end, Fold (log₂ difference; direction as above), p.value, FDR, overall and group-wise accessibility summaries (Conc), and—where available—nearest gene, distance to TSS, and feature class. Entries highlight signals consistent with consolidation and support processes, including peak…
PeakID (cmd=annotatePeaks.pl /home/fishlab4/Desktop/software/Output/DiffBind/RisultatiPerHomer/diffpeaks_120MinNarrowNoOut_fixed.homerPeaks /home/fishlab4/Desktop/CleanerGenome/Cleaner_wrasse_softmasked_ChaHeader_final.fasta -gtf /home/fishlab4/Desktop/CleanerGenome/Ldim_RNANew.gtf -annStats annStats.txt)	Chr	Start	End	Conc	Conc_Familiar	Conc_Control	Fold	p.value	FDR	Nearest PromoterID	Gene	Symbol
peak_1	chr11	14922038	14922695	4.95127	1.59163	5.76039	-0.00279198	3.33519e-06	0.0425812	g2805.t1	Ldim_g2805	DOCK2
peak_2	chr16	2094894	2096562	7.19172	6.22477	7.68436	-0.0109526	4.15907e-08	0.002124	g7396.t1	Ldim_g7396	Lrrc15
peak_3	chr16	18421283	18421814	4.50503	5.56964	1.03652	0.00267955	1.99593e-06	0.0401688	g7975.t4	Ldim_g7975	SLC5A3
peak_4	chr1	20440882	20441164	4.04451	0	4.90359	-0.00193271	2.35968e-06	0.0401688	g599.t1	Ldim_g599	NLE1
peak_5	chr15	17974150	17977229	7.36929	6.25084	7.90486	-1.49913	5.61868e-08	0.000679565	g6901.t2	Ldim_g6901	Znf513
peak_6	chr3	16779104	16779915	4.06956	0	4.94403	-7.03861	4.5936e-08	0.000679565	g16037.t1	Ldim_g16037	THAP9
peak_7	chr18	21086727	21092058	5.14313	6.28064	2.53164	21.9499	2.57022e-14	1.24345e-09	g9806.t1	Ldim_g9806	RDH8
peak_8	chr7	33812645	33817828	8.51656	8.05945	8.81087	-0.274095	6.0811e-06	0.0420282	g21048.t2	Ldim_g21048	STBD1
peak_9	chr15	14034506	14035453	4.13264	0	5.00711	-19.2712	2.89419e-11	7.00091e-07	g6764.t1	Ldim_g6764	-

## Sheet: Supp. Table 10
Supplementary Table 10. Differential accessibility across time within the Control condition (n = 54). Each row is a consensus peak with columns for chromosome, start, end, Fold (log₂ change 120 vs 30 min within Control; sign indicates direction), p.value, FDR, Conc (overall and per-time summaries where present), and annotation fields (nearest gene, distance to TSS, feature class) when available. …
PeakID (cmd=annotatePeaks.pl /home/fishlab4/Desktop/software/Output/DiffBind/RisultatiPerHomer/diffpeaks_Control30vs120NarrowNoOut_fixed.homerPeaks /home/fishlab4/Desktop/CleanerGenome/Cleaner_wrasse_softmasked_ChaHeader_final.fasta -gtf /home/fishlab4/Desktop/CleanerGenome/Ldim_RNANew.gtf -annStats annStats.txt)	Chr	Start	End	Conc	Conc_120	Conc_30	Fold	p.value	FDR	Nearest PromoterID	Gene	Symbol
peak_1	chr3	24138173	24141110	8.91739	9.17104	8.60944	0.24761	2.07249e-05	0.0272336	g16256.t1	Ldim_g16256	KCNH5
peak_2	chr1	2210480	2212329	9.69221	9.89849	9.45143	0.264138	3.60863e-06	0.0142258	g77.t1	Ldim_g77	INTS2
peak_3	chr1	4861257	4865144	10.2344	10.4101	10.0344	0.223476	4.58919e-05	0.0385943	g162.t1	Ldim_g162	ska2
peak_4	chr10	14670101	14675274	10.4585	10.672	10.2079	0.237923	2.97496e-05	0.0314838	g1655.t1	Ldim_g1655	ARID5B
peak_5	chr11	18378542	18383060	9.65257	9.93116	9.307	0.417848	7.4565e-09	0.000176369	g2973.t1	Ldim_g2973	-
peak_6	chr11	31861974	31864290	9.29907	9.53587	9.01562	0.251911	1.48775e-05	0.0263754	g3447.t1	Ldim_g3447	LOC111607966
peak_7	chr11	25497359	25499368	8.59692	8.88765	8.23241	0.231576	4.54306e-05	0.0385943	g3230.t9	Ldim_g3230	-
peak_8	chr11	10948689	10953025	9.54755	9.23165	9.80654	-0.244661	2.44915e-05	0.0293705	g2631.t1	Ldim_g2631	Dlg3
peak_9	chr12	1950013	1953357	10.8368	11.0028	10.6493	0.243323	3.46742e-06	0.0142258	g3601.t3	Ldim_g3601	-
peak_10	chr13	5155018	5157561	9.72288	9.93737	9.47084	0.245614	1.79419e-05	0.0263754	g4640.t2	Ldim_g4640	-
peak_11	chr15	20803516	20806838	10.921	11.1105	10.7028	0.22667	4.89506e-05	0.0385943	g6968.t1	Ldim_g6968	ARMC2
peak_12	chr15	24675767	24679651	11.3149	11.4916	11.1136	0.242543	8.02618e-06	0.0189843	g7123.t1	Ldim_g7123	Prep
peak_13	chr15	1146889	1150710	10.9354	11.0956	10.7552	0.233972	6.98549e-06	0.0183586	g6431.t1	Ldim_g6431	-
peak_14	chr16	2094894	2096600	7.39053	7.83944	6.73535	0.511054	4.47202e-06	0.015111	g7396.t1	Ldim_g7396	Lrrc15
peak_15	chr17	9015765	9019985	8.78902	9.18692	8.23774	0.475915	2.54814e-06	0.0142258	g8383.t3	Ldim_g8383	-
peak_16	chr17	15401240	15407854	10.8149	11.0277	10.5652	0.240553	2.48345e-05	0.0293705	g8600.t1	Ldim_g8600	PDIA5
peak_17	chr17	29678606	29680358	8.20105	8.61925	7.60974	0.34975	1.32075e-05	0.0263754	g9138.t2	Ldim_g9138	-
peak_18	chr21	8559333	8560923	8.91059	9.15782	8.61206	0.239777	3.06146e-05	0.0314838	g12613.t1	Ldim_g12613	AKT1S1
peak_19	chr23	15194077	15197247	8.33616	8.70842	7.83314	0.288065	1.89567e-05	0.0263754	g14771.t1	Ldim_g14771	-
peak_20	chr4	33523588	33525604	8.45365	8.78058	8.03024	0.270244	1.62799e-05	0.0263754	g17814.t3	Ldim_g17814	Errfi1
peak_21	chr5	12470843	12474246	10.1881	10.3863	9.95811	0.228565	4.83693e-05	0.0385943	g18152.t2	Ldim_g18152	Rnf186
peak_22	chr5	11537205	11539850	10.8981	11.0477	10.7312	0.215059	3.03894e-05	0.0314838	g18118.t1	Ldim_g18118	EVC2
peak_23	chr5	17008655	17010546	7.2086	7.65776	6.55287	0.663112	1.40206e-06	0.0110543	g18290.t1	Ldim_g18290	ARHGEF25
peak_24	chr5	11757516	11760703	9.07682	9.31329	8.79384	0.235281	3.84291e-05	0.0363586	g18128.t1	Ldim_g18128	tpra1
peak_25	chr5	15775913	15779882	9.90347	10.1611	9.58957	0.232226	4.47908e-05	0.0385943	g18235.t1	Ldim_g18235	Gdf11
peak_26	chr7	33770091	33771898	8.57613	8.87445	8.1996	0.257371	1.79432e-05	0.0263754	g21048.t2	Ldim_g21048	STBD1
peak_27	chr7	24269202	24271077	7.79594	7.1749	8.22868	-0.462812	5.29643e-06	0.0156595	g20814.t1	Ldim_g20814	slc25a46
peak_28	chr7	25441150	25446021	11.6832	11.8252	11.5257	0.209244	3.256e-05	0.0320892	g20826.t1	Ldim_g20826	-
peak_29	chr7	34156888	34158432	8.13167	8.56921	7.50061	0.878208	9.24634e-08	0.00109352	g21055.t1	Ldim_g21055	Tcf7l1
peak_30	chr8	26656623	26658128	7.65606	8.01569	7.17593	0.288786	1.62642e-05	0.0263754	g21821.t1	Ldim_g21821	Apcs
peak_31	chr9	31867008	31870215	9.03868	9.33215	8.66987	0.222163	6.52293e-05	0.04977	g23057.t1	Ldim_g23057	Got2
peak_32	chr12	1949412	1955603	11.0019	11.1676	10.8147	0.224527	4.56962e-07	0.00215846	g3601.t4	Ldim_g3601	-
peak_33	chr9	7293537	7298184	7.99449	7.37552	8.42623	-0.277944	5.06671e-05	0.0416219	g22203.t1	Ldim_g22203	Dhx32
peak_34	chr3	7380779	7395305	9.69376	9.18837	10.0673	-0.782979	3.06255e-08	0.000359806	g15748.t1	Ldim_g15748	TRIM25
peak_35	chr15	8089538	8110084	11.2313	11.5225	10.8661	0.233624	3.21905e-05	0.0325848	g6607.t12	Ldim_g6607	SIPA1L1
peak_36	chr4	8513885	8534130	10.562	10.8436	10.2117	0.226664	3.27676e-05	0.0325848	g17018.t1	Ldim_g17018	GABRA2
peak_37	chr21	8556521	8561772	9.29381	9.528	9.0141	0.195797	4.70055e-05	0.0409236	g12613.t1	Ldim_g12613	AKT1S1
peak_38	chr14	8917882	8923341	8.10289	7.18505	8.65939	-0.579213	8.51586e-06	0.0268164	g5770.t4	Ldim_g5770	KCNAB1
peak_39	chr17	9026457	9029281	7.51958	7.9847	6.82893	0.366158	2.58238e-05	0.0325848	g8384.t1	Ldim_g8384	-
peak_40	chr11	10947907	10953387	9.59326	9.27156	9.85615	-0.220886	2.71988e-05	0.0325848	g2631.t1	Ldim_g2631	Dlg3
peak_41	chr5	11757227	11762923	11.0876	11.2222	10.9391	0.180772	3.27217e-05	0.0325848	g18128.t1	Ldim_g18128	tpra1
peak_42	chr3	12360167	12372322	11.1494	11.3006	10.9806	0.188074	2.67345e-05	0.0325848	g15876.t3	Ldim_g15876	Amt
peak_43	chr6	14553782	14557626	7.38625	6.60178	7.89157	-1.04342	1.89455e-07	0.00119319	g19579.t1	Ldim_g19579	POL
peak_44	chr23	15193406	15197365	8.38846	8.75757	7.89117	0.298482	3.00178e-05	0.0325848	g14771.t1	Ldim_g14771	-
peak_45	chr4	15228203	15233701	8.28031	8.60219	7.86535	0.267039	2.70048e-05	0.0325848	g17215.t1	Ldim_g17215	Syt14
peak_46	chr5	18297094	18301168	8.41615	7.93372	8.77705	-0.257814	4.67461e-05	0.0409236	g18350.t2	Ldim_g18350	CAV3
peak_47	chr11	18378392	18383503	9.67794	9.95858	9.32919	0.505425	3.80868e-08	0.000359806	g2973.t1	Ldim_g2973	-
peak_48	chr14	22524427	22530109	8.8704	9.18784	8.46282	0.23169	4.7651e-05	0.0409236	g6265.t1	Ldim_g6265	POU2AF1
peak_49	chr1	23817734	23819720	8.94488	9.16186	8.68938	0.18577	6.88365e-05	0.0484987	g716.t1	Ldim_g716	CLDN4
peak_50	chr3	24137710	24141699	8.94266	9.19116	8.64227	0.228983	1.45983e-05	0.0318825	g16256.t1	Ldim_g16256	KCNH5
peak_51	chr5	24898322	24906386	8.37586	7.69122	8.83827	-0.246045	7.17338e-05	0.0484987	g18611.t1	Ldim_g18611	H2BC17
peak_52	chr7	25440963	25447978	11.7178	11.8607	11.5592	0.185998	2.49248e-05	0.0325848	g20826.t1	Ldim_g20826	-
peak_53	chr17	29677842	29681140	8.36469	8.80606	7.72557	0.425137	1.5607e-05	0.0318825	g9138.t2	Ldim_g9138	-
peak_54	chr7	31446839	31453006	7.21602	6.25449	7.78793	-0.241838	6.17023e-05	0.0469912	g20999.t1	Ldim_g20999	svop

[truncated: 1 more sheets: Supp. Table 11]
